# Supplementary material for: The impact of large language models on higher education: exploring the connection between AI and Education 4.0
Source: Frontiers journal article supplement (doi:10.3389/feduc.2024.1392091), 2024-06-14
Supplement: Table_1.XLSX [file Table_1.XLSX]

## Sheet: Searchstrings
Search strings	SCOPUS	WOS
Search strings1	(TITLE-ABS-KEY("large language model*" OR "LLM") AND TITLE-ABS-KEY("higher education" OR "university" OR "college"))	ALL=("large language model*" OR "LLM") AND ALL=("higher education" OR "university" OR "college")
(“large language model*” OR "LLM") AND ("higher education" OR "university" OR "college")	175	631
Search strings2	(TITLE-ABS-KEY("large language model*" OR "LLM") AND TITLE-ABS-KEY("higher education" OR "university" OR "college") AND TITLE-ABS-KEY ("artificial intelligence" OR "AI"))	ALL=("large language model*" OR "LLM") AND ALL=("higher education" OR "university" OR "college") AND ALL=("artificial intelligence" OR "AI")
(“large language model*” OR "LLM") AND ("higher education" OR "university" OR "college") AND ("artificial intelligence" OR "AI")	113	203
total	288	834
Final (Duplicated documents were removed through list selection on the platforms)	177	631

## Sheet: ScopusInitial
Number	Authors	Author(s) ID	Title	Year	Source title	Volume	Issue	Art. No.	Page start	Page end	Page count	Cited by	DOI	Link	Affiliations	Authors with affiliations	Abstract	Author Keywords	Index Keywords	Molecular Sequence Numbers	Chemicals/CAS	Tradenames	Manufacturers	Funding Details	Funding Text 1	Funding Text 2	Funding Text 3	Funding Text 4	Funding Text 5	Funding Text 6	Funding Text 7	Funding Text 8	Funding Text 9	Funding Text 10	References	Correspondence Address	Editors	Sponsors	Publisher	Conference name	Conference date	Conference location	Conference code	ISSN	ISBN	CODEN	PubMed ID	Language of Original Document	Abbreviated Source Title
1	(2023) Inews		https://inews.co.uk/news/oxford-cambridge-ban-chatgpt-plagiarism-universities-2178391?ITO=newsnow	(March 2); Wu	D.	Li	H.	Chen	X.	Analysis on the influence of artificial intelligence generic large model on education application (2023) Open Education Research	29 (2)	pp. 19-25; Xames	M. D.	Shefa	J.	ChatGPT for research and publication: Opportunities and challenges (2023) Journal of Applied Learning and Teaching	6 (1).	https://doi.org/10.37074/jalt.2023.6.1.20	Advance online publication; Xu	Y.	Programmatic dreams: Technographic inquiry into censorship of Chinese chatbots (2018) Social Media+ Society	4 (4).	2056305118808780; Yalalov	D.	ChatGPT was taught by the world’s poorest people (2023) Metaverse Post		https://mpost.io/chatgpt-was-taught-by-the-worlds-poorest-people/	(January 18); Yang	Z.	There’s no Tiananmen Square in the new Chinese image-making AI (2022) MIT Technology Review		https://www.technologyreview.com/2022/09/14/1059481/baidu-chinese-image-ai-tiananme	(September 14); Yang	Z.	The bearable mediocrity of Baidu’s ChatGPT competitor (2023) MIT Technology Review		https://www.technologyreview.com/2023/03/22/1070154/baidu-ernie-bot-chatgpt-reputation/	March 22); Yang	Z.	Chinese tech giant Baidu just released its answer to ChatGPT (2023) MIT Technology Review		https://www.technologyreview.com/2023/03/16/1069919/baidu-ernie-bot-chatgpt-launch/	March 16); Yau	C.	Chan	K.	University of Hong Kong temporarily bans students from using ChatGPT	other AI-based tools for coursework (2023) South China Morning Post
2	[No author name available]	[No author id available]	AI will transform science — now researchers must tame it	2023	Nature	621	7980		658			1	10.1038/d41586-023-02988-6	https://www.scopus.com/inward/record.uri?eid=2-s2.0-85172226273&doi=10.1038%2fd41586-023-02988-6&partnerID=40&md5=20b5c1f030d29a40be4e08907b26c80d			[No abstract available]	Authorship; Computer science; Education; Machine learning	access to information; artificial intelligence; diagnostic procedure; Editorial; English (language); human; large language model; machine learning; peer review; protein folding; publication; scientist; student; university; tosylarginine methyl ester; Tosylarginine Methyl Ester		tosylarginine methyl ester, 901-47-3; Tosylarginine Methyl Ester																		Nature Research					280836		NATUA	37758895	English	Nature
3	[No author name available]	[No author id available]	DeSE 2023 - Proceedings: 16th International Conference on Developments in eSystems Engineering	2023	Proceedings - International Conference on Developments in eSystems Engineering, DeSE						900			https://www.scopus.com/inward/record.uri?eid=2-s2.0-85189305658&partnerID=40&md5=23c1d88c700d9133dead7df84a2c09af			The proceedings contain 152 papers. The topics discussed include: single and multilevel offshore wind speed prediction - a comparison of LSTM, GRU and bidirectional; violent activity detection on public transportation using surveillance footage; perspectives on industry 4.0 awareness among undergraduate IT students in Iraq: University of Anbar as a case study; task scheduling in IoT cloud-fog env…																				Obe D.A.-J.Assi S.Jayabalan M.Hind J.Hussain A.Tawfik H.Rowe N.Mustafina J.	Alnoor University College;University of Anbar;University Technology of Iraq;Wasit University	Institute of Electrical and Electronics Engineers Inc.	16th International Conference on Developments in eSystems Engineering, DeSE 2023	18 December 2023 through 20 December 2023		198346	21611343	9798350381344			English	Proc. - Int. Conf. Dev. eSystems Eng., DeSE
4	[No author name available]	[No author id available]	25th International Symposium on Computers in Education, SIIE 2023	2023	25th International Symposium on Computers in Education, SIIE 2023						281			https://www.scopus.com/inward/record.uri?eid=2-s2.0-85188219136&partnerID=40&md5=de5621da1d036052d4a152f7a883f208			The proceedings contain 44 papers. The topics discussed include: a tracer for teacher development in the programming language ScratchJr; promoting global awareness of the SDGs in the classroom through the SDGCalendar platform; the emergence of algorithmics in grade 1: a study within the mathematical curriculum; e-assessment systems: an evaluation framework from the perspective of higher education…																				do Rosario Rodrigues M.Figueiredo M.Torres J.		Institute of Electrical and Electronics Engineers Inc.	25th International Symposium on Computers in Education, SIIE 2023	16 November 2023 through 18 November 2023		197174		9798350329315			English	Int. Symp. Comput. Educ., SIIE
5	[No author name available]	[No author id available]	AIxEDU 2023 - Proceedings of the 1st International Workshop on High-Performance Artificial Intelligence Systems in Education, co-located with 22nd International Conference of the Italian Association for Artificial Intelligence, AIxIA 2023	2023	CEUR Workshop Proceedings	3605					110			https://www.scopus.com/inward/record.uri?eid=2-s2.0-85183305391&partnerID=40&md5=d3f84d2571ca7545ef5c236ac4a0328e			The proceedings contain 10 papers. The topics discussed include: do not ask what instruction-following large language models can do for teaching; large language models for sustainable assessment and feedback in higher education: towards a pedagogical and technological framework; using ChatGPT to enhance students’ behavior in social media via the moral foundation theory; ai in board game-based lea…																				Schicchi D.Taibi D.Temperini M.		CEUR-WS	1st International Workshop on High-Performance Artificial Intelligence Systems in Education, AIxEDU 2023	6 November 2023		196077	16130073				English	CEUR Workshop Proc.
6	[No author name available]	[No author id available]	22nd International Conference on Web-based Learning, ICWL 2023	2023	Lecture Notes in Computer Science (including subseries Lecture Notes in Artificial Intelligence and Lecture Notes in Bioinformatics)	14409 LNCS					219			https://www.scopus.com/inward/record.uri?eid=2-s2.0-85178572378&partnerID=40&md5=ea68bd763d1123339ecfb53fa9001bf9			The proceedings contain 16 papers. The special focus in this conference is on Web-based Learning. The topics include: Intended Learning Outcomes and Taxonomy Mapping at University Level; mixed Reality Learning Visualizations Using Knowledge Graphs; tracking the Adaptive Learning Process with Topics Ontology; prompting Large Language Models to Power Educational Chatbots; motivating Learners with G…																										Xie H.Lai C.-L.Chen W.Xu G.Popescu E.		Springer Science and Business Media Deutschland GmbH	22nd International Conference on Web-based Learning, ICWL 2023	26 November 2023 through 28 November 2023		304739
7	[No author name available]	[No author id available]	24th International Conference on Artificial Intelligence in Education, AIED 2023	2023	Lecture Notes in Computer Science (including subseries Lecture Notes in Artificial Intelligence and Lecture Notes in Bioinformatics)	13916 LNAI					835			https://www.scopus.com/inward/record.uri?eid=2-s2.0-85164911495&partnerID=40&md5=a466d41843d6bfdb421d1aca1edec0ed			The proceedings contain 79 papers. The special focus in this conference is on Artificial Intelligence in Education. The topics include: The Road Not Taken: Preempting Dropout in MOOCs; does Informativeness Matter? Active Learning for Educational Dialogue Act Classification; can Virtual Agents Scale Up Mentoring?: Insights from College Students’ Experiences Using the CareerFair.ai Platform at an A…																										Wang N.Rebolledo-Mendez G.Matsuda N.Santos O.C.Dimitrova V.		Springer Science and Business Media Deutschland GmbH	24th International Conference on Artificial Intelligence in Education, AIED 2023	3 July 2023 through 7 July 2023		297049
8	[No author name available]	[No author id available]	23rd International Conference on Artificial Intelligence in Education, AIED 2022	2022	Lecture Notes in Computer Science (including subseries Lecture Notes in Artificial Intelligence and Lecture Notes in Bioinformatics)	13356 LNCS					1386			https://www.scopus.com/inward/record.uri?eid=2-s2.0-85135936977&partnerID=40&md5=ffaff23598f69dfaf04ca45972810a11			The proceedings contain 208 papers. The special focus in this conference is on Artificial Intelligence in Education. The topics include: Investigating the Effectiveness of Visual Learning Analytics in Active Video Watching; debiasing Politically Motivated Reasoning with Value-Adaptive Instruction; towards Human-Like Educational Question Generation with Large Language Models; towards the Automated…																										Rodrigo M.M.Matsuda N.Cristea A.I.Dimitrova V.		Springer Science and Business Media Deutschland GmbH	23rd International Conference on Artificial Intelligence in Education, AIED 2022	27 July 2022 through 31 July 2022		281319
9	[No author name available]	[No author id available]	23rd International Conference on Artificial Intelligence in Education, AIED 2022	2022	Lecture Notes in Computer Science (including subseries Lecture Notes in Artificial Intelligence and Lecture Notes in Bioinformatics)	13355 LNCS					1386			https://www.scopus.com/inward/record.uri?eid=2-s2.0-85135878417&partnerID=40&md5=8ce5ec3396d4f228e30743edfbb8699c			The proceedings contain 208 papers. The special focus in this conference is on Artificial Intelligence in Education. The topics include: Investigating the Effectiveness of Visual Learning Analytics in Active Video Watching; debiasing Politically Motivated Reasoning with Value-Adaptive Instruction; towards Human-Like Educational Question Generation with Large Language Models; towards the Automated…																				Rodrigo M.M.Matsuda N.Cristea A.I.Dimitrova V.		Springer Science and Business Media Deutschland GmbH	23rd International Conference on Artificial Intelligence in Education, AIED 2022	27 July 2022 through 31 July 2022		281319	3029743	9783031116438			English	Lect. Notes Comput. Sci.
10	Agostini D., Picasso F.	57190582936;58308904900;	Large Language Models for Sustainable Assessment and Feedback in Higher Education: Towards a Pedagogical and Technological Framework	2023	CEUR Workshop Proceedings	3605								https://www.scopus.com/inward/record.uri?eid=2-s2.0-85183207058&partnerID=40&md5=980513e31ae1f48174bfa2bce2a65e80	University of Trento, Palazzo Fedrigotti, corso Bettini 31, Rovereto, 38068, Italy	Agostini, D., University of Trento, Palazzo Fedrigotti, corso Bettini 31, Rovereto, 38068, Italy; Picasso, F., University of Trento, Palazzo Fedrigotti, corso Bettini 31, Rovereto, 38068, Italy	Nowadays, there is growing attention on enhancing the quality of teaching, learning and assessment processes. As a recent EU Report underlines, the assessment and feedback area remains a problematic issue regarding educational professionals’ training and adopting new practices. In fact, traditional summative assessment practices are predominantly used in European countries, against the recommenda…	Artificial Intelligence; Assessment; Educational Technology; Evaluation; Higher Education; Large Language Models; Technology-Enhanced Assessment	Computational linguistics; Education computing; Engineering education; Sustainable development; Assessment; Assessment practices; Evaluation; High educations; Language model; Large language model; Quality of teaching; Sustainable assessment; Technological framework; Technology-enhanced assessment; Students																(2015) Yerevan Communiqué, , https://www.ehea.info/page-ministerial-conferenceyerevan-2015; (2018), https://eurydice.eacea.ec.europa.eu/publications/2018-eurydice-publications; Punie, Y., Redecker, C., (2017) European Framework for the Digital Competence of Educators, , editor(s) DigCompEdu, EUR 28775 EN, Publications Office of the European Union, Luxembourg, (online), JRC107466; Tamkin, A., Brun…	Agostini, D.; University of Trento, corso Bettini 31, Italy; email: daniele.agostini@unitn.it	Schicchi D.Taibi D.Temperini M.		CEUR-WS	1st International Workshop on High-Performance Artificial Intelligence Systems in Education, AIxEDU 2023	6 November 2023		196077	16130073				English	CEUR Workshop Proc.
11	Akiba D., Fraboni M.C.	57028183300;55646497800;	AI-Supported Academic Advising: Exploring ChatGPT’s Current State and Future Potential toward Student Empowerment	2023	Education Sciences	13	9	885				5	10.3390/educsci13090885	https://www.scopus.com/inward/record.uri?eid=2-s2.0-85172154840&doi=10.3390%2feducsci13090885&partnerID=40&md5=c80ee3f321e45545c03df031e7aa0be0	School of Education, Queens College, Graduate Center of the City University of New York, New York, NY 10016, United States	Akiba, D., School of Education, Queens College, Graduate Center of the City University of New York, New York, NY 10016, United States; Fraboni, M.C., School of Education, Queens College, Graduate Center of the City University of New York, New York, NY 10016, United States	Artificial intelligence (AI), once a phenomenon primarily in the world of science fiction, has evolved rapidly in recent years, steadily infiltrating into our daily lives. ChatGPT, a freely accessible AI-powered large language model designed to generate human-like text responses to users, has been utilized in several areas, such as the healthcare industry, to facilitate interactive dissemination …	academic advising; AI; artificial intelligence; ChatGPT; educational equity; higher education; large language model; student empowerment; student success						City University of New York, CUNY; Robin Hood Foundation: A1N-5A000000IYl2QAA	This research was funded by the Robin Hood Foundation (Grant Number A1N-5A000000IYl2QAA) and additional funding from the City University of New York’s Computing Integrated Teacher Education (CITE) Initiative.										https://chat.openai.com, Available online; Stojanov, A., Learning with ChatGPT 3.5 as a More Knowledgeable Other: An Autoethnographic Study (2023) Int. J. Educ. Technol. High. Educ, 20, p. 35; Anders, B.A., Is Using ChatGPT Cheating, Plagiarism, Both, Neither, or Forward Thinking? (2023) Patterns, 4, p. 100694. , 36960444; Chan, Z.C.Y., Chan, H.Y., Chow, H.C.J., Choy, S.N., Ng, K.Y., Wong, K.Y., …	Akiba, D.; School of Education, United States; email: dakiba@qc.cuny.edu			Multidisciplinary Digital Publishing Institute (MDPI)					22277102				English	Educ. Sci.
12	Almeida T., Jonker R.A.A., Poudel R., Silva J.M., Matos S.	57196719694;57386941900;57387315500;57194129937;26031510200;	BIT.UA at BioASQ 11B: Two-Stage IR with Synthetic Training and Zero-Shot Answer Generation	2023	CEUR Workshop Proceedings	3497			37	59				https://www.scopus.com/inward/record.uri?eid=2-s2.0-85175640751&partnerID=40&md5=fa33d83b1fac566ffbd3785123af4055	IEETA/DETI, LASI, University of Aveiro, Portugal	Almeida, T., IEETA/DETI, LASI, University of Aveiro, Portugal; Jonker, R.A.A., IEETA/DETI, LASI, University of Aveiro, Portugal; Poudel, R., IEETA/DETI, LASI, University of Aveiro, Portugal; Silva, J.M., IEETA/DETI, LASI, University of Aveiro, Portugal; Matos, S., IEETA/DETI, LASI, University of Aveiro, Portugal	This paper presents the efforts of the Biomedical Informatics and Technologies (BIT) group at the University of Aveiro in the eleventh edition of the BioASQ challenge. This paper presents our efforts in the eleventh edition of the BioASQ challenge. We addressed Task B in its two phases: document retrieval (phase A) and question answering (phase B). In phase A, we utilized a sparse retrieval metho…	Answer Generation; Dense Retrieval; Information Retrieval; Language model	Bioinformatics; Computational linguistics; Natural language processing systems; Zero-shot learning; Answer generation; Biomedical informatics; Biomedical technologies; Dense retrieval; Document Retrieval; In-phase; Language model; Phase A; Question Answering; Two phase; Information retrieval					European Commission, EC: 101081813; Fundação para a Ciência e a Tecnologia, FCT: 2020.05784, UIDB/00127/2020	This work was partially supported by national funds through the Foundation for Science and Technology (FCT) in the context of the project UIDB/00127/2020. Tiago Almeida is funded by FCT under the grant 2020.05784.BD. Jorge Miguel Silva has received funding from the EC under grant agreement 101081813, Genomic Data Infrastructure.																Klerings, I., Weinhandl, A. S., Thaler, K. J., Information overload in healthcare: too much of a good thing? (2015) Zeitschrift für Evidenz, Fortbildung und Qualität im Gesundheitswesen, 109, pp. 285-290; Tsatsaronis, G., Schroeder, M., Paliouras, G., Almirantis, Y., Androutsopoulos, I., Gaussier, E., Gallinari, P., Zschunke, M., BioASQ: A challenge on large-scale biomedical semantic indexing and…	Matos, S.; IEETA/DETI, Portugal; email: aleixomatos@ua.pt	Aliannejadi M.Faggioli G.Ferro N.Vlachos M.		CEUR-WS	24th Working Notes of the Conference and Labs of the Evaluation Forum, CLEF-WN 2023	18 September 2023 through 21 September 2023		193170
13	Alqahtani T., Badreldin H.A., Alrashed M., Alshaya A.I., Alghamdi S.S., bin Saleh K., Alowais S.A., Alshaya O.A., Rahman I., Al Yami M.S., Albekairy A.M.	56014236500;57190973148;57458054100;56916024300;57224012693;57190609432;57216868796;57218346061;57206898909;57193308791;55645843000;	The emergent role of artificial intelligence, natural learning processing, and large language models in higher education and research	2023	Research in Social and Administrative Pharmacy	19	8		1236	1242		29	10.1016/j.sapharm.2023.05.016	https://www.scopus.com/inward/record.uri?eid=2-s2.0-85162096958&doi=10.1016%2fj.sapharm.2023.05.016&partnerID=40&md5=0f64e9ed4681b4b86e8e6fd8c80ef00c	Department of Pharmaceutical Sciences, College of Pharmacy, King Saud bin Abdulaziz University for Health Sciences, Saudi Arabia; King Abdullah International Medical Research Center, Riyadh, Saudi Arabia; Department of Pharmacy Practice, College of Pharmacy, King Saud bin Abdulaziz University for Health Sciences, King Abdullah International Medical Research Center, Riyadh, Saudi Arabia; Pharmaceu…	Alqahtani, T., Department of Pharmaceutical Sciences, College of Pharmacy, King Saud bin Abdulaziz University for Health Sciences, Saudi Arabia, King Abdullah International Medical Research Center, Riyadh, Saudi Arabia; Badreldin, H.A., King Abdullah International Medical Research Center, Riyadh, Saudi Arabia, Department of Pharmacy Practice, College of Pharmacy, King Saud bin Abdulaziz Universit…	Artificial Intelligence (AI) has revolutionized various domains, including education and research. Natural language processing (NLP) techniques and large language models (LLMs) such as GPT-4 and BARD have significantly advanced our comprehension and application of AI in these fields. This paper provides an in-depth introduction to AI, NLP, and LLMs, discussing their potential impact on education …	Artificial intelligence; Education; Large language models; Natural language processing; Pharmacy; Research	algorithm bias; artificial intelligence; career; constructive feedback; data analysis; education; field study; human; human experiment; learning; mental health; natural language processing; outcome assessment; peer review; review; tertiary education; curriculum; educational status; student; Artificial Intelligence; Curriculum; Educational Status; Humans; Learning; Students						N/A.										Zawacki-Richter, O., Marín, V.I., Bond, M., Gouverneur, F., Systematic review of research on artificial intelligence applications in higher education – where are the educators? (2019) Int J Educ Technol High Educ, 16 (1), pp. 1-27; Sarker, I.H., AI-based modeling: techniques, applications and research issues towards automation, intelligent and smart systems (2022) SN Comput Sci, 3 (2); Tai, M.C.T…	Alqahtani, T.; College of Pharmacy at KSAU-HS, 2915 Al Haras Al Watani St, Ar Rimayah, Saudi Arabia; email: Qahtanita@ksau-hs.edu.sa			Elsevier Inc.					15517411			37321925	English	Res. Soc. Adm. Pharm.
14	Amaya E.J.C., Restrepo-Calle F., Ramírez-Echeverry J.J.	58643273100;36195972000;56237308500;	DISCOVERING INSIGHTS IN LEARNING ANALYTICS THROUGH A MIXED-METHODS FRAMEWORK: APPLICATION TO COMPUTER PROGRAMMING EDUCATION	2023	Journal of Information Technology Education: Research	22			339	372			10.28945/5182	https://www.scopus.com/inward/record.uri?eid=2-s2.0-85173949352&doi=10.28945%2f5182&partnerID=40&md5=fd57ee1d41b4ae4276e98e6a5b656178	Universidad Nacional de Colombia, Bogotá, Colombia	Amaya, E.J.C., Universidad Nacional de Colombia, Bogotá, Colombia; Restrepo-Calle, F., Universidad Nacional de Colombia, Bogotá, Colombia; Ramírez-Echeverry, J.J., Universidad Nacional de Colombia, Bogotá, Colombia	Aim/Purpose This article proposes a framework based on a sequential explanatory mixed-methods design in the learning analytics domain to enhance the models used to support the success of the learning process and the learner. The framework consists of three main phases: (1) quantitative data analysis; (2) qualitative data analysis; and (3) integration and discussion of results. Furthermore, we ill…	computer programming; content analysis; correlation analysis; learning analytics; mixed methods																							Aissa, M., Al-Kalbani, M., Al-Hatali, S., BinTouq, A., Novice learning programming languages in Omani higher education institution (Nizwa University) issues, challenges and solutions (2020) Sustainable development and social responsibility, 2, pp. 143-148. , https://doi.org/10.1007/978-3-030-32902-0_18, A. Al-Masri, & Y. Al-Assaf (Eds), –). Springer; Aljohani, N. R., Daud, A., Abbasi, R. A., Alow…	Restrepo-Calle, F.; Universidad Nacional de ColombiaColombia; email: ferestrepoca@unal.edu.co			Informing Science Institute
15	Ayre D., Dougherty C., Zhao Y.	58894457000;58894332800;57195962236;	IMPLEMENTATION OF AN ARTIFICIAL INTELLIGENCE (AI) INSTRUCTIONAL SUPPORT SYSTEM IN A VIRTUAL REALITY (VR) THERMAL-FLUIDS LABORATORY	2023	ASME International Mechanical Engineering Congress and Exposition, Proceedings (IMECE)	8		IMECE2023-112683					10.1115/IMECE2023-112683	https://www.scopus.com/inward/record.uri?eid=2-s2.0-85185393784&doi=10.1115%2fIMECE2023-112683&partnerID=40&md5=c2492592a016478a4b3591ff82a93be5	California State Polytechnic University Pomona, Pomona, CA, United States	Ayre, D., California State Polytechnic University Pomona, Pomona, CA, United States; Dougherty, C., California State Polytechnic University Pomona, Pomona, CA, United States; Zhao, Y., California State Polytechnic University Pomona, Pomona, CA, United States	Physical laboratory experiments have long been the cornerstone of higher education, providing future engineers practical real-life experience invaluable to their careers. However, demand for laboratory time has exceeded physical capabilities. Virtual reality (VR) labs have proven to retain many benefits of attending physical labs while also providing significant advantages only available in a VR …	Artificial Intelligence; Engineering Education; Generative AI; GPT; Virtual Reality	Artificial intelligence; E-learning; Education computing; Engineering education; Fluid mechanics; Laboratories; Professional aspects; Students; Generative ARTIFICIAL INTELLIGENCE; GPT; High educations; Instructional support; Laboratory class; Laboratory experiments; Physical laboratory; Support systems; Thermal fluids; Virtual-reality environment; Virtual reality																Ayre, D., Dougherty, C., Held, S., Zhao, Y., Development of a Virtual Reality (VR) Thermal-Fluids Lab Experience (2023) ASEE-PSW Conference, , Apr; Paszkiewicz, Salach, M., Strzalka, D., Budzik, G., Nikodem, A., Wójcik, H., Witek, M., VR Education Support System-A Case Study of Digital Circuits Design (2021) Energies (Basel), 15 (1), p. 277. , https://doi.org/10.3390/en15010277; Peixoto, B., Pint…			American Society of Mechanical Engineers (ASME)	American Society of Mechanical Engineers (ASME)	ASME 2023 International Mechanical Engineering Congress and Exposition, IMECE 2023	29 October 2023 through 2 November 2023		197186		9780791887653			English	ASME Int Mech Eng Congress Expos Proc
16	Azaiz I., Deckarm O., Strickroth S.	57214246872;58754058900;55336504600;	AI-Enhanced Auto-Correction of Programming Exercises: How Effective is GPT-3.5?	2023	International Journal of Engineering Pedagogy	13	8		67	83			10.3991/ijep.v13i8.45621	https://www.scopus.com/inward/record.uri?eid=2-s2.0-85183535998&doi=10.3991%2fijep.v13i8.45621&partnerID=40&md5=b833b66880e8dba052d79be65cec37a4	LMU Munich, Munich, Germany	Azaiz, I., LMU Munich, Munich, Germany; Deckarm, O., LMU Munich, Munich, Germany; Strickroth, S., LMU Munich, Munich, Germany	Timely formative feedback is considered as one of the most important drivers for effective learning. Delivering timely and individualized feedback is particularly challenging in large classes in higher education. Recently Large Language Models such as GPT-3 became available to the public that showed promising results on various tasks such as code generation and code explanation. This paper invest…	e-assessment; formative assessment; GPT-3.5; large language model; personalized feedback; programming education						Bundesministerium für Bildung und Forschung, BMBF: 16DHBKI013	This research is part of the project AIM@LMU funded by the German Federal Ministry of Education and Research (BMBF? under the grant number 16DHBKI013. The responsibility for the content of this publication lies with the authors.										Luxton-Reilly, A., Simon, I. Albluwi, Becker, B. A., Giannakos, M., Kumar, A. N., L., L., Paterson, J., Szabo, C., Introductory programming: A systematic literature review (2018) Proc. ITiCSE, pp. 55-106. , https://doi.org/10.1145/3293881.3295779; Hattie, J., Timperley, H., The power of feedback (2007) Review of Educational Research, 77 (1), pp. 81-112. , https://doi.org/10.3102/003465430298487; …	Azaiz, I.; LMU MunichGermany; email: imen.azaiz@ifi.lmu.de			International Association of Online Engineering					21924880				English	Int. J. Engi. Pedagogy
17	Back S., Aspuru-Guzik A., Ceriotti M., Gryn'ova G., Grzybowski B., Gu G.H., Hein J., Hippalgaonkar K., Hormázabal R., Jung Y., Kim S., Kim W.Y., Moosavi S.M., Noh J., Park C., Schrier J., Schwaller P., Tsuda K., Vegge T., von Lilienfeld O.A., Walsh A.	57200678669;6507007526;23088470100;36625137300;7004632584;57226152916;7103275287;21742730500;57960037900;7402506401;55995754200;8669281200;57193955748;57190981658;58836825000;6602824045;57200552603;7202766502;7003740838;8685459200;35315151400;	Accelerated chemical science with AI	2023	Digital Discovery	3	1		23	33			10.1039/d3dd00213f	https://www.scopus.com/inward/record.uri?eid=2-s2.0-85180310133&doi=10.1039%2fd3dd00213f&partnerID=40&md5=734d26d55c175b684936583cc7ab773a	Department of Chemical and Biomolecular Engineering, Institute of Emergent Materials, Sogang University, Seoul, South Korea; Departments of Chemistry, Computer Science, University of Toronto, St. George Campus, Toronto, ON, Canada; Acceleration Consortium and Vector Institute for Artificial Intelligence, Toronto, ON M5S 1M1, Canada; Laboratory of Computational Science and Modeling (COSMO), École …	Back, S., Department of Chemical and Biomolecular Engineering, Institute of Emergent Materials, Sogang University, Seoul, South Korea; Aspuru-Guzik, A., Departments of Chemistry, Computer Science, University of Toronto, St. George Campus, Toronto, ON, Canada, Acceleration Consortium and Vector Institute for Artificial Intelligence, Toronto, ON M5S 1M1, Canada; Ceriotti, M., Laboratory of Computat…	In light of the pressing need for practical materials and molecular solutions to renewable energy and health problems, to name just two examples, one wonders how to accelerate research and development in the chemical sciences, so as to address the time it takes to bring materials from initial discovery to commercialization. Artificial intelligence (AI)-based techniques, in particular, are having …							2021-0-02068; Schweizerischer Nationalfonds zur Förderung der Wissenschaftlichen Forschung, SNF; University of Toronto, U of T; Ministry of Science, ICT and Future Planning, MSIP: RS-2023-00283902; Korea Institute of Science and Technology, KIST; National Research Foundation of Korea, NRF; Institute for Information and Communications Technology Promotion, IITP: 2021-0-01343; NCCR Catalysis, NCCR:…	The symposium organizers (YJ, AAG, and AVL) are grateful to KIST for generous financial support to organize the symposium. YJ acknowledges support from IITP Korea (No. 2021-0-01343, Artificial Intelligence Graduate School Program for Seoul National University & No. 2021-0-02068, Artificial Intelligence Innovation Hub) and NRF of Korea funded by Ministry of Science and ICT (RS-2023-00283902). PS a…										Yano, J., Gaffney, K.J., Gregoire, J., Hung, L., Ourmazd, A., Schrier, J., Sethian, J.A., Toma, F.M., (2022) Nat. Rev. Chem., 6, pp. 357-370. , 37117931; Jorner, K., Tomberg, A., Bauer, C., Sköld, C., Norrby, P.-O., (2021) Nat. Rev. Chem., 5, pp. 240-255. , 37117288; Meuwly, M., (2021) Chem. Rev., 121, pp. 10218-10239. , 34097378; Schwaller, P., Vaucher, A.C., Laplaza, R., Bunne, C., Krause, A., …	Back, S.; Department of Chemical and Biomolecular Engineering, South Korea; email: sback@sogang.ac.kr			Royal Society of Chemistry					2635098X				English	Digit. Discov.
18	Balogun S., Aitken D., Winzenberg T., Wills K., Scott D., Callisaya M., Jones G.	57188978583;55769769100;6506860016;7006917345;55340635200;24075168600;34769726500;	Longitudinal Associations of Serum 25-hydroxyvitamin D, Physical Activity, and Knee Pain and Dysfunction with Muscle Loss in Community-dwelling Older Adults	2018	Journals of Gerontology - Series A Biological Sciences and Medical Sciences	73	4		526	531		12	10.1093/gerona/glx157	https://www.scopus.com/inward/record.uri?eid=2-s2.0-85044245189&doi=10.1093%2fgerona%2fglx157&partnerID=40&md5=1f1d42f26da0cba69d92b7944b470b95	Menzies Institute for Medical Research, University of Tasmania, Hobart, Australia; Department of Medicine, School of Clinical Sciences at Monash Health, Faculty of Medicine, Nursing and Health Sciences, Monash University, Clayton, VIC, Australia; Melbourne Medical School, Australian Institute for Musculoskeletal Science, University of Melbourne and Western Health, St Albans, VIC, Australia; Menzi…	Balogun, S., Menzies Institute for Medical Research, University of Tasmania, Hobart, Australia; Aitken, D., Menzies Institute for Medical Research, University of Tasmania, Hobart, Australia; Winzenberg, T., Menzies Institute for Medical Research, University of Tasmania, Hobart, Australia; Wills, K., Menzies Institute for Medical Research, University of Tasmania, Hobart, Australia; Scott, D., Depa…	Aim To describe the associations of between-person and within-person variability in serum 25-hydroxyvitamin D (25(OH)D), physical activity (PA), and knee pain and dysfunction with muscle mass, strength, and muscle quality over 10 years in community-dwelling older adults. Method Participants (N = 1033; 51% women; mean age 63 ± 7.4 years) were measured at baseline, 2.5, 5, and 10 years. Lower limb …	Body composition; Pain; Physical activity; Vitamin D	25-hydroxyvitamin D; vitamin D; analogs and derivatives; anatomy and histology; blood; body composition; exercise; female; human; independent living; knee; longitudinal study; male; middle aged; muscle strength; pain measurement; pathophysiology; photon absorptiometry; physiology; skeletal muscle; Absorptiometry, Photon; Body Composition; Exercise; Female; Humans; Independent Living; Knee Joint; …		25-hydroxyvitamin D; Vitamin D														Murphy, R.A., Ip, E.H., Zhang, Q., Transition to sarcopenia and determinants of transitions in older adults: A population-based study (2013) J Gerontol A Biol Sci Med Sci., 69, pp. 751-758; Hirani, V., Blyth, F., Naganathan, V., Sarcopenia is associated with incident disability, institutionalization, and mortality in community-dwelling older men: The concord health and ageing in men project (2015…	Jones, G.; Menzies Institute for Medical Research, Private Bag 23, Australia; email: Graeme.Jones@utas.edu.au			Oxford University Press					10795006		JGASF	28958061	English	J. Gerontol. Ser. A Biol. Sci. Med. Sci.
19	Barrett A., Pack A.	57215046629;57215049333;	Not quite eye to A.I.: student and teacher perspectives on the use of generative artificial intelligence in the writing process	2023	International Journal of Educational Technology in Higher Education	20	1	59				3	10.1186/s41239-023-00427-0	https://www.scopus.com/inward/record.uri?eid=2-s2.0-85176125600&doi=10.1186%2fs41239-023-00427-0&partnerID=40&md5=706bc84a69fd9162f0d20c20a3d29719	College of Education, Florida State University, Stone Building, 114 West Call Street, Tallahassee, FL 32306, United States; Faculty of Education and Social Work, Brigham Young University-Hawaii, 55-220 Kulanui Street, Laie, HI 96762, United States	Barrett, A., College of Education, Florida State University, Stone Building, 114 West Call Street, Tallahassee, FL 32306, United States; Pack, A., Faculty of Education and Social Work, Brigham Young University-Hawaii, 55-220 Kulanui Street, Laie, HI 96762, United States	Generative artificial intelligence (GenAI) can be used to author academic texts at a similar level to what humans are capable of, causing concern about its misuse in education. Addressing the role of GenAI in teaching and learning has become an urgent task. This study reports the results of a survey comparing educators’ (n = 68) and university students’ (n = 158) perceptions on the appropriate us…	Academic integrity; Artificial intelligence; GPT; Large language model; Writing education																	Carlson, M., Pack, A., Escalante, J., Utilizing OpenAI’s GPT-4 for written feedback (2023) TESOL Journal; Baker, R.S., Hawn, A., Algorithmic bias in education (2021) International Journal of Artificial Intelligence in Education, 32, pp. 1052-1092; Bland, J., Altman, D., Statistics notes: Cronbach's alpha (1997) BMJ, 314, p. 275; Bonner, E., Lege, R., Frazier, E., Large language model-based artifi…	Barrett, A.; College of Education, Stone Building, 114 West Call Street, United States; email: abarrett3@fsu.edu			Springer Science and Business Media Deutschland GmbH					23659440				English	Int. j. educ. technol. high. educ.
20	Bauer E., Greisel M., Kuznetsov I., Berndt M., Kollar I., Dresel M., Fischer M.R., Fischer F.	57205740095;57203971292;57022189200;57195348036;18037592100;9248599200;7402920954;35760191600;	Using natural language processing to support peer-feedback in the age of artificial intelligence: A cross-disciplinary framework and a research agenda	2023	British Journal of Educational Technology	54	5		1222	1245		19	10.1111/bjet.13336	https://www.scopus.com/inward/record.uri?eid=2-s2.0-85159390030&doi=10.1111%2fbjet.13336&partnerID=40&md5=72a1e59f0a1bc1c73ecdea963a6582b1	Department of Psychology, Ludwig-Maximilians-Universität München, Munich, Germany; School of Social Sciences and Technology, Technical University of Munich, Munich, Germany; Faculty for Philosophy and Social Sciences, University of Augsburg, Augsburg, Germany; Ubiquitous Knowledge Processing Lab, Department of Computer Science and Hessian Center for AI (hessian.AI), Technical University of Darmst…	Bauer, E., Department of Psychology, Ludwig-Maximilians-Universität München, Munich, Germany, School of Social Sciences and Technology, Technical University of Munich, Munich, Germany; Greisel, M., Faculty for Philosophy and Social Sciences, University of Augsburg, Augsburg, Germany; Kuznetsov, I., Ubiquitous Knowledge Processing Lab, Department of Computer Science and Hessian Center for AI (hess…	Advancements in artificial intelligence are rapidly increasing. The new-generation large language models, such as ChatGPT and GPT-4, bear the potential to transform educational approaches, such as peer-feedback. To investigate peer-feedback at the intersection of natural language processing (NLP) and educational research, this paper suggests a cross-disciplinary framework that aims to facilitate …	adaptivity; artificial intelligence; digital learning; large language models; learner support; natural language processing; peer-feedback	Artificial intelligence; Computational linguistics; Computer aided instruction; E-learning; Learning systems; Terminology; Adaptivity; Digital-learning; Feedback process; Language model; Language processing; Large language model; Learner support; Natural language processing; Natural languages; Peer feedback; Natural language processing systems					FMM120‐2020; Deutsche Forschungsgemeinschaft, DFG: FOR 2385; Bundesministerium für Bildung und Forschung, BMBF: 16DHL1040	This research was supported by the German Federal Ministry of Research and Education (FAMULUS‐Project 16DHL1040), Deutsche Forschungsgemeinschaft (DFG FOR 2385) and Stiftung Innovation in der Hochschullehre (FMM120‐2020). Open Access funding enabled and organized by Projekt DEAL.										Aben, J.E., Dingyloudi, F., Timmermans, A.C., Strijbos, J.W., Embracing errors for learning: Intrapersonal and interpersonal factors in feedback provision and processing in dyadic interactions (2019) The impact of feedback in higher education, pp. 107-125. , https://doi.org/10.1007/978-3-030-25112-3_7, M. Henderson, R. Ajjawi, D. Boud, E. Molloy, (Eds.),, Palgrave Macmillan; Aben, J.E.J., Timmerm…
21	Bego C.R.	57195966872;	Using ChatGPT for Homework: Does it Feel Like Cheating? (WIP)	2023	Proceedings - Frontiers in Education Conference, FIE								10.1109/FIE58773.2023.10343397	https://www.scopus.com/inward/record.uri?eid=2-s2.0-85183052849&doi=10.1109%2fFIE58773.2023.10343397&partnerID=40&md5=2811eb71ab40f20127391f8f4ee6e466	J. B. Speed School of Engineering, University of Louisville, Department of Engineering Fundamentals, United States	Bego, C.R., J. B. Speed School of Engineering, University of Louisville, Department of Engineering Fundamentals, United States	This WIP paper disseminates the results of an anonymous survey given to first-year engineering students in February of 2023 about ChatGPT, the recently-developed artificial intelligence chatbot. Survey results showed that some engineering students had used ChatGPT to complete their homework assignments. Furthermore, only a few of those who used it for homework felt like they were 'cheating,' or a…	AI; ChatGPT; engineering education; ethics																							LeCun, Y., Bengio, Y., Hinton, G., Deep learning (2015) Nature, 521 (7553), pp. 436-444. , https://www.nature.com/articles/nature14539, Accessed: May 18 2023; Hughes, A., ChatGPT: Everything you need to know about OpenAI's GPT-4 tool BBC Science Focus, , https://www.sciencefocus.com/future-technology/gpt-3/, May 05, 2023. Accessed: May 21 2023; Abdullah, M., Madain, A., Jararweh, Y., (2023) ChatG…	Bego, C.R.; J. B. Speed School of Engineering, United States; email: campbell.bego@louisville.edu		American Society for Engineering Education (ASEE)/Educational Research and Methods Divison (ERM);IEEE;IEEE Computer Society;IEEE Education Society	Institute of Electrical and Electronics Engineers Inc.	53rd IEEE ASEE Frontiers in Education International Conference, FIE 2023	18 October 2023 through 21 October 2023		196211
22	Bernabei M., Colabianchi S., Falegnami A., Costantino F.	57280498100;57224642253;57200073110;55229777600;	Students’ use of large language models in engineering education: A case study on technology acceptance, perceptions, efficacy, and detection chances	2023	Computers and Education: Artificial Intelligence	5		100172				4	10.1016/j.caeai.2023.100172	https://www.scopus.com/inward/record.uri?eid=2-s2.0-85173847244&doi=10.1016%2fj.caeai.2023.100172&partnerID=40&md5=f3e7b2827c3a07ffb65ec72e05b610b9	Department of Mechanical and Aerospace Engineering, Sapienza University of Rome, Via Eudossiana 18, Rome, 00184, Italy; Department of Computer, Control, and Management Engineering Antonio Ruberti, Sapienza University of Rome, Via Ariosto 25, Rome, 00185, Italy; Management Engineering Faculty, Uninettuno University, Corso Vittorio Emanuele II 39 00186, Rome, Italy	Bernabei, M., Department of Mechanical and Aerospace Engineering, Sapienza University of Rome, Via Eudossiana 18, Rome, 00184, Italy; Colabianchi, S., Department of Computer, Control, and Management Engineering Antonio Ruberti, Sapienza University of Rome, Via Ariosto 25, Rome, 00185, Italy; Falegnami, A., Management Engineering Faculty, Uninettuno University, Corso Vittorio Emanuele II 39 00186,…	The accessibility of advanced Artificial Intelligence-based tools, like ChatGPT, has made Large Language Models (LLMs) readily available to students. These LLMs can generate original written content to assist students in their academic assessments. With the rapid adoption of LLMs, exemplified by the popularity of OpenAI's ChatGPT, there is a growing need to explore their application in education.…	ChatGPT; Essay generation; Higher education; LLM	Computational linguistics; Education computing; Engineering education; Learning systems; Application in education; Case-studies; ChatGPT; Essay generation; High educations; High quality; Language model; Large language model; Learning tool; Technology acceptance; Students																						Afonso, C.M., Roldán, J.L., Sánchez-Franco, M., O, M.D., The moderator role of gender in the unified theory of acceptance and use of technology (UTAUT): A study on users of electronic document management systems (2012) 7th international conference on partial least squares and related methods, pp. 1-8; Alqahtani, T., Badreldin, H.A., Alrashed, M., Alowais, S.A., Alshaya, O.A., Rahman, I., Al, M.S.…	Costantino, F.Via Ariosto 25, Italy; email: francesco.costantino@uniroma1.it			Elsevier B.V.
23	Bhayana R., Krishna S., Bleakney R.R.	6506872404;57200833091;6603253365;	Performance of ChatGPT on a Radiology Board-style Examination: Insights into Current Strengths and Limitations	2023	Radiology	307	5	e230582				80	10.1148/radiol.230582	https://www.scopus.com/inward/record.uri?eid=2-s2.0-85163896892&doi=10.1148%2fradiol.230582&partnerID=40&md5=7602f76400ca0128d395017c84084f39	The University Medical Imaging Toronto, Joint Department of Medical Imaging, University Health Network, Mount Sinai Hospital, Women’s College Hospital, University of Toronto, Toronto General Hospital, 200 Elizabeth St, Peter Mulk Building, 1st Fl, Toronto, ON M5G 24C, Canada	Bhayana, R., The University Medical Imaging Toronto, Joint Department of Medical Imaging, University Health Network, Mount Sinai Hospital, Women’s College Hospital, University of Toronto, Toronto General Hospital, 200 Elizabeth St, Peter Mulk Building, 1st Fl, Toronto, ON M5G 24C, Canada; Krishna, S., The University Medical Imaging Toronto, Joint Department of Medical Imaging, University Health N…	Background: ChatGPT is a powerful artificial intelligence large language model with great potential as a tool in medical practice and education, but its performance in radiology remains unclear. Purpose: To assess the performance of ChatGPT on radiology board–style examination questions without images and to explore its strengths and limitations. Materials and Methods: In this exploratory prospec…		Article; calculation; Canada; ChatGPT; computer assisted tomography; controlled study; exploratory research; human; Internet; intervention study; prospective study; psychometry; radiodiagnosis; radiology board style examination; scoring system; thyroid nodule; artificial intelligence; radiography; radiology; Artificial Intelligence; Canada; Humans; Prospective Studies; Radiography; Radiology																Introducing ChatGPT. OpenAI, , https://openai.com/blog/chatgpt/, Published November 30, 2022. Accessed February 25, 2023; Sallam, M., The Utility of ChatGPT as an Example of Large Language Models in Healthcare Education, Research and Practice: Systematic Review on the Future Perspectives and Potential Limitations, , https://www.medrxiv.org/content/10.1101/2023.02.19.23286155, medRxiv 2023.02.19.2…	Bhayana, R.; The University Medical Imaging Toronto, 200 Elizabeth St, Peter Mulk Building, 1st Fl, Canada; email: rajesh.bhayana@uhn.ca			Radiological Society of North America Inc.					338419		RADLA	37191485	English	Radiology
24	Biela W., Warczak A., Mucha A., Malarz A.	57210432802;56238858700;57210432943;6508054637;	Enhanced Ar-K X-ray emission observed in EBIT at electron energies around 6,500 eV	2019	X-Ray Spectrometry	48	6		696	699		2	10.1002/xrs.3110	https://www.scopus.com/inward/record.uri?eid=2-s2.0-85070714912&doi=10.1002%2fxrs.3110&partnerID=40&md5=9334f9f391289f51755fac40bbc7ea46	Institute of Physics, Jagiellonian University, Krakow, Poland	Biela, W., Institute of Physics, Jagiellonian University, Krakow, Poland; Warczak, A., Institute of Physics, Jagiellonian University, Krakow, Poland; Mucha, A., Institute of Physics, Jagiellonian University, Krakow, Poland; Malarz, A., Institute of Physics, Jagiellonian University, Krakow, Poland	Recently (2015) at the Institute of Physics of the Jagiellonian University, a commercial electron beam ion source (Dresden EBIT, DREEBIT Co.) was installed for teaching and scientific purposes. The first experiments were focused on observation of radiative recombination and dielectronic recombination (DR). A good resolution of the X-ray spectra for DR in argon encouraged a more detailed search. A…		Dissociation; Electromagnetic wave emission; Electron beams; Electron energy levels; Electrons; Ion beams; Ion sources; X ray scattering; Dielectronic recombinations; Dresdens; Electron beam ion source; Electrons energy; Higher order resonances; Institute of Physics; Jagiellonian University; K X-ray emission; Radiative recombination; X ray spectrum; Argon					MNiSzW Nr 7150/E‐338/M/2018	This work was funded by Ministerstwo Nauki i Szkolnictwa Wyzszego (Grant MNiSzW Nr 7150/E‐338/M/2018).										Tanis, J.A., Graham, W.G., Stockli, M.P., Clark, M., McFarland, R.H., Morgan, T.J., Berkner, K.H., Stearns, J.W., (1984) Phys. Rev. Lett., 53, p. 2551; Zaharakis, K.E., Haar, R.R., Woitke, O., Zhu, M., Tanis, J.A., Badnell, N.R., (1995) Phys. Rev. A, 52, p. 2910; Beilmann, C., Mokler, P.H., Bernitt, S., Harman, Z., Keitel, C.H., Postavaru, O., Ullrich, J., Crespo Lóper-Urrutia, J.R., (2011) Physi…	Biela, W.; Institute of Physics, Poland; email: weronika.biela@student.uj.edu.pl			John Wiley and Sons Ltd					498246		XRSPA		English	X-Ray Spectrom.
25	Böhm K., Schedlberger L.-M.	8690366600;58788941300;	The use of Generative AI in the domain of human creations – a case for co-evolution?	2023	CEUR Workshop Proceedings	3598			90	102				https://www.scopus.com/inward/record.uri?eid=2-s2.0-85181134921&partnerID=40&md5=9e6d9dfbc3efaa13da3b8e8f8e75c582	FH Kufstein Tirol, University of Applied Sciences, Andreas-Hofer-Str. 7, Kufstein, 6330, Austria	Böhm, K., FH Kufstein Tirol, University of Applied Sciences, Andreas-Hofer-Str. 7, Kufstein, 6330, Austria; Schedlberger, L.-M., FH Kufstein Tirol, University of Applied Sciences, Andreas-Hofer-Str. 7, Kufstein, 6330, Austria	The appearance and sudden success of generative technologies and, within this domain, Large Language Models (LLMs) have generated many open questions about the benefits and challenges of those technologies and the approaches to deal with them in the future. Put into context, we can see a new level of dialog ability and contextual understanding that is new to the interaction between the human user…	Co-evolution; Generative Technologies; Higher Education; Human Creativity; Software Development	Engineering education; Software design; Application area; Benefit and challenges; Co-evolution; Contextual understanding; Generative technologies; High educations; Human creativity; Human users; Language model; Application programs						The authors would like to thank the University of Applied Kufstein Tirol for supporting the research and the reviewers of an earlier version for their valuable suggestions that helped to improve the quality of the paper.																Vaswani, A., Shazeer, N., Parmar, N., Uszkoreit, J., Jones, L., Gomez, A.N., Kaiser, L., Polosukhin, I., (2023) Attention Is All You Need, , https://doi.org/10.48550/arXiv.1706.03762; Radford, A., Narasimhan, K., (2018) Improving Language Understanding by Generative Pre-Training, , https://www.semanticscholar.org/paper/Improving-Language-Understandingby-Generative-Radford-Narasimhan/cd18800a0fe0b…		Bednar P.Bednar P.Zaghloul F.Welch C.Nolte A.Nolte A.Rajanen M.Islind A.S.Hult V.H.Hult H.V.Ravarini A.Braccini A.M.		CEUR-WS	9th International Conference on Socio-Technical Perspective in Information Systems Development, STPIS 2023	27 October 2023 through 28 October 2023		195720
26	Bozkurt A.	56566181600;	Unleashing the Potential of Generative AI, Conversational Agents and Chatbots in Educational Praxis: A Systematic Review and Bibliometric Analysis of GenAI in Education	2023	Open Praxis	15	4		261	270		2	10.55982/openpraxis.15.4.609	https://www.scopus.com/inward/record.uri?eid=2-s2.0-85188904654&doi=10.55982%2fopenpraxis.15.4.609&partnerID=40&md5=0a47fe9b34ed8b9d269cb1116e6d9947	Anadolu University, Turkey	Bozkurt, A., Anadolu University, Turkey	In the rapidly evolving landscape of education, the pivotal axis around which transformation revolves is human-AI interaction. In this sense, this paper adopts a data mining and analytic approach to understand what the related literature tells us regarding the trends and patterns of generative AI research in educational praxis. Accordingly, this systematic exploration spotlights the following res…	AI; artificial intelligence; bibliometric analysis; chatbots; ChatGPT; conversational agents; education; educational technology; GenAI; Generative AI; generative pre-trained transformer; GPT; higher education; large language models; learning; LLMs; natural language processing; systematic review; teaching						Anadolu Üniversitesi, Anadolu: SBA-2023-1852	This paper is funded by Anadolu University with grant number SBA-2023-1852.										Ansari, A. N., Ahmad, S., Bhutta, S. M., Mapping the global evidence around the use of ChatGPT in higher education: A systematic scoping review (2023) Education and Information Technologies, pp. 1-41. , https://doi.org/10.1007/s10639-023-12223-4; Bahroun, Z., Anane, C., Ahmed, V., Zacca, A., Transforming Education: A Comprehensive Review of Generative Artificial Intelligence in Educational Settin…	Bozkurt, A.; Anadolu UniversityTurkey; email: arasbozkurt@gmail.com			International Council for Open and Distance Education					13699997				English	Open. Prax.
27	Brennan G., O’Boyle R., Cookson J., Brewer M.	57204187667;57204180037;57204171574;56017287300;	Paradigm shift: Motivations for qualified legal professionals to undertake academic study	2019	Law Teacher	53	1		70	89		1	10.1080/03069400.2018.1489995	https://www.scopus.com/inward/record.uri?eid=2-s2.0-85054863211&doi=10.1080%2f03069400.2018.1489995&partnerID=40&md5=bbc1aac8bacbbd3f5b30143c7d626750	The Education Department, Law Society of Ireland, Dublin 7, Ireland; School of Law, Northumbria University, Newcastle on Tyne, United Kingdom; Sheffield Business School, Sheffield Hallam University, Sheffield, United Kingdom	Brennan, G., The Education Department, Law Society of Ireland, Dublin 7, Ireland; O’Boyle, R., The Education Department, Law Society of Ireland, Dublin 7, Ireland; Cookson, J., School of Law, Northumbria University, Newcastle on Tyne, United Kingdom; Brewer, M., Sheffield Business School, Sheffield Hallam University, Sheffield, United Kingdom	This paper considers the factors that motivate qualified legal professionals to undertake a further legal academic programme of study. The paper analyses the findings of a recent study concerning a post-graduate research degree collaboration between Northumbria University (NU) and the Law Society of Ireland (LSI) whereby NU’s longstanding LLM Advanced Legal Practice (LLM ALP) has been offered in …	Continued professional legal education; Post-professional education; Student motivations																	Shulman, L., (2005) The Signature Pedagogies of the Professions of Law, Medicine, Engineering, and the Clergy: Potential Lessons for the Education of Teachers, , Math Science Partnerships (MSP) Workshop, National Research Council, California, 6–8 February; Shulman, L.S., Signature Pedagogies in the Professions (2005) Daedalus, 134 (3), p. 52; Simmonds, P., Continuing Professional Development and …	O’Boyle, R.; The Education Department, United Kingdom; email: r.oboyle@lawsociety.ie			Routledge					3069400				English	Law Teach.
28	Calafato R.	57204708350;	Charting the motivation, self-efficacy beliefs, language learning strategies, and achievement of multilingual university students learning Arabic as a foreign language	2023	Asian-Pacific Journal of Second and Foreign Language Education	8	1	20				2	10.1186/s40862-023-00194-5	https://www.scopus.com/inward/record.uri?eid=2-s2.0-85164188926&doi=10.1186%2fs40862-023-00194-5&partnerID=40&md5=f54d472b9d7f7e6f1774db874630cdca	Department of Languages and Literature Studies, Faculty of Humanities, Sports, and Educational Science, University of South-Eastern Norway, Grønland, Drammen, 58 3045, Norway	Calafato, R., Department of Languages and Literature Studies, Faculty of Humanities, Sports, and Educational Science, University of South-Eastern Norway, Grønland, Drammen, 58 3045, Norway	Research on the relationship between students’ language learning motivation (LLM), language learning strategies (LLS), self-efficacy beliefs (SEB), and achievement in non-European languages has been both limited and overwhelmingly cross-sectional, often with little attention paid to their multilingualism. Combining complex dynamic systems and sociocultural perspectives, this article reports on a …	Arabic; Foreign languages; Language learning strategies; Motivation; Multilingual competence; Self-efficacy beliefs																	Adnan, M.A., Mohamad, S., Language learning strategies and self-efficacy belief in Arabic language learning: A Malaysian context (2011) ASEAN Journal of Teaching & Learning in Higher Education, 3 (2), pp. 48-59; Alkhateeb, H.M., Reading anxiety, classroom anxiety, language motivation, reader self-perception, and Arabic achievement of Arab-American students learning Arabic as a second language (20…	Calafato, R.; Department of Languages and Literature Studies, Grønland, Norway; email: Raees.Calafato@usn.no			Springer Science and Business Media B.V.					23635169				English	Asian Pac. J. Second Foreign Lang. Edu.
29	Calafato R.	57204708350;	“I'm a salesman and my client is China”: Language learning motivation, multicultural attitudes, and multilingualism among university students in Kazakhstan and Uzbekistan	2021	System	103		102645				15	10.1016/j.system.2021.102645	https://www.scopus.com/inward/record.uri?eid=2-s2.0-85114916959&doi=10.1016%2fj.system.2021.102645&partnerID=40&md5=863688f193696884ba07756620825b19	Department of Foreign Languages, University of Bergen, HF‐bygget, Sydnesplassen 7, Bergen, 5020, Norway	Calafato, R., Department of Foreign Languages, University of Bergen, HF‐bygget, Sydnesplassen 7, Bergen, 5020, Norway	The Central Asian republics represent an interesting yet little-studied space for researching the interplay between language learning motivation (LLM), multiculturalism, and multilingualism given their cultural and linguistic diversity and official promotion of multilingualism and positive multicultural attitudes through language learning initiatives in schools and universities. This article repo…	Foreign languages; Gender; Integrativeness; International posture; Multiculturalism; Multilingualism							I would like to express my heartfelt thanks to the teachers who helped with recruiting participants for the study and the students who eventually participated. I would also like to thank the journal's editors for their professionalism and approachability and the three anonymous reviewers for their helpful comments and advice on this paper.										Al-Hoorie, A.H., The L2 motivational self system: A meta-analysis (2018) Studies in Second Language Learning and Teaching, 8 (4), pp. 721-754; Publication manual of the American psychological association (2010), 6th ed. American Psychological Association; Amorati, R., Accessing a global community through L2 learning: A comparative study on the relevance of international posture to EFL and LOTE st…				Elsevier Ltd					0346251X				English	System
30	Calonge D.S., Smail L., Kamalov F.	55091052400;20434345600;55821119700;	Enough of the chit-chat: A comparative analysis of four AI chatbots for calculus and statistics	2023	Journal of Applied Learning and Teaching	6	2		346	357		5	10.37074/jalt.2023.6.2.22	https://www.scopus.com/inward/record.uri?eid=2-s2.0-85178945661&doi=10.37074%2fjalt.2023.6.2.22&partnerID=40&md5=cb48d94daafc9f0113df572a7b748f6a	Department of Academic Development, Mohamed bin Zayed University of Artificial Intelligence, Abu Dhabi, United Arab Emirates; College of Interdisciplinary Studies, Zayed University, Dubai, United Arab Emirates; School of Engineering, Applied Science and Technology, Canadian University, Dubai, United Arab Emirates	Calonge, D.S., Department of Academic Development, Mohamed bin Zayed University of Artificial Intelligence, Abu Dhabi, United Arab Emirates; Smail, L., College of Interdisciplinary Studies, Zayed University, Dubai, United Arab Emirates; Kamalov, F., School of Engineering, Applied Science and Technology, Canadian University, Dubai, United Arab Emirates	This article presents a comparative analysis of four AI chatbots with potential utilization in the fields of mathematics education and statistics, namely ChatGPT, GPT-4, Bard, and LLaMA. Our objective is to evaluate and compare the features, functionalities, and potential applications of these platforms within the domains of calculus and statistics. By examining their strengths and limitations, t…	AI chatbots; Bard; calculus; ChatGPT; comparative analysis; GPT-4; Large Language Models (LLMs); LlaMA; statistics; student learning																	Abramski, K., Citraro, S., Lombardi, L., Rossetti, G., Stella, M., Cognitive network science reveals bias in GPT-3, GPT-3.5 Turbo, and GPT-4 Mirroring math anxiety in high-school students (2023) Big Data and Cognitive Computing, 7 (3), p. 124. , https://doi.org/10.3390/bdcc703012424; Carlander-Reuterfelt, D., Carrera, Á., Iglesias, C. A., Araque, Ó., Rada, J. F. S., Muñoz, S., JAICOB: A data scie…				Kaplan Singapore					2591801X				English	J. Appl. Learn. Teach.
31	Chen A., Yu Z., Yang X., Guo Y., Bian J., Wu Y.	58036480100;57226392302;57203172777;57216597174;7103200005;55645924700;	Contextualized medication information extraction using Transformer-based deep learning architectures	2023	Journal of Biomedical Informatics	142		104370				4	10.1016/j.jbi.2023.104370	https://www.scopus.com/inward/record.uri?eid=2-s2.0-85153577793&doi=10.1016%2fj.jbi.2023.104370&partnerID=40&md5=d19cbfaa222f46f3892e229290c455e5	Department of Health Outcomes and Biomedical Informatics, College of Medicine, University of Florida, Gainesville, FL, United States; Cancer Informatics Shared Resource, University of Florida Health Cancer Center, Gainesville, FL, United States	Chen, A., Department of Health Outcomes and Biomedical Informatics, College of Medicine, University of Florida, Gainesville, FL, United States, Cancer Informatics Shared Resource, University of Florida Health Cancer Center, Gainesville, FL, United States; Yu, Z., Department of Health Outcomes and Biomedical Informatics, College of Medicine, University of Florida, Gainesville, FL, United States; Y…	Objective: To develop a natural language processing (NLP) system to extract medications and contextual information that help understand drug changes. This project is part of the 2022 n2c2 challenge. Materials and methods: We developed NLP systems for medication mention extraction, event classification (indicating medication changes discussed or not), and context classification to classify medicat…	Clinical natural language processing; Deep learning; Medication information extraction; Named entity recognition; Text classification	Character recognition; Classification (of information); Computational linguistics; Deep learning; Information retrieval; Information use; Text processing; Clinical natural language processing; Context classification; Deep learning; Events classification; Language processing; Medication information extraction; Named entity recognition; Natural languages; Text classification; Transformer modeling; …					National Institute of Mental Health, NIMH: 1R01MH121907; National Institute on Drug Abuse, NIDA: 1R01DA050676; Centers for Disease Control and Prevention, CDC: 1U18DP006512; National Institute on Aging, NIA: 1R56AG069880, R21AG068717; National Cancer Institute, NCI: 1R01CA246418, 1R21CA245858-01A1, R21CA253394-01A1; Patient-Centered Outcomes Research Institute, PCORI: ME-2018C3-14754; Nvidia	We would like to thank the n2c2 organizers to provide the annotated corpus and the guidance for this challenge. We gratefully acknowledge the support of NVIDIA Corporation with the donation of the GPUs used for this research.	This study was partially supported by grants from the Patient-Centered Outcomes Research Institute® (PCORI®) (ME-2018C3-14754), the National Institute on Aging (1R56AG069880, R21AG068717), the National Cancer Institute (1R01CA246418, 3R01CA246418-02S1, 1R21CA245858-01A1, R21CA245858-01A1S1, R21CA253394-01A1, R21CA253394-01A1), National Institute on Drug Abuse (1R01DA050676), National Institute of…									Xu, H., Stenner, S.P., Doan, S., MedEx: a medication information extraction system for clinical narratives (2010) J. Am. Med. Inform. Assoc., 17, pp. 19-24; Kinlay, M., Zheng, W.Y., Burke, R., Medication errors related to computerized provider order entry systems in hospitals and how they change over time: A narrative review (2021) Res Soc. Adm. Pharm., 17, pp. 1546-1552; Uzuner, Ö., Solti, I., C…	Wu, Y.; Clinical and Translational Research Building, 2004 Mowry Road, PO Box 100177, United States; email: yonghui.wu@ufl.edu			Academic Press Inc.					15320464		JBIOB	37100106	English	J. Biomed. Informatics
32	Chervenak J., Lieman H., Blanco-Breindel M., Jindal S.	57220346260;6507275170;58479740800;55432383700;	The promise and peril of using a large language model to obtain clinical information: ChatGPT performs strongly as a fertility counseling tool with limitations	2023	Fertility and Sterility	120	3		575	583		15	10.1016/j.fertnstert.2023.05.151	https://www.scopus.com/inward/record.uri?eid=2-s2.0-85161630677&doi=10.1016%2fj.fertnstert.2023.05.151&partnerID=40&md5=3d753183ee83a98cf816a106ef3b5c3e	Albert Einstein College of Medicine/Montefiore's Institute for Reproductive Medicine and Health, Hartsdale, New York, United States	Chervenak, J., Albert Einstein College of Medicine/Montefiore's Institute for Reproductive Medicine and Health, Hartsdale, New York, United States; Lieman, H., Albert Einstein College of Medicine/Montefiore's Institute for Reproductive Medicine and Health, Hartsdale, New York, United States; Blanco-Breindel, M., Albert Einstein College of Medicine/Montefiore's Institute for Reproductive Medicine …	Objective: To compare the responses of the large language model-based “ChatGPT” to reputable sources when given fertility-related clinical prompts. Design: The “Feb 13” version of ChatGPT by OpenAI was tested against established sources relating to patient-oriented clinical information: 17 “frequently asked questions (FAQs)” about infertility on the Centers for Disease Control (CDC) Website, 2 va…	Artificial intelligence; counseling; fertility knowledge; natural language processing; online	adult; Article; artificial intelligence; clinical article; controlled study; counseling; disease control; female; fertility; gamete intrafallopian transfer; human; infertility therapy; language ability; machine learning; male; medical informatics; multiple choice test; natural language processing; outcome assessment; reproduction; sentiment analysis; university hospital; counseling; fertility; in…																Pallen, M., Introducing the Internet (1995) BMJ, 311, pp. 1422-1424; Huang, J.Y.J., Discepola, F., Al-Fozan, H., Tulandi, T., Quality of fertility clinic websites (2005) Fertil Steril, 83, pp. 538-544; Google Search Results for “Infertility” and “Fertility” http://www.google.com, Available at: (Accessed 20 February 2023); Sun, Y., Zhang, Y., Gwizdka, J., Trace, C.B., Consumer evaluation of the qu…	Chervenak, J.; Albert Einstein College of Medicine/Montefiore's Institute for Reproductive Medicine, 141 S Central Ave, United States; email: joseph.chervenak@gmail.com			Elsevier Inc.					150282		FESTA	37217092	English	Fertil. Steril.
33	Cheung B.H.H., Lau G.K.K., Wong G.T.C., Lee E.Y.P., Kulkarni D., Seow C.S., Wong R., Co M.T.-H.	56516330600;58307574200;19637815700;55330110400;55991853500;58584816400;58307574400;54915588000;	ChatGPT versus human in generating medical graduate exam multiple choice questions—A multinational prospective study (Hong Kong S. A.R., Singapore, Ireland, and the United Kingdom)	2023	PLoS ONE	18	8 August	e0290691				9	10.1371/journal.pone.0290691	https://www.scopus.com/inward/record.uri?eid=2-s2.0-85168979658&doi=10.1371%2fjournal.pone.0290691&partnerID=40&md5=a1be378fa16f3df02388995e5ea9a9f9	L.K.S. Faculty of Medicine, University of Hong Kong, Hong Kong, Hong Kong; Department of Surgery, University of Edinburgh, Edinburgh, United Kingdom; Department of Surgery, National University Cancer Institute Singapore, Singapore, Singapore; Department of Surgery, University of Galway, Galway, Ireland	Cheung, B.H.H., L.K.S. Faculty of Medicine, University of Hong Kong, Hong Kong, Hong Kong; Lau, G.K.K., L.K.S. Faculty of Medicine, University of Hong Kong, Hong Kong, Hong Kong; Wong, G.T.C., L.K.S. Faculty of Medicine, University of Hong Kong, Hong Kong, Hong Kong; Lee, E.Y.P., L.K.S. Faculty of Medicine, University of Hong Kong, Hong Kong, Hong Kong; Kulkarni, D., Department of Surgery, Univer…	Introduction Large language models, in particular ChatGPT, have showcased remarkable language processing capabilities. Given the substantial workload of university medical staff, this study aims to assess the quality of multiple-choice questions (MCQs) produced by ChatGPT for use in graduate medical examinations, compared to questions written by university professoriate staffs based on standard m…		article; ChatGPT; controlled study; Hong Kong; human; human experiment; Ireland; medical examination; medical staff; multicenter study; multiple choice test; prospective study; quality control; randomized controlled trial; Singapore; United Kingdom; workload; Hong Kong; Ireland; Singapore; United Kingdom; Hong Kong; Humans; Ireland; Prospective Studies; Singapore; United Kingdom																Nassar, AK, Reid, S, Kahnamoui, K, Tuma, F, Waheed, A, McConnell, M., Burnout among Academic Clinicians as It Correlates with Workload and Demographic Variables (2020) Behavioral Sciences, 10 (6), p. 94. , https://doi.org/10.3390/bs10060094, PMID: 32471265; Rao, SK, Kimball, AB, Lehrhoff, SR, Hidrue, MK, Colton, DG, Ferris, TG, The Impact of Administrative Burden on Academic Physicians: Results o…	Co, M.T.-H.; L.K.S. Faculty of Medicine, Hong Kong; email: mcth@hku.hk			Public Library of Science					19326203		POLNC	37643186	English	PLoS ONE
34	Chiknaverova K., Gazizova A., Mingazova N.	57212381324;56115073800;56177181800;	Selection of foreign language teaching content in Russian Master of Laws (LLM) graduate programs	2019	Journal of Research in Applied Linguistics	10	Special Issue		10	30		5		https://www.scopus.com/inward/record.uri?eid=2-s2.0-85076577462&partnerID=40&md5=a4a806b44a3645b40db677be8b77b356	The English Language Department, Faculty of Linguistics and Intercultural Communication, MGIMO University (Odintsovo branch), Moscow, Russian Federation; Foreign Languages Department, Institute for Economics, Management and Social Technologies, Kazan National Research Technical University named after A.N. Tupolev-KAI, Kazan, Russian Federation; Department of Contrastive Linguistics, Institute of …	Chiknaverova, K., The English Language Department, Faculty of Linguistics and Intercultural Communication, MGIMO University (Odintsovo branch), Moscow, Russian Federation; Gazizova, A., Foreign Languages Department, Institute for Economics, Management and Social Technologies, Kazan National Research Technical University named after A.N. Tupolev-KAI, Kazan, Russian Federation; Mingazova, N., Depar…	Master's degree was integrated into the system of Russian Higher Education several decades ago, however, teaching foreign languages at this level still needs further analysis including the postgraduate law students training. The article investigates the principal components of foreign language teaching in Master of laws Graduate Programs (considering the case of the English language) on the bases…	Foreign language teaching; Master of laws programs; Teaching content components																	Alekseeva, L.Y., (2007) Method of teaching a professionally oriented foreign language, , Course of lectures. Saint Petersburg: Philological Faculty of St. Petersburg State University; Bim, I.L., (1977) Methodology of teaching foreign languages as a science and problems of a school student, , Moscow: Russian language; Bim, I.L., (1988) Theory and practice of teaching German in secondary school. Pr…	Gazizova, A.; Foreign Languages Department, Russian Federation			Shahid Chamran University of Ahvaz					23453303				English	J. Res. Appl. Linguist. Stud.
35	Chovanec K., Fields J., Madiraju P.	56974425000;58812587800;6507994448;	Combining Demographic Tabular Data with BERT Outputs for Multilabel Text Classification in Higher Education Survey Data	2023	Proceedings - 2023 IEEE International Conference on Big Data, BigData 2023				1403	1409			10.1109/BigData59044.2023.10386843	https://www.scopus.com/inward/record.uri?eid=2-s2.0-85184987047&doi=10.1109%2fBigData59044.2023.10386843&partnerID=40&md5=e2eaae170d00b7827f71aa0e4d37a584	Marquette University, Office of Instutional Research and Analysis, Milwaukee, WI, United States; Concordia University Wisconsin - Ann Arbor, Business Analytics, Mequon, WI, United States; Marquette University, Computer Science, Milwaukee, WI, United States	Chovanec, K., Marquette University, Office of Instutional Research and Analysis, Milwaukee, WI, United States; Fields, J., Concordia University Wisconsin - Ann Arbor, Business Analytics, Mequon, WI, United States; Madiraju, P., Marquette University, Computer Science, Milwaukee, WI, United States	Institutions of Higher Education (HEI) often possess rich text data in the form of student surveys. However, because these data are expensive to process, many universities have not yet capitalized on this resource. When working with student text data, researchers often desire to first label student responses with common categories of interest, a task in Natural Language Processing known as Multi-…	BERT; Higher Education; Multilabel Text Classification; Student Surveys							We would like to thank the Office of Institutional Research and Analysis for generously providing the student survey data used in this study.										Zaitseva, E., Santhanam, E., Tucker, B., Discovering student experience (2021) Analysing Student Feedback in Higher Education: Using Text-Mining to Interpret the Student Voice, , New York, NY: Routledge; Porter, S.R., Do college student surveys have any validity? (2011) The Review of Higher Education, 35, pp. 45-76; Kanwar, A., Sanjeeva, M., Student satisfaction survey: A key for quality improvem…	Chovanec, K.; Marquette University, United States; email: kevin.chovanec@marquette.edu	He J.Palpanas T.Hu X.Cuzzocrea A.Dou D.Slezak D.Wang W.Gruca A.Lin J.C.-W.Agrawal R.	Ankura;IEEE Dataport	Institute of Electrical and Electronics Engineers Inc.	2023 IEEE International Conference on Big Data, BigData 2023	15 December 2023 through 18 December 2023		196820		9798350324457			English	Proc. - IEEE Int. Conf. Big Data, BigData
36	Chun J., Elkins K.	57219499833;37095285100;	THE CRISIS OF ARTIFICIAL INTELLIGENCE: A NEW DIGITAL HUMANITIES CURRICULUM FOR HUMAN-CENTRED AI	2023	International Journal of Humanities and Arts Computing	17	2		147	167			10.3366/ijhac.2023.0310	https://www.scopus.com/inward/record.uri?eid=2-s2.0-85178898335&doi=10.3366%2fijhac.2023.0310&partnerID=40&md5=d8c0531c3ee849c2ae55737aaa28197c		Chun, J.; Elkins, K.	This article outlines what a successful artificial intelligence digital humanities (AI DH) curriculum entails and why it is so critical now. Artificial intelligence is rapidly reshaping our world and is poised to exacerbate long-standing crises including (1) the crisis of higher education and the humanities, (2) the lack of diversity, equity and inclusion (DEI) in computer science and technology …	AI alignment; AI curriculum; AI ethics; AI safety; artificial intelligence; computational digital humanities; digital humanities; generative AI; large language models																	Marche, S., The college essay is dead: Nobody is prepared for how AI will transform academia (2022) The Atlantic Monthly, , https://www.theatlantic.com/technology/archive/2022/12/chatgpt-ai-writing-college-student-essays/672371/, (6 December), last accessed 13 May 2023; Productive teaching tool or innovative cheating (2023) Study.com, , https://study.com/resources/perceptions-of-chatgpt-in-school…				Edinburgh University Press					17538548				English	Int. J. Humanit. Arts Comput.
37	Cipriano B.P., Alves P.	57669691700;57209335077;	GPT-3 vs Object Oriented Programming Assignments: An Experience Report	2023	Annual Conference on Innovation and Technology in Computer Science Education, ITiCSE	1			61	67		7	10.1145/3587102.3588814	https://www.scopus.com/inward/record.uri?eid=2-s2.0-85166249787&doi=10.1145%2f3587102.3588814&partnerID=40&md5=8fcbd5dfa30329f8ff27fcb398c3a0ce	Lusófona University, COPELABS, Lisbon, Portugal	Cipriano, B.P., Lusófona University, COPELABS, Lisbon, Portugal; Alves, P., Lusófona University, COPELABS, Lisbon, Portugal	Recent studies show that AI-driven code generation tools, such as Large Language Models, are able to solve most of the problems usually presented in introductory programming classes. However, it is still unknown how they cope with Object Oriented Programming assignments, where the students are asked to design and implement several interrelated classes (either by composition or inheritance) that f…	GPT-3; large language models; object oriented programming; programming assignments; teaching	Computational linguistics; Education computing; Engineering education; Open source software; Open systems; Students; Code generation tools; Design and implements; Experience report; GPT-3; Introductory programming; Language model; Large language model; Objectoriented programming (OOP); Programming assignments; Programming class; Object oriented programming					UIDB/04111/2020	This research was funded by the Fundação para a Ciência e a Tec-nologia under Grant No.: UIDB/04111/2020 (COPELABS).										Alves, P., Cipriano, B.P., (2023) The centaur programmer-How Kasparov's Advanced Chess spans over to the software development of the future; Asare, O., Nagappan, M., Asokan, N., (2022) Is GitHub's Copilot as Bad As Humans at Introducing Vulnerabilities in Code, , https://doi.org/10.48550/arXiv.2204.04741; Becker, B.A., Denny, P., Finnie-Ansley, J., Luxton-Reilly, A., Prather, J., Santos, E.A., (2…			Association for Computing Machinery's (ACM) Special Interest Group on Computer Science Sducation (SIGCSE)	Association for Computing Machinery	28th Annual Conference on Innovation and Technology in Computer Science Education, ITiCSE 2023	8 July 2023 through 12 July 2023		190016	1942647X	9798400701382			English	Annu. Conf. Innov. Technol. Comput. Sci. Educ. ITiCSE
38	Cowling M., Crawford J., Allen K.-A., Wehmeyer M.	57188726168;57196083515;55582596300;36009212300;	Using leadership to leverage ChatGPT and artificial intelligence for undergraduate and postgraduate research supervision	2023	Australasian Journal of Educational Technology	39	4		89	103			10.14742/ajet.8598	https://www.scopus.com/inward/record.uri?eid=2-s2.0-85178409098&doi=10.14742%2fajet.8598&partnerID=40&md5=3d1d3a92a0f051b05bf3dac7d50b496c	CQ University, Australia; University of Tasmania, Australia; Monash University, Australia; The University of Kansas, United States	Cowling, M., CQ University, Australia; Crawford, J., University of Tasmania, Australia; Allen, K.-A., Monash University, Australia; Wehmeyer, M., The University of Kansas, United States	ChatGPT and other artificial intelligence (AI) and large language models (LLMs) have hit higher education by storm. Much of the research focuses on how this – and similar – tools can be leveraged for effective education of undergraduate coursework students. In this study, we explore the emerging benefits and limitations of ChatGPT and LLMs in the context of undergraduate and postgraduate research…	ChatGPT-3; doctoral student; generative AI; higher education; large language model; research student; research supervision							This article uses some text generated by the Open AI ChatGPT-3 (https://chat.openai.com/chat). Typically, when asking the AI questions, it lists multiple answers; in most cases we used only the summary paragraph it offered in the body of this document. Where we do use this content, we present it as a direct quote.																Abowd, G. D., Dey, A. K., Brown, P. J., Davies, N., Smith, M., Steggles, P., Towards a better understanding of context and context-awareness (1999) Lecture notes in compuer science: Vol. 1707. Handheld and ubiquitous computing, pp. 304-307. , https://link.springer.com/chapter/10.1007/3-540-48157-5_29, H.-W. Gellersen (Ed), –). Springer; Adams, N., Little, T.D., Ryan, R.M., Self-determination theo…	Crawford, J.; University of TasmaniaAustralia; email: Joseph.crawford@utas.edu.au			Australasian Society for Computers in Learning in Tertiary Education (ASCILITE)
39	Crawford J., Cowling M., Allen K.-A.	57196083515;57188726168;55582596300;	Leadership is needed for ethical ChatGPT: Character, assessment, and learning using artificial intelligence (AI)	2023	Journal of University Teaching and Learning Practice	20	3					95	10.53761/1.20.3.02	https://www.scopus.com/inward/record.uri?eid=2-s2.0-85151126783&doi=10.53761%2f1.20.3.02&partnerID=40&md5=e6d6f855fc347dfc08147a3e571c3ca4	University of Tasmania, Australia; Central Queensland University, Australia; Monash University, Australia	Crawford, J., University of Tasmania, Australia; Cowling, M., Central Queensland University, Australia; Allen, K.-A., Monash University, Australia	The OpenAI’s ChatGPT-3, or Chat Generative Pre-Trained Transformer was released in November 2022 without significant warning, and has taken higher education by storm since. The artificial intelligence (AI)-powered chatbot has caused alarm for practitioners seeking to detect authenticity of student work. Whereas some educational doomsayers predict the end of education in its current form, we propo…	academic integrity; artificial intelligence; ChatGPT; large language model; OpenAI; student character																							Abiodun, O. I., Jantan, A., Omolara, A. E., Dada, K. V., Mohamed, N. A., Arshad, H., State-of-the-art in artificial neural network applications: A survey (2018) Heliyon, 4 (11), p. e00938; Adams, D. R., Meyers, S. A., Beidas, R. S., The relationship between financial strain, perceived stress, psychological symptoms, and academic and social integration in undergraduate students (2016) Journal of A…				University of Wollongong
40	Crawford J., Cowling M., Ashton-Hay S., Kelder J.-A., Middleton R., Wilson G.S.	57196083515;57188726168;55996197300;8851824900;8985999300;24279153400;	Artificial Intelligence and Authorship Editor Policy: ChatGPT, Bard Bing AI, and beyond	2023	Journal of University Teaching and Learning Practice	20	5	1				6	10.53761/1.20.5.01	https://www.scopus.com/inward/record.uri?eid=2-s2.0-85161221342&doi=10.53761%2f1.20.5.01&partnerID=40&md5=105d43c92b9ea04b606352899a88a2f6	University of Tasmania, Australia; Central Queensland University, Australia; Southern Cross University, Australia; University of Wollongong, Australia	Crawford, J., University of Tasmania, Australia; Cowling, M., Central Queensland University, Australia; Ashton-Hay, S., Southern Cross University, Australia; Kelder, J.-A., University of Tasmania, Australia; Middleton, R., University of Wollongong, Australia; Wilson, G.S.	Artificial intelligence and large-language model chatbots have generated significant attention in higher education, and in research practice. Whether ChatGPT, Bard, Jasper Chat, Socratic, Bing AI, DialoGPT, or something else, these are all shaping how education and research occur. In this Editorial, we offer five editorial principles to guide decision-making for editors, which will also become po…	academic integrity; AI contributions; AI-informed research; editorial policy; ethical research; Large language model																							(2019) Authorship: A guide supporting the Australian Code for the Responsible Conduct of Research, , National Health and Medical Research Council; Awdry, R., Dawson, P., Sutherland-Smith, W., Contract cheating: To legislate or not to legislate-is that the question? (2022) Assessment & Evaluation in Higher Education, 47 (5), pp. 712-726; Azamfirei, R., Kudchadkar, S., Fackler, J., Large language m…				University of Wollongong
41	Crawford J., Vallis C., Yang J., Fitzgerald R., O'dea C.	57196083515;57316350300;55864866000;56492257500;56704753900;	Editorial: Artificial Intelligence is Awesome, but Good Teaching Should Always Come First.	2023	Journal of University Teaching and Learning Practice	20	7						10.53761/1.20.7.01	https://www.scopus.com/inward/record.uri?eid=2-s2.0-85176804505&doi=10.53761%2f1.20.7.01&partnerID=40&md5=64c3db63353ef9d7e73060fe09b535b6	University of Tasmania, Australia; University of Sydney, Australia; University of Warwick, United Kingdom; University of Queensland, Australia; University of Huddersfield, United Kingdom	Crawford, J., University of Tasmania, Australia; Vallis, C., University of Sydney, Australia; Yang, J., University of Warwick, United Kingdom; Fitzgerald, R., University of Queensland, Australia; O'dea, C., University of Huddersfield, United Kingdom	The explosion of generative artificial intelligence into the mainstream of society some twelve months ago has seriously challenged learning and teaching practice. Since then, AI companies such as OpenAI are constantly improving their language models and releasing new features to make them more capable and useful. So, given there have been many disruptors in the past and emerging disruptions in th…	AIED; Andragogy; Bard; ChatGPT; higher education; large language model																							Abeysekera, L., Dawson, P., Motivation and cognitive load in the flipped classroom: definition, rationale and a call for research (2015) Higher Education Research & Development, 34 (1), pp. 1-14. , https://doi.org/10.1080/07294360.2014.934336; Baker, J., The Classroom Flip: Becoming the “Guide by the Side”. [Presentation slides] (2000) Presentation at the CIC Information Technologies Workshop, , …				University of Wollongong
42	Črček N., Patekar J.	58795361400;57070343100;	Writing with AI: University Students' Use of ChatGPT	2023	Journal of Language and Education	9	4		128	138			10.17323/jle.2023.17379	https://www.scopus.com/inward/record.uri?eid=2-s2.0-85181468600&doi=10.17323%2fjle.2023.17379&partnerID=40&md5=be9ad94ac5c156400f65c031b8b65b30	RIT Croatia, Zagreb, Croatia	Črček, N., RIT Croatia, Zagreb, Croatia; Patekar, J., RIT Croatia, Zagreb, Croatia	Background: ChatGPT, a chatbot based on a large language model, captured global attention toward the end of 2022. With its potential to generate comprehensive texts of a variety of genres based on a string of straightforward prompts, it was soon perceived as a threat by many in various fields, including - and in particular - education. Schools across the world began banning its use as instructors…	academic honesty; academic integrity; artificial intelligence; ChatGPT; ethics; plagiarism																							Anitha, P., Sundaram, S., Prevalence, types and reasons for academic dishonesty among college students (2021) Journal of Studies in Social Sciences and Humanities, 7 (1), pp. 1-14; Bilić-Zulle, L., Frković, V., Turk, T., Ažman, J., Petrovečki, M., Prevalence of plagiarism among medical students (2005) Croatian Medical Journal, 46 (1), pp. 126-131. , http://www.cmj.hr/2005/46/1/15726686.htm; Brimb…	Patekar, J.; RIT CroatiaCroatia; email: jakob.patekar@outlook.com			National Research University, Higher School of Econoimics
43	De Paoli S.	25632080800;	Performing an Inductive Thematic Analysis of Semi-Structured Interviews With a Large Language Model: An Exploration and Provocation on the Limits of the Approach	2023	Social Science Computer Review							1	10.1177/08944393231220483	https://www.scopus.com/inward/record.uri?eid=2-s2.0-85179340594&doi=10.1177%2f08944393231220483&partnerID=40&md5=ccb7d6a13e958aff2c0e4f31bba9417b	Abertay University, United Kingdom	De Paoli, S., Abertay University, United Kingdom	Large Language Models (LLMs) have emerged as powerful generative Artificial Intelligence solutions. This paper presents results and reflections of an experiment done with the LLM GPT 3.5-Turbo to perform an inductive Thematic Analysis (TA). Previous research has worked on conducting deductive analysis. Thematic Analysis is a qualitative method for analysis commonly used in social sciences and it …	human- AI collaboration; large language models; qualitative research; thematic analysis																							Baden, C., Pipal, C., Schoonvelde, M., van der Velden, M.A.G., Three gaps in computational text analysis methods for social sciences: A research agenda (2022) Communication Methods and Measures, 16 (1), pp. 1-18. , https://doi.org/10.1080/19312458.2021.2015574; Braun, V., Clarke, V., Using thematic analysis in psychology (2006) Qualitative Research in Psychology, 3 (2), pp. 77-101. , https://doi.…	De Paoli, S.; Abertay UniversityUnited Kingdom; email: s.depaoli@abertay.ac.uk			SAGE Publications Inc.
44	de Vicente-Yagüe-Jara M.-I., López-Martínez O., Navarro-Navarro V., Cuéllar-Santiago F.	56217672100;6504611387;58763495200;58303764300;	Writing, creativity, and artificial intelligence. ChatGPT in the university context [Escritura, creatividad e inteligencia artificial. ChatGPT en el contexto universitario]	2023	Comunicar	31	77		47	57		2	10.3916/C77-2023-04	https://www.scopus.com/inward/record.uri?eid=2-s2.0-85179745137&doi=10.3916%2fC77-2023-04&partnerID=40&md5=1b4a97fd8998f6840eea4e2faa903224	Departamento de Didáctica de la Lengua y la Literatura, Universidad de Murcia, Spain; Departamento de Psicología Evolutiva y de la Educación, Universidad de Murcia, Spain; Departamento de Historia del Arte-Bellas Artes, Universidad de Salamanca, Spain; Departamento de Arte, Universidad Miguel Hernández de Elche, Spain	de Vicente-Yagüe-Jara, M.-I., Departamento de Didáctica de la Lengua y la Literatura, Universidad de Murcia, Spain; López-Martínez, O., Departamento de Psicología Evolutiva y de la Educación, Universidad de Murcia, Spain; Navarro-Navarro, V., Departamento de Historia del Arte-Bellas Artes, Universidad de Salamanca, Spain; Cuéllar-Santiago, F., Departamento de Arte, Universidad Miguel Hernández de…	The main objective of the research is to study the creative potential of Artificial Intelligence (AI) for writing skills in an educational context. The research aims to provide evidence on the use of AI and contribute to its integration in the classroom as a support for the teaching-learning process. Two types of research designs were established: a descriptive and comparative non-experimental qu…	ChatGPT; ChatGPT; creatividad verbal; enseñanza de lenguas; escritura; Inteligencia artificial; language teaching; Large Language Models; modelos de lenguaje extensivos. Artificial intelligence; verbal creativity; writing						E042-08; Federación Española de Enfermedades Raras, FEDER; Secretaría de Estado de Investigacion, Desarrollo e Innovacion, I+D+i: MCIN/AEI/10.13039/501100011033, PID2020-113731GB-I00; Universidad de Murcia	El estudio se ha realizado en el marco del proyecto de I+D+i «Creatividad verbal como dominio: diseño, validación y aplicación de una prueba fundamentada en la comprensión de textos» (PID2020-113731GB-I00), financiado por MCIN/AEI/10.13039/501100011033. Modalidades «Retos Investigación» y Generación de Conocimiento» (sin financiación FEDER). Grupo de Investigación Interdisciplinar: Psicología Edu…										Aleksic, D., Cerne, M., Dysvik, A., Skerlavaj, M., Preference for creativity, perceived clear outcome goals, work enjoyment, and creative performance (2016) European Journal of Work and Organizational Psychology, 25 (3), pp. 363-383. , https://doi.org/10.1080/1359432X.2015.1077809; Argondizzo, C., Creativity and innovation in language education (2012), https://doi.org/10.3726/978-3-0351-0431-8, P…				Oxbridge Publishing House Ltd					11343478				Spanish	Comunicar
45	Decker H., Trang K., Ramirez J., Colley A., Pierce L., Coleman M., Bongiovanni T., Melton G.B., Wick E.	57209102960;58332203100;57200014111;57191967211;57216499789;53986092000;56743184400;7006135479;8274627700;	Large Language Model−Based Chatbot vs Surgeon-Generated Informed Consent Documentation for Common Procedures	2023	JAMA Network Open				E2336997			5	10.1001/jamanetworkopen.2023.36997	https://www.scopus.com/inward/record.uri?eid=2-s2.0-85173350710&doi=10.1001%2fjamanetworkopen.2023.36997&partnerID=40&md5=07667e45648224b0f603db1d85cc4622	Department of Surgery, University of California, San Francisco, United States; Department of Medicine, University of California, San Francisco, United States; Department of Surgery, Institute for Health Informatics, Center for Learning Health System Sciences, University of Minnesota, Minneapolis, United States	Decker, H., Department of Surgery, University of California, San Francisco, United States; Trang, K., Department of Surgery, University of California, San Francisco, United States; Ramirez, J., Department of Surgery, University of California, San Francisco, United States; Colley, A., Department of Surgery, University of California, San Francisco, United States; Pierce, L., Department of Medicine,…	IMPORTANCE Informed consent is a critical component of patient care before invasive procedures, yet it is frequently inadequate. Electronic consent forms have the potential to facilitate patient comprehension if they provide information that is readable, accurate, and complete; it is not known if large language model (LLM)-based chatbots may improve informed consent documentation by generating ac…		cross-sectional study; documentation; human; informed consent; language; surgeon; United States; Cross-Sectional Studies; Documentation; Humans; Informed Consent; Language; Surgeons; United States																						Kinnersley, P., Phillips, K., Savage, K., Interventions to promote informed consent for patients undergoing surgical and other invasive healthcare procedures (2013) Cochrane Database Syst Rev, 7, p. CD009445; Quick Safety 21: Informed Consent: More than Getting a Signature, , https://www.jointcommission.org/resources/news-and-multimedia/newsletters/newsletters/quick-safety/quick-safety-issue-68/,…	Decker, H.; Philip R. Lee Institute for Health Policy Studies, 490 Illinois St, 7th Fl, United States; email: hannah.decker@ucsf.edu			American Medical Association
46	Dergaa I., Chamari K., Zmijewski P., Saad H.B.	57210321130;6602474344;26024518500;57218690236;	From human writing to artificial intelligence generated text: examining the prospects and potential threats of ChatGPT in academic writing	2023	Biology of Sport	40	2		615	622		91	10.5114/BIOLSPORT.2023.125623	https://www.scopus.com/inward/record.uri?eid=2-s2.0-85153204653&doi=10.5114%2fBIOLSPORT.2023.125623&partnerID=40&md5=72f951f36288364372691a144dec3114	Primary Health Care Corporation (PHCC), Doha, Qatar; Research Unit Physical Activity, Sport, and Health, UR18JS01, National Observatory of Sport, Tunis, 1003, Tunisia; High Institute of Sport and Physical Education, University of Sfax, Sfax, Tunisia; Aspetar, Orthopaedic and Sports Medicine Hospital, FIFA Medical Centre of Excellence, Doha, Qatar; Jozef Pilsudski University of Physical Education …	Dergaa, I., Primary Health Care Corporation (PHCC), Doha, Qatar, Research Unit Physical Activity, Sport, and Health, UR18JS01, National Observatory of Sport, Tunis, 1003, Tunisia, High Institute of Sport and Physical Education, University of Sfax, Sfax, Tunisia; Chamari, K., Aspetar, Orthopaedic and Sports Medicine Hospital, FIFA Medical Centre of Excellence, Doha, Qatar; Zmijewski, P., Jozef Pil…	Natural language processing (NLP) has been studied in computing for decades. Recent technological advancements have led to the development of sophisticated artificial intelligence (AI) models, such as Chat Generative Pre-trained Transformer (ChatGPT). These models can perform a range of language tasks and generate human-like responses, which offers exciting prospects for academic efficiency. This…	Artificial Intelligence; Chatbot; Deep Learning; Google Bard; Higher Education; LLaMA; LLM; Machine Learning; Natural Language Processing; NLM; NLP; Paperpal; Peer Review; QuillBot; Rayyan; Research; Sports Medicine							Anecdotally, and intentionally, the authors would like to acknowledge the assistance of ChatGPT in the writing sections (boxes 1 to 3) of our article. The use of ChatGPT within the ethical guidelines showed its potential to support the writing process and improve the clarity and coherence of scientific communication. We are grateful that the high standards of transparency were maintained througho…																Aydın, Ö, Karaarslan, E., OpenAI ChatGPT generated literature review: Digital twin in healthcare (2022) Emerging computer technologies 2, , Aydın Ö, ed. İzmir Akademi Dernegiİzmir Akademi Dernegi, İzmir; van Dis, EAM, Bollen, J, Zuidema, W, van Rooij, R, Bockting, CL., ChatGPT: five priorities for research (2023) Nature, 614 (7947), pp. 224-226; Marti, G., From data to trade: A machine learning a…	Saad, H.B.; University of Sousse, Tunisia; email: helmi.bensaad@rns.tn			Institute of Sport
47	Drori I., Zhang S.J., Shuttleworth R., Zhang S., Tyser K., Chin Z., Lantigua P., Surbehera S., Hunter G., Austin D., Tang L., Hicke Y., Simhon S., Karnik S., Granberry D., Udell M.	55941017400;57687137500;57685852500;58493470100;57997553900;57997470000;58493660200;57997553800;57997298900;57764935900;57353687000;57765375300;58493515400;57750788600;58493515500;55985937900;	From Human Days to Machine Seconds: Automatically Answering and Generating Machine Learning Final Exams	2023	Proceedings of the ACM SIGKDD International Conference on Knowledge Discovery and Data Mining				3947	3955		1	10.1145/3580305.3599827	https://www.scopus.com/inward/record.uri?eid=2-s2.0-85171348783&doi=10.1145%2f3580305.3599827&partnerID=40&md5=81cf215bda0260f61ebc3c94bcbad377	MIT, Columbia University, BU, Cambridge, United States; MIT, Cambridge, United States; Boston University, Boston, United States; Harvard University, Cambridge, United States; Columbia University, New York, United States; Cornell University, Ithaca, United States; Stanford University, Stanford, United States	Drori, I., MIT, Columbia University, BU, Cambridge, United States; Zhang, S.J., MIT, Cambridge, United States; Shuttleworth, R., MIT, Cambridge, United States; Zhang, S., MIT, Cambridge, United States; Tyser, K., Boston University, Boston, United States; Chin, Z., Harvard University, Cambridge, United States; Lantigua, P., MIT, Columbia University, BU, Cambridge, United States; Surbehera, S., Col…	A final exam in machine learning at a top institution such as MIT, Harvard, or Cornell typically takes faculty days to write, and students hours to solve. We demonstrate that large language models pass machine learning finals at a human level on finals available online and automatically generate new human-quality final exam questions in seconds. Previous work has developed program synthesis and f…	few-shot learning; large language models; machine learning; program synthesis; quantitative reasoning	Computational linguistics; Numerical methods; Zero-shot learning; Few-shot learning; Harvard; Human levels; Language model; Large language model; Learning methods; Machine-learning; Problem sets; Program synthesis; Quantitative reasoning; Students																Brown, T.B., Mann, B., Ryder, N., Subbiah, M., Kaplan, J., Dhariwal, P., Neelakantan, A., Askell, A., Language models are few-shot learners (2020) Proceedings of Advances in Neural Information Processing Systems (NeurIPS), 33, pp. 1877-1901; Chen, M., (2021) Evaluating Large Language Models Trained on Code, , 2021 2107. 03374; Chowdhery, A., Narang, S., Devlin, J., Bosma, M., Mishra, G., Roberts,…			ACM SIGKDD;ACM SIGMOD	Association for Computing Machinery	29th ACM SIGKDD Conference on Knowledge Discovery and Data Mining, KDD 2023	6 August 2023 through 10 August 2023		191432		9798400701030			English	Proc. ACM SIGKDD Int. Conf. Knowl. Discov. Data Min.
48	Eager B., Brunton R.	57204148635;58305878000;	Prompting Higher Education Towards AI-Augmented Teaching and Learning Practice	2023	Journal of University Teaching and Learning Practice	20	5					17	10.53761/1.20.5.02	https://www.scopus.com/inward/record.uri?eid=2-s2.0-85161144769&doi=10.53761%2f1.20.5.02&partnerID=40&md5=55fcaa30b25c450388869b2d4ec98325	University of Tasmania, Australia	Eager, B., University of Tasmania, Australia; Brunton, R., University of Tasmania, Australia	Large Language Models (LLMs) and conversational-style generative artificial intelligence (AI) are causing major disruption to higher education pedagogy. The emergence of tools like ChatGPT has raised concerns about plagiarism detection but also presents opportunities for educators to leverage AI to build supportive learning environments. In this commentary, we explore the potential of AI-augmente…	artificial intelligence; assessment design; ChatGPT; large language model; prompt engineering																							Bjork, C., Don’t fret about students using ChatGPT to cheat – AI is a bigger threat to educational equality (2023) The Conversation, , https://theconversation.com/dont-fret-about-students-using-chatgpt-to-cheat-ai-is-a-bigger-threat-to-educational-equality-202842; Cassidy, C., Australian universities to return to ‘pen and paper’ exams after students caught using AI to write essays (2023) The Guar…				University of Wollongong
49	Ekiz O.	57209451812;	Documenting the copyright sphere: Can festivals solve the problem of copyright clearance for documentaries?	2019	Queen Mary Journal of Intellectual Property	9	4		452	470			10.4337//qmjip.2019.04.05	https://www.scopus.com/inward/record.uri?eid=2-s2.0-85078923916&doi=10.4337%2f%2fqmjip.2019.04.05&partnerID=40&md5=5260fd756176d14703489129dc2e25dd	Queen Mary University of London, United Kingdom	Ekiz, O., Queen Mary University of London, United Kingdom	The starting point of this article is a short documentary film that I and five colleagues produced in the course of the Business of Film module at Queen Mary University of London’s Intellectual Property Law LLM Programme. During the process of production, we faced some borderline issues regarding our unauthorized uses of others’ copyright works. When we put ourselves into the copyright’s author’s…	Copyright clearance; Documentary; Documentary film festivals; Freedom of panorama; Limitations and exceptions						Queen Mary University of London, QMUL	This research was conducted while the author was a Masters student at Queen Mary University of London, Intellectual Property Law LLM Programme. The author would like to thank Professor Johanna Gibson for her extensive and valuable comments, his colleagues Francesco Nisi, Louise Perrotte, Lucie Brismontier-Thouny, Rabia Diallo and Vivianna-Paraskevi Paschou, with whom he produced Her Story in the …										Berne Convention for the Protection of Literary and Artistic Works; Case I ZR 102/99, , Reported in [2004] E.C.C. 25; [2003] E.C.D.R. 7; Planning Applications Sub-Committee Report on Trafalgar Square, , http://committees.westminster.gov.uk/Data/Planning%20Applications%20Committee/20120216/Agenda/ITEM%2007-Trafalgar%20Square,%20WC2.PDF, London, WC2 (16 February 2012), at 232, last accessed 18 Marc…	Ekiz, O.; Queen Mary University of LondonUnited Kingdom			Edward Elgar Publishing Ltd.					20459807				English	Queen Mary J. Intellect. Prop.
50	Escalante J., Pack A., Barrett A.	58563333800;57215049333;57215046629;	AI-generated feedback on writing: insights into efficacy and ENL student preference	2023	International Journal of Educational Technology in Higher Education	20	1	57				8	10.1186/s41239-023-00425-2	https://www.scopus.com/inward/record.uri?eid=2-s2.0-85175095013&doi=10.1186%2fs41239-023-00425-2&partnerID=40&md5=0bcf8ccafacec9619ab054c71d32b06f	Faculty of Education and Social Work, Brigham Young University-Hawaii, 55-220 Kulanui Street, Laie, HI 96762, United States; College of Education, Florida State University, Stone Building, 114 West Call Street, Tallahassee, FL 32306, United States	Escalante, J., Faculty of Education and Social Work, Brigham Young University-Hawaii, 55-220 Kulanui Street, Laie, HI 96762, United States; Pack, A., Faculty of Education and Social Work, Brigham Young University-Hawaii, 55-220 Kulanui Street, Laie, HI 96762, United States; Barrett, A., College of Education, Florida State University, Stone Building, 114 West Call Street, Tallahassee, FL 32306, Un…	The question of how generative AI tools, such as large language models and chatbots, can be leveraged ethically and effectively in education is ongoing. Given the critical role that writing plays in learning and assessment within educational institutions, it is of growing importance for educators to make thoughtful and informed decisions as to how and in what capacity generative AI tools should b…	Artificial intelligence; Automated writing evaluation; ChatGPT; Language education							We would like to extend our sincere gratitude to our Research Assistant.										Abd-Elaal, E.-S., Gamage, S., Mills, J., Assisting academics to identify computer generated writing (2022) European Journal of Engineering Education; (2023) Gpt-4: A review on advancements and opportunities in natural language processing, , https://doi.org/10.48550/arXiv.2305.03195, [preprint in arXiv]; Behizadeh, N., Engelhard, G., Jr., Historical view of the influences of measurement and writin…	Escalante, J.; Faculty of Education and Social Work, 55-220 Kulanui Street, United States; email: Juan.escalante@byuh.edu			Springer Science and Business Media Deutschland GmbH					23659440				English	Int. j. educ. technol. high. educ.
51	Fan L., Lafia S., Li L., Yang F., Hemphill L.	57549267200;57190124857;57218382490;58344987800;35772520500;	DataChat: Prototyping a Conversational Agent for Dataset Search and Visualization	2023	Proceedings of the Association for Information Science and Technology	60	1		586	591		1	10.1002/pra2.820	https://www.scopus.com/inward/record.uri?eid=2-s2.0-85174518185&doi=10.1002%2fpra2.820&partnerID=40&md5=f76c4aba8ca96fb51a32be437f0f7799	University of Michigan, United States	Fan, L., University of Michigan, United States; Lafia, S., University of Michigan, United States; Li, L., University of Michigan, United States; Yang, F., University of Michigan, United States; Hemphill, L., University of Michigan, United States	Data users need relevant context and research expertise to effectively search for and identify relevant datasets. Leading data providers, such as the Inter-university Consortium for Political and Social Research (ICPSR), offer standardized metadata and search tools to support data search. Metadata standards emphasize the machine-readability of data and its documentation. There are opportunities t…	data reuse; dataset search; knowledge graphs; large language model; research data management	Computational linguistics; Data visualization; Graph theory; Information management; Information services; Knowledge graph; Search engines; Conversational agents; Data reuse; Dataset search; Knowledge graphs; Language model; Large language model; Learn+; Research data; Research data managements; Reuse; Metadata					National Science Foundation, NSF: 2121789	This material is based upon work supported by the National Science Foundation under grant 2121789.										Auer, S., Kasprzik, A., (2018) Towards a Knowledge Graph for Science, , Gottfried Wilhelm Leibniz Universität Hannover; Brickley, D., Burgess, M., Noy, N., Google Dataset Search: Building a Search Engine for Datasets in an Open Web Ecosystem (2019) The World Wide Web Conference on-WWW, 19, pp. 1365-1375. , San Francisco, CA, USA, ACM Press; Corrall, S., Kennan, M.A., Afzal, W., Bibliometrics and …	Fan, L.; University of MichiganUnited States; email: lizhouf@umich.edu			John Wiley and Sons Inc					23739231				English	Proceedings of the Association for Information Science and Technology
52	Fan Y., Jiang F., Li P., Li H.	57285126700;57203782041;56132447700;8615868400;	GrammarGPT: Exploring Open-Source LLMs for Native Chinese Grammatical Error Correction with Supervised Fine-Tuning	2023	Lecture Notes in Computer Science (including subseries Lecture Notes in Artificial Intelligence and Lecture Notes in Bioinformatics)	14304 LNAI			69	80			10.1007/978-3-031-44699-3_7	https://www.scopus.com/inward/record.uri?eid=2-s2.0-85174517342&doi=10.1007%2f978-3-031-44699-3_7&partnerID=40&md5=3406bdb7e1322e84331846db2af98008	School of Data Science, The Chinese University of Hong Kong, Shenzhen, China; School of Computer Science and Technology, Soochow University, Suzhou, China; Shenzhen Research Institute of Big Data, Guangdong, Shenzhen, China; School of Information Science and Technology, University of Science and Technology of China, Hefei, China	Fan, Y., School of Data Science, The Chinese University of Hong Kong, Shenzhen, China, School of Computer Science and Technology, Soochow University, Suzhou, China, Shenzhen Research Institute of Big Data, Guangdong, Shenzhen, China; Jiang, F., School of Data Science, The Chinese University of Hong Kong, Shenzhen, China, Shenzhen Research Institute of Big Data, Guangdong, Shenzhen, China, School …	Grammatical error correction aims to correct ungrammatical sentences automatically. Recently, some work has demonstrated the excellent capabilities of closed-source Large Language Models (LLMs, e.g., ChatGPT) in grammatical error correction. However, the potential of open-source LLMs remains unexplored. In this paper, we introduced GrammarGPT, an open-source LLM, to preliminary explore its potent…	ChatGPT; Instruction tuning; Large language models; Native Chinese grammatical error correction	Computational linguistics; Heuristic methods; ChatGPT; Closed source; Errors correction; Fine tuning; Grammatical errors; Instruction tuning; Language model; Large language model; Native chinese grammatical error correction; Open-source; Error correction					RF20210005; L221003; 2022450016000429; 2023TSGC0182; 22B520054; 21310102D; 2023MS021; YYJC032022021; Dalian High-Level Talent Innovation Program: 2021RQ056; Inner Mongolia Application Technology Research and Development Funding Project: 2019GG372, 2020PT0002, 2022YFDZ0059; National Natural Science Foundation of China, NSFC: 61936012, 61966025, 61976026, 61977026, 61977029, 62002026, 62006034, 620…	Acknowledgments. This work was supported by Improvement of Innovation Ability of Small and Medium Sci-tech Enterprises Program (No. 2023TSGC0182) and Tai Shan Industry Leading Talent Project.	Acknowledgements. This work was supported by Natural Science Foundation of Guangdong Province (No. 2021A1515011864) and National Natural Science Foundation of China (No. 71472068).	Acknowledgements.. This work was supported in part by the National Natural Science Foundation of China under Grant Grant 62006034; in part by the Natural Science Foundation of Liaoning Province under Grant 2021-BS-067; and in part by the Dalian High-level Talent Innovation Support Plan under Grant 2021RQ056.	Acknowledgement. This work is supported by the National Natural Science Foundation of China (62076008) and the Key Project of Natural Science Foundation of China (61936012).	Acknowledgment. The research work is supported by National Key R&D Program of China (No.202 2YFB3904700), Key Research and Development Program of in Shan-dong Province (2019JZZY020102), Key Research and Development Program of Jiangsu Province (No.BE2018084), Industrial Internet Innovation and Development Project in 2021 (TC210A02M, TC210804D), Opening Project of Beijing Key Laboratory of Mobile C…	Acknowledgment. This work is supported by National Natural Science Foundation of China (Nos. 62066033, 61966025); Inner Mongolia Applied Technology Research and Development Fund Project (Nos. 2019GG372, 2020PT0002, 2022YFDZ0059); Inner Mongolia Natural Science Foundation (2020BS06001). We are grateful for the useful suggestions from the anonymous reviewers.	Acknowledgments. This work was supported in part by Research Funds under National Natural Science Foundation of China (Grant No. 61977026), East China Normal University (Grant No. 2022ECNU-WHCCYJ-29, 2022ECNU-WHCCYJ-31), and Ministry of Education of China (Grant No. YHJC22ZD067).	Acknowledgment. This work was supported by the Guangxi Science and Technology Base and Talent Project (No. 2022AC16002), Horizontal Scientific Research Project of Guangxi Minzu University (No. 2022450016000429).	Acknowledgments. This research was funded by National Natural Science Foundation of China (NSFC) no.62276258, Jiangsu Science and Technology Programme (Natural Science Foundation of Jiangsu Province) no. BE2020006-4, Xi’an Jiaotong-Liverpool University’s Key Program Special Fund no. KSF-E-43.	Fund projects: Key Research Projects of Henan Higher Education Institutions (No.22B520054); Songshan Laboratory Pre-research Project (YYJC032022021); Natural Science Foundation of Zhongyuan University of Technology (2023MS021).	Acknowledgments. This work is partially supported by the General Program of the National Natural Science Foundation of China (Grant No: 61977029) and the China Postdoctoral Science Foundation (Grant No: 2023M731245).	Acknowledgements. This research was supported in part by the National Natural Science Foundation of China(62006062, 62176076), the Guangdong Provincial Key Laboratory of Novel Security Intelligence Technologies(2022B1212010005), Natural Science Foundation of Guangdong(2023A1515012922), and Key Technologies Research and Development Program of Shenzhen JSGG20210802154400001.	Acknowledgments. This work was supported in part by the National Natural Science Foundation of China under Grant No. 62276110, in part by CCF-AFSG Research Fund under Grant No. RF20210005, and in part by the fund of Joint Laboratory of HUST and Pingan Property & Casualty Research (HPL). The authors would also like to thank the anonymous reviewers for their comments on improving the quality of thi…	Supported by the Natural Science Foundation of China (No.61976026), the Fundamental Research Funds for the Central Universities.	Acknowledgement. This work was supported in part by the National Key Research and Development Program under Grant 2020YFB2104200 the National Natural Science Foundation of China under Grant 62261042 and 62002026, the Key Research Projects of the Joint Research Fund for Beijing Natural Science Foundation and the Fengtai Rail Transit Frontier Research Joint Fund under Grant L221003, the Strategic P…	Acknowledgement. This work is supported by the National Natural Science Foundation of China (Grant No. 62271432) and the Guangdong Provincial Key Laboratory of Big Data Computing, The Chinese University of Hong Kong, Shenzhen (Grant No. B10120210117).	Chen, F., Feng, Y., Chain-of-thought prompt distillation for multimodal named entity and multimodal relation extraction (2023) Arxiv Preprint Arxiv, 2306, p. 14122; Chen, Z., (2023) Phoenix: Democratizing Chatgpt across Languages. Arxiv Preprint Arxiv, 2304, p. 10453; Dahlmeier, D., Ng, H.T., Better evaluation for grammatical error correction (2012) Proceedings of the 2012 Conference of the North…	Jiang, F.; School of Data Science, China; email: jeffreyjiang@cuhk.edu.cn	Liu F.Duan N.Xu Q.Hong Y.		Springer Science and Business Media Deutschland GmbH	12th National CCF Conference on Natural Language Processing and Chinese Computing, NLPCC 2023	12 October 2023 through 15 October 2023		302309
53	Farah J.C., Ingram S., Spaenlehauer B., Lasne F.K.-L., Gillet D.	57203636644;58399425500;57702846800;58745319300;57203238151;	Prompting Large Language Models to Power Educational Chatbots	2023	Lecture Notes in Computer Science (including subseries Lecture Notes in Artificial Intelligence and Lecture Notes in Bioinformatics)	14409 LNCS			169	188		1	10.1007/978-981-99-8385-8_14	https://www.scopus.com/inward/record.uri?eid=2-s2.0-85178634464&doi=10.1007%2f978-981-99-8385-8_14&partnerID=40&md5=c5ebf3a14a21ad580ae79b251133c982	École Polytechnique Fédérale de Lausanne (EPFL), Lausanne, Switzerland; University of Applied Sciences (HES-SO), Fribourg, Switzerland	Farah, J.C., École Polytechnique Fédérale de Lausanne (EPFL), Lausanne, Switzerland, University of Applied Sciences (HES-SO), Fribourg, Switzerland; Ingram, S., University of Applied Sciences (HES-SO), Fribourg, Switzerland; Spaenlehauer, B., École Polytechnique Fédérale de Lausanne (EPFL), Lausanne, Switzerland; Lasne, F.K.-L., École Polytechnique Fédérale de Lausanne (EPFL), Lausanne, Switzerla…	The recent rise in both popularity and performance of large language models has garnered considerable interest regarding their applicability to education. Technologies like ChatGPT, which can engage in human-like dialog, have already disrupted educational practices given their ability to answer a wide array of questions. Nevertheless, integrating these technologies into learning contexts faces bo…	Digital Education; Educational Chatbots; GPT-3; Large Language Models; Prompting; Software Engineering Education	Application programs; Computational linguistics; E-learning; Education computing; Engineering education; Students; Chatbots; Digital education; Educational chatbot; GPT-3; Language model; Large language model; Performance; Power; Prompting; Software engineering education; User interfaces																						Airbnb: Airbnb JavaScript Style Guide (2012). https://airbnb.io/javascript/; Bach, S.H., (2022) Promptsource: an Integrated Development Environment and Repository for Natural Language Prompts, , https://doi.org/10.48550/arXiv. 2202.01279; Bergin, J., Fourteen pedagogical patterns (2000) Proceedings of the 5Th European Conference on Pattern Languages of Programs (Euro-Plop, p. 2000. , Devos, M., R…	Farah, J.C.; École Polytechnique Fédérale de Lausanne (EPFL)Switzerland; email: juancarlos.farah@epfl.ch	Xie H.Lai C.-L.Chen W.Xu G.Popescu E.		Springer Science and Business Media Deutschland GmbH	22nd International Conference on Web-based Learning, ICWL 2023	26 November 2023 through 28 November 2023		304739
54	Fecher B., Hebing M., Laufer M., Pohle J., Sofsky F.	56534167100;55961200100;57204729185;57219395617;58482016400;	Friend or foe? Exploring the implications of large language models on the science system	2023	AI and Society							1	10.1007/s00146-023-01791-1	https://www.scopus.com/inward/record.uri?eid=2-s2.0-85174915037&doi=10.1007%2fs00146-023-01791-1&partnerID=40&md5=0ddfb1eb8715bb84a24bf6babf1ceb6a	Alexander von Humboldt Institute for Internet and Society, Berlin, Germany; Wissenschaft im Dialog, Berlin, Germany; DBU Digital Business University of Applied Sciences, Berlin, Germany	Fecher, B., Alexander von Humboldt Institute for Internet and Society, Berlin, Germany, Wissenschaft im Dialog, Berlin, Germany; Hebing, M., Alexander von Humboldt Institute for Internet and Society, Berlin, Germany, DBU Digital Business University of Applied Sciences, Berlin, Germany; Laufer, M., Alexander von Humboldt Institute for Internet and Society, Berlin, Germany; Pohle, J., Alexander von…	The advent of ChatGPT by OpenAI has prompted extensive discourse on its potential implications for science and higher education. While the impact on education has been a primary focus, there is limited empirical research on the effects of large language models (LLMs) and LLM-based chatbots on science and scientific practice. To investigate this further, we conducted a Delphi study involving 72 re…	Delphi study; Large language models; Scholarly communication; Science system	Computational linguistics; Chatbots; DELPHI study; Empirical research; High educations; Language model; Large language model; Model-based OPC; Scholarly communication; Science education; Science systems; Quality assurance						This study was funded and primarily conducted by the Alexander von Humboldt Institute for Internet and Society.																Bazeley, P., Analysing qualitative data: more than ‘identifying themes’ (2009) Malays J Qual Res, 2 (2), pp. 6-22; Beer, D., (2019) Should we use AI to make us quicker and more efficient researchers, , https://blogs.lse.ac.uk/impactofsocialsciences/2019/10/30/should-we-use-ai-to-make-us-quicker-and-more-efficient-researchers/; On the dangers of stochastic parrots: Can language models be too big? …	Fecher, B.; Alexander von Humboldt Institute for Internet and SocietyGermany; email: fecher@hiig.de			Springer Science and Business Media Deutschland GmbH
55	Feehily R.	56747920300;	Problem-based learning and international commercial dispute resolution in the Indian Ocean	2018	Law Teacher	52	1		17	37		1	10.1080/03069400.2016.1273457	https://www.scopus.com/inward/record.uri?eid=2-s2.0-85011298679&doi=10.1080%2f03069400.2016.1273457&partnerID=40&md5=e4c1bf11aee6cf512b584356faf1275f	Middlesex University (Mauritius Branch Campus), Vacoas-Phoenix, Mauritius; Durham University, Durham, DH1 3LE, United Kingdom	Feehily, R., Middlesex University (Mauritius Branch Campus), Vacoas-Phoenix, Mauritius, Durham University, Durham, DH1 3LE, United Kingdom	One of the primary challenges for a law lecturer is to take students beyond their own assumptions about the parameters of a subject and provide them with new opportunities for exploration and a broader vision to enhance learning. A significant feature of law as a discipline of study in higher education that has the potential to impact on the curriculum and the way in which it is taught is the aca…	Dispute resolution; Problem-based learning																	Varnava, T., Webb, J., Key Aspects of Teaching and Learning: Enhancing Learning in Legal Education (2009) A Handbook for Teaching and Learning in Higher Education, p. 363. , H. Fry, S. Ketteridge and S. Marshall,, Abingdon, Routledge; Varnava, T., Webb, J., Key Aspects of Teaching and Learning: Enhancing Learning in Legal Education (2009) A Handbook for Teaching and Learning in Higher Education, …	Feehily, R.; Middlesex University (Mauritius Branch Campus)Mauritius; email: ronan.feehily@mdx.ac.mu			Routledge					3069400				English	Law Teach.
56	Fournier A., Fallet C., Sadeghipour F., Perrottet N.	56317690900;58745256400;56013251100;24336244000;	Assessing the applicability and appropriateness of ChatGPT in answering clinical pharmacy questions [Évaluation de l'applicabilité et de la pertinence de ChatGPT dans la réponse aux questions de pharmacie clinique]	2023	Annales Pharmaceutiques Francaises							1	10.1016/j.pharma.2023.11.001	https://www.scopus.com/inward/record.uri?eid=2-s2.0-85178579298&doi=10.1016%2fj.pharma.2023.11.001&partnerID=40&md5=5ed6429acb1097f26b2da8a7c71882ba	Service of Pharmacy, centre hospitalier universitaire Vaudois (CHUV), Lausanne, Switzerland; School of Pharmaceutical Sciences, University of Geneva, University of Lausanne, Geneva, Switzerland; Center for Research and Innovation in Clinical Pharmaceutical Sciences, Lausanne University Hospital and University of Lausanne, Lausanne, Switzerland	Fournier, A., Service of Pharmacy, centre hospitalier universitaire Vaudois (CHUV), Lausanne, Switzerland; Fallet, C., Service of Pharmacy, centre hospitalier universitaire Vaudois (CHUV), Lausanne, Switzerland; Sadeghipour, F., Service of Pharmacy, centre hospitalier universitaire Vaudois (CHUV), Lausanne, Switzerland, School of Pharmaceutical Sciences, University of Geneva, University of Lausan…	Objectives: Clinical pharmacists rely on different scientific references to ensure appropriate, safe, and cost-effective drug use. Tools based on artificial intelligence (AI) such as ChatGPT (Generative Pre-trained Transformer) could offer valuable support. The objective of this study was to assess ChatGPT's capacity to correctly respond to clinical pharmacy questions asked by healthcare professi…	Artificial intelligence; ChatGPT; Clinical pharmacy; Healthcare professionals’ issues; Large language models																							Miller, R.R., History of clinical pharmacy and clinical pharmacology (1981) J Clin Pharmacol, 21 (4), pp. 195-197; Tanty, A., Dantigny, R., Bardet, J.D., Chanoine, S., Bedouch, P., Allenet, B., French hospital clinical pharmacy: an identity crisis? (2021) Ann Pharm Fr, 79 (4), pp. 431-439; Baudouin, A., Herledan, C., Poletto, N., Guillemin, M.D., Maison, O., Garreau, R., Economic impact of clinic…	Perrottet, N.; Service of Pharmacy, Switzerland; email: Nancy.Perrottet@chuv.ch			Elsevier Masson s.r.l.
57	Fowler T., Pullen S., Birkett L.	58484005700;58484141500;57756588600;	Performance of ChatGPT and Bard on the official part 1 FRCOphth practice questions	2023	British Journal of Ophthalmology			bjo-2023-324091				2	10.1136/bjo-2023-324091	https://www.scopus.com/inward/record.uri?eid=2-s2.0-85177487906&doi=10.1136%2fbjo-2023-324091&partnerID=40&md5=fc1f70d6786977b39ae6e954ffebb4a5	Department of Medicine, Barking Havering and Redbridge University Hospitals NHS Trust, London, United Kingdom; Department of Anaesthetics, Princess Alexandra Hospital, Harlow, United Kingdom; Emergency Medicine, Royal Free Hospital, London, United Kingdom	Fowler, T., Department of Medicine, Barking Havering and Redbridge University Hospitals NHS Trust, London, United Kingdom; Pullen, S., Department of Anaesthetics, Princess Alexandra Hospital, Harlow, United Kingdom; Birkett, L., Emergency Medicine, Royal Free Hospital, London, United Kingdom	Background: Chat Generative Pre-trained Transformer (ChatGPT), a large language model by OpenAI, and Bard, Google's artificial intelligence (AI) chatbot, have been evaluated in various contexts. This study aims to assess these models' proficiency in the part 1 Fellowship of the Royal College of Ophthalmologists (FRCOphth) Multiple Choice Question (MCQ) examination, highlighting their potential in…	Medical Education																							Krizhevsky, A., Sutskever, I., Hinton, G.E., Imagenet classification with deep Convolutional neural networks (2012) Advances in Neural Information Processing Systems, pp. 1097-1105; De Fauw, J., Ledsam, J.R., Romera-Paredes, B., Clinically applicable deep learning for diagnosis and referral in retinal disease (2018) Nat Med, 24, pp. 1342-1350. , http://dx.doi.org/10.1038/s41591-018-0107-6; Vaswan…	Fowler, T.; Barking Havering and Redbridge University Hospitals NHS TrustUnited Kingdom; email: thomas.fowler6@nhs.net			BMJ Publishing Group
58	French F., Levi D., Maczo C., Simonaityte A., Triantafyllidis S., Varda G.	56369297600;58553580400;58553580500;58553039200;58553580600;58554120600;	Creative Use of OpenAI in Education: Case Studies from Game Development	2023	Multimodal Technologies and Interaction	7	8	81				1	10.3390/mti7080081	https://www.scopus.com/inward/record.uri?eid=2-s2.0-85169072019&doi=10.3390%2fmti7080081&partnerID=40&md5=43b7dfea735ded9fc172468e7770a3cb	School of Computing and Digital Media, London Metropolitan University, London, N7 8DB, United Kingdom	French, F., School of Computing and Digital Media, London Metropolitan University, London, N7 8DB, United Kingdom; Levi, D., School of Computing and Digital Media, London Metropolitan University, London, N7 8DB, United Kingdom; Maczo, C., School of Computing and Digital Media, London Metropolitan University, London, N7 8DB, United Kingdom; Simonaityte, A., School of Computing and Digital Media, L…	Educators and students have shown significant interest in the potential for generative artificial intelligence (AI) technologies to support student learning outcomes, for example, by offering personalized experiences, 24 h conversational assistance, text editing and help with problem-solving. We review contemporary perspectives on the value of AI as a tool in an educational context and describe o…	artificial intelligence; ChatGPT; Dall-E; education; game design; game programming; interaction design; LLM; OpenAI; procedural generation																	Crawford, J., Cowling, M., Allen, K.-A., Leadership is needed for ethical ChatGPT: Character, assessment, and learning using artificial intelligence (AI) (2023) J. Univ. Teach. Learn. Pract, 20, p. 2; Yu, H., Reflection on whether Chat GPT should be banned by academia from the perspective of education and teaching (2023) Front. Psychol, 14, p. 1181712. , https://www.frontiersin.org/articles/10.33…	French, F.; School of Computing and Digital Media, United Kingdom; email: f.french@londonmet.ac.uk			Multidisciplinary Digital Publishing Institute (MDPI)					24144088				English	Multimodal Tech. Inter.
59	Fu R., Yang X.	57292311000;57291854500;	Analysis of AIGC Language Models and Application Scenarios in University Libraries [AIGC 语言模型分析及其高校图书馆应用场景研究]	2023	Journal of Library and Information Science in Agriculture	35	7		27	38			10.13998/j.cnki.issn1002-1248.23-0406	https://www.scopus.com/inward/record.uri?eid=2-s2.0-85183019798&doi=10.13998%2fj.cnki.issn1002-1248.23-0406&partnerID=40&md5=cf4d95c1341c2b9d4afe230403143b47	Guangxi Normal University Library, Guilin, 541004, China; College of Life Sciences, Guangxi Normal University, Guilin, 541004, China	Fu, R., Guangxi Normal University Library, Guilin, 541004, China; Yang, X., College of Life Sciences, Guangxi Normal University, Guilin, 541004, China	[Purpose/Significance] Artificial intelligence generated content (AIGC)'s content creation method has brought about a new revolution to the field of library and information science (LIS). Currently, the related research is mainly based on AIGC and ChatGPT, while ERNIE bot and Bard are less studied. Comparative analysis of the advantages and disadvantages of the AIGC large language models, discuss…	AIGC; Bard; ChatGPT; ERNIE bot; smart library																							https://baike.baidu.com/item/ChatGPT, 百度百科. ChatGPT[EB/OL].[2023-03-23]. Baidu Baike. ChatGPT [EB/OL].[2023-03-23]. https://baike.baidu.com/item/ChatGPT; Baidu, Baike, ERNIE bot https://baike.baidu.com/item/文心一言, 百度百科. 文心一言[EB/OL].[2023-03-23]. [EB/OL]. [2023-03 23]. https://baike.baidu.com/item/文心一言; Baidu, Baike, Bard https://baike.baidu.com/item/Bard/62648598, 百度百科. Bard[EB/OL]. [2023-03-23]. …				Agricultural Information Institute, Chinese Academy of Agricultural Sciences
60	Galat D., Rizoiu M.-A.	57232262900;53864218100;	Enhancing Biomedical Text Summarization and Question-Answering: On the Utility of Domain-Specific Pre-Training University of Technology Sydney participation in BioASQ Task 11b Phase B	2023	CEUR Workshop Proceedings	3497			102	113				https://www.scopus.com/inward/record.uri?eid=2-s2.0-85175638168&partnerID=40&md5=bc08dac7b28eb9b20c7e60593fe27ab7	University of Technology Sydney (UTS), Australia	Galat, D., University of Technology Sydney (UTS), Australia; Rizoiu, M.-A., University of Technology Sydney (UTS), Australia	Biomedical summarization requires large datasets to train for text generation. We show that while transfer learning offers a viable option for addressing this challenge, an in-domain pre-training does not always offer advantages in a BioASQ summarization task. We identify a suitable model architecture and use it to show a benefit of a general-domain pre-training followed by a task-specific fine-t…	BioASQ; biomedical question answering; biomedical summarization; CEUR-WS; domain-specific pre-training; language modeling; natural language processing; transfer learning	Computational linguistics; Modeling languages; Natural language processing systems; Transfer learning; BioASQ; Biomedical question answering; Biomedical summarization; CEUR-WS; Domain specific; Domain-specific pre-training; Language model; Language processing; Natural language processing; Natural languages; Pre-training; Transfer learning; Large dataset																						Krumholz, H. M., Terry, S. F., Waldstreicher, J., (2016) Data acquisition, curation, and use for a continuously learning health system; Bommasani, R., Hudson, D. A., Adeli, E., Altman, R., Arora, S., von Arx, S., Bernstein, M. S., Liang, P., (2021) On the opportunities and risks of foundation models; Vaswani, A., Shazeer, N., Parmar, N., Uszkoreit, J., Jones, L., Gomez, A. N., Kaiser, Łukasz, Pol…		Aliannejadi M.Faggioli G.Ferro N.Vlachos M.		CEUR-WS	24th Working Notes of the Conference and Labs of the Evaluation Forum, CLEF-WN 2023	18 September 2023 through 21 September 2023		193170
61	García-Díaz J.A., Miñarro-Giménez J.A., Almela Á., Alcaraz-Mármol G., Marín-Pérez M.J., García-Sánchez F., Valencia-García R.	57201498591;26422426900;54384764800;56348004100;58652491800;7102142588;55887649000;	AIInFunds. Intelligent Services for Monitoring Tendencies of Alternative Investment Funds	2023	CEUR Workshop Proceedings	3516			55	59				https://www.scopus.com/inward/record.uri?eid=2-s2.0-85176458254&partnerID=40&md5=0c33921a1394e24cedd0ee7e3d7f357d	Facultad de Informática, Universidad de Murcia, Campus de Espinardo, Murcia, 30100, Spain; Facultad de Letras, Universidad de Murcia, Campus de la Merced, Murcia, 30001, Spain; Departamento de Filología Moderna, Universidad de Castilla la Mancha45071, Spain	García-Díaz, J.A., Facultad de Informática, Universidad de Murcia, Campus de Espinardo, Murcia, 30100, Spain; Miñarro-Giménez, J.A., Facultad de Informática, Universidad de Murcia, Campus de Espinardo, Murcia, 30100, Spain; Almela, Á., Facultad de Letras, Universidad de Murcia, Campus de la Merced, Murcia, 30001, Spain; Alcaraz-Mármol, G., Departamento de Filología Moderna, Universidad de Castill…	Alternative investment funds have high strategic value but high uncertainty associated with them because they are relatively new and difficult to monitor using traditional approaches. In addition, being such specialized products there is little public information. The main objective of the AIInFunds project is to use Natural Language Processing and Semantic Web technologies to extract information…	Emotion Analysis; Large Language Models; Natural Language Processing; Semantic Web; Sentiment Analysis	Behavioral research; Sentiment analysis; Emotion analysis; Intelligent Services; Investment funds; Language model; Language processing; Large language model; Natural language processing; Natural languages; Semantic-Web; Sentiment analysis; Semantic Web						Alternative investment funds have high strategic value but high uncertainty associated with them because they are relatively new and difficult to monitor using traditional approaches. In addition, being such specialized products there is little public information. The main objective of the AIInFunds project is to use Natural Language Processing and Semantic Web technologies to extract information…	This project is funded by the Prueba de Concepto 2021 call1 and is based on a previous project KBS4FIA [1], whose objective was the development of Natural Language Processing and knowledge extraction technologies within the financial domain to enable a better management of unstructured information for decision-making within this domain. Knowledge extraction technologies based on Spanish texts wer…															García-Sánchez, F., Paredes-Valverde, M. A., Valencia-García, R., Alcaraz-Mármol, G., Almela, Á., KBS4FIA: leveraging advanced knowledge-based systems for financial information analysis (2017) Procesamiento del Lenguaje Natural, 59, pp. 145-148. , http://journal.sepln.org/sepln/ojs/ojs/index.php/pln/article/view/5507; (2022) Analistas Financieros Internacionales, Inversión en activos alternativos…	García-Díaz, J.A.; Facultad de Informática, Spain; email: joseantonio.garcia8@um.es	Camara E.M.Raez A.M.Valdivia M.T.M.Lopez L.A.U.	Diputacion de Jaen;Escuela Politecnica Superior de Jaen (EPS);et al.;Impulso de las Lenguas en la Inteligencia Artificial (ILENIA);Junta de Andalucia, Consejeria de Turismo, Cultura y Deporte;PERTE Nueva Economia de la Lengua	CEUR-WS	2023 Annual Conference of the Spanish Association for Natural Language Processing: Projects and System Demonstrations, SEPLN-PD 2023	27 September 2023 through 29 September 2023		193703
62	Garcia-Pi B., Chaudhury R., Versaw M., Back J., Kwon D., Kicklighter C., Taele P., Seo J.H.	58629453300;57207115437;58629245100;58629245200;58629453400;57210696177;25926107700;55149233500;	AllyChat: Developing a VR Conversational AI Agent Using Few-Shot Learning to Support Individuals with Intellectual Disabilities	2023	Lecture Notes in Computer Science (including subseries Lecture Notes in Artificial Intelligence and Lecture Notes in Bioinformatics)	14145 LNCS			402	407			10.1007/978-3-031-42293-5_43	https://www.scopus.com/inward/record.uri?eid=2-s2.0-85173057826&doi=10.1007%2f978-3-031-42293-5_43&partnerID=40&md5=00b0567b8707b004a824c8a976d57461	Texas A&M University, College Station, TX 77840, United States	Garcia-Pi, B., Texas A&M University, College Station, TX 77840, United States; Chaudhury, R., Texas A&M University, College Station, TX 77840, United States; Versaw, M., Texas A&M University, College Station, TX 77840, United States; Back, J., Texas A&M University, College Station, TX 77840, United States; Kwon, D., Texas A&M University, College Station, TX 77840, United States; Kicklighter, C., …	Virtual Reality (VR) environments have been used for training, education, and entertainment due to the interactive and embodied experiences the technology provides. Studies have shown that VR can be used to help support individuals with intellectual disabilities in various aspects of their lives. Likewise, conversational agents such as chatbots can be used to bolster competence training and well-…	Intellectual Disabilities; Large Language Model; Virtual Reality Job Interview	Chatbots; Conversational agents; Embodied experience; Intellectual disability; Job interviews; Language model; Large language model; Virtual reality job interview; Virtual-reality environment; Well being; Virtual reality																						Erolin, C., Reid, L., McDougall, S., Using virtual reality to complement and enhance anatomy education (2019) J. Vis. Commun. Med., 42 (3), pp. 93-101. , https://doi.org/10.1080/17453054. 2019.1597626; Yee, N., Bailenson, J.N., Rickertsen, K., A meta-analysis of the impact of the inclusion and realism of human-like faces on user experiences in interfaces (2007) Conference Human Factors Computer S…	Garcia-Pi, B.; Texas A&M UniversityUnited States; email: brinni@tamu.edu	Abdelnour Nocera J.Kristin Larusdottir M.Petrie H.Piccinno A.Winckler M.		Springer Science and Business Media Deutschland GmbH	19th IFIP TC 13 International Conference on Human-Computer Interaction, INTERACT 2023	28 August 2023 through 1 September 2023		299839
63	Gay M., Chesi C.	58789562700;55570075100;	Extracting an expectation-based lexicon for UD treebanks	2023	CEUR Workshop Proceedings	3596								https://www.scopus.com/inward/record.uri?eid=2-s2.0-85181173161&partnerID=40&md5=c15c590bb3eda41ed7731fcdfa677c08	IUSS, P.zza Vittoria 15, Pavia, 27100, Italy	Gay, M., IUSS, P.zza Vittoria 15, Pavia, 27100, Italy; Chesi, C., IUSS, P.zza Vittoria 15, Pavia, 27100, Italy	In this paper, we present a refinement of the deterministic lexicon extraction algorithm discussed in [1]. This new version is able to infer categorial expectations from any University Dependency (UD) treebank [2] and recast non-trivial backward dependencies in terms of movement operations [3, 4]. The improvements with respect to a preliminary version of the algorithm are related to a more granul…	lexical; lexicon; minimalist grammars; parsing; structural ambiguity; universal dependencies	Deterministics; Extraction algorithms; Lexical; Lexicon; Minimalist grammar; Non-trivial; Parsing; Structural ambiguity; Treebanks; Universal dependency; Computational linguistics					Ministero dell’Istruzione, dell’Università e della Ricerca, MIUR: 202223PL4N, PRO3 2021-2023	This project is partially founded by BEXT (New Behavioral EXperimental approaches to complexity perception and stress assessment in linguistic and cognitive research) MIUR PRO3 2021-2023 and TGRA2L (Testing GRAdeness and GRAmmaticality in Linguistics) PRIN 2022 (code: 202223PL4N) Projects.																Chesi, C., Parameters of cross-linguistic variation in expectation-based Minimalist Grammars (e-MGs) (2023) IJCoL, 9, p. 21; Nivre, J., Agić, Ž., Ahrenberg, L., Antonsen, L., Aranzabe, M.J., Asahara, M., Ateyah, L., Augustinus, L., (2017) Universal Dependencies, 2, p. 1. , others; Stabler, E., Two Models of Minimalist, Incremental Syntactic Analysis (2013) Top Cogn Sci, 5, pp. 611-633. , https://…	Gay, M.; IUSS, P.zza Vittoria 15, Italy; email: matteo.gay@iusspavia.it	Boschetti F.Boschetti F.Lebani G.E.Magnini B.Novielli N.		CEUR-WS	9th Italian Conference on Computational Linguistics, CLiC-it 2023	30 November 2023 through 2 December 2023		195716
64	Giannakopoulos K., Kavadella A., Salim A.A., Stamatopoulos V., Kaklamanos E.G.	58175285700;14037472600;58817603300;57453693400;6603502952;	Evaluation of the Performance of Generative AI Large Language Models ChatGPT, Google Bard, and Microsoft Bing Chat in Supporting Evidence-Based Dentistry: Comparative Mixed Methods Study	2023	Journal of Medical Internet Research	25	1	e51580				1	10.2196/51580	https://www.scopus.com/inward/record.uri?eid=2-s2.0-85181396069&doi=10.2196%2f51580&partnerID=40&md5=75055e76438ae649744ae2f15ccbf56c	School of Dentistry, European University Cyprus, Nicosia, Cyprus; Information Management Systems Institute, ATHENA Research and Innovation Center, Athens, Greece; School of Dentistry, Aristotle University of Thessaloniki, Thessaloniki, Greece; Mohammed Bin Rashid University of Medicine and Health Sciences, Dubai, United Arab Emirates	Giannakopoulos, K., School of Dentistry, European University Cyprus, Nicosia, Cyprus; Kavadella, A., School of Dentistry, European University Cyprus, Nicosia, Cyprus; Salim, A.A., School of Dentistry, European University Cyprus, Nicosia, Cyprus; Stamatopoulos, V., Information Management Systems Institute, ATHENA Research and Innovation Center, Athens, Greece; Kaklamanos, E.G., School of Dentistry…	Background: The increasing application of generative artificial intelligence large language models (LLMs) in various fields, including dentistry, raises questions about their accuracy. Objective: This study aims to comparatively evaluate the answers provided by 4 LLMs, namely Bard (Google LLC), ChatGPT-3.5 and ChatGPT-4 (OpenAI), and Bing Chat (Microsoft Corp), to clinically relevant questions fr…	AI; artificial intelligence; ChatGPT; clinical decision-making; clinical practice; clinical practice guidelines; dental practice; dental professional; evidence-based dentistry; generative pretrained transformers; Google Bard; large language models; Microsoft Bing	Article; artificial intelligence chatbot; ChatGPT; clinical decision making; consensus; controlled study; evidence based dentistry; google bard; human; language; microsoft bing chat; practice guideline; qualitative analysis; quality control; artificial intelligence; dentist; evidence based dentistry; professional standard; search engine; Artificial Intelligence; Dentists; Evidence-Based Dentistry…						This study was funded by the authors and the European University Cyprus and received no specific grant from any funding agency in the public, commercial, or not-for-profit sector. The authors declare that generative artificial intelligence was not used in the writing of any portion the manuscript.																Schwendicke, F, Blatz, M, Uribe, S, Cheung, W, Verma, M, Linton, J, Artificial intelligence for dentistry, FDI artificial intelligence working group (2023) FDI, , https://www.fdiworlddental.org/sites/default/files/2023-01/FDI%20ARTIFICIAL%20INTELLIGENCE%20WORKING%20GROUP%20WHITE%20PAPER_0.pdf, [accessed 2023-11-29]; Seah, J., ChatGPT and the future of dentistry https://dentalresourceasia.com/chat…	Giannakopoulos, K.; School of Dentistry, 6 Diogenis St, Engomi, Cyprus; email: k.giannakopoulos@euc.ac.cy			JMIR Publications Inc.
65	Giannos P., Delardas O.	57221354507;57605882200;	Performance of ChatGPT on UK Standardized Admission Tests: Insights from the BMAT, TMUA, LNAT, and TSA Examinations	2023	JMIR Medical Education	9		e47737				34	10.2196/47737	https://www.scopus.com/inward/record.uri?eid=2-s2.0-85159892886&doi=10.2196%2f47737&partnerID=40&md5=c69e63c61b6cedbf6186300968dbab78	Department of Life Sciences, Faculty of Natural Sciences, Imperial College London, London, United Kingdom; Promotion of Emerging and Evaluative Research Society, London, United Kingdom	Giannos, P., Department of Life Sciences, Faculty of Natural Sciences, Imperial College London, London, United Kingdom, Promotion of Emerging and Evaluative Research Society, London, United Kingdom; Delardas, O., Promotion of Emerging and Evaluative Research Society, London, United Kingdom	Background: Large language models, such as ChatGPT by OpenAI, have demonstrated potential in various applications, including medical education. Previous studies have assessed ChatGPT’s performance in university or professional settings. However, the model’s potential in the context of standardized admission tests remains unexplored. Objective: This study evaluated ChatGPT’s performance on standar…	BMAT; ChatGPT; GPT; law; LNAT; medical education; medicine; natural language processing; standardized admissions tests; TMUA; TSA																							Khurana, D, Koli, A, Khatter, K, Singh, S., Natural language processing: state of the art, current trends and challenges (2023) Multimed Tools Appl, 82 (3), pp. 3713-3744. , [FREE Full _text] [doi] [Medline: 35855771]; Smith, K., Microsoft teams up with OpenAI to exclusively license GPT-3 language model, , https://blogs.microsoft.com/blog/2020/09/22/microsoft-teams-up-with-openai-to-exclusively-l…	Giannos, P.; Department of Life Sciences, South Kensington, United Kingdom; email: panagiotis.giannos19@imperial.ac.uk			JMIR Publications Inc.
66	Guo Y.	35205046400;	AI-Fused Automation [From the Editor's Desk]	2023	IEEE Robotics and Automation Magazine	30	2		4				10.1109/MRA.2023.3266616	https://www.scopus.com/inward/record.uri?eid=2-s2.0-85162836523&doi=10.1109%2fMRA.2023.3266616&partnerID=40&md5=56161d58d78fbee49583229896039334	Stevens Institute of Technology, United States	Guo, Y., Stevens Institute of Technology, United States	ChatGPT is everywhere. From the weekend party table to the weekday university seminars, people have been talking about ChatGPT. Since its public launch at the end of last November, it reached 100 million users in January and has become the fastest-growing Internet service ever. GPT is short for generative pretrained transformer, and the chatbot is the large language model pretrained with text dat…		Chatbots; Industrial sector; Intelligent machine; Internet-services; Language model; Text database																(2023) Where are all the robots?, pp. 51-53. , https://www.economist.com/business/2023/03/06/dont-fear-an-ai-induced-jobs-apocalypse-just-yet, Mar. 11th-17th; Hutchinson, S., Robotics and automation [President's Message] (2021) IEEE Robot. Autom. Mag., 28 (2), pp. 6-8. , Jun	Guo, Y.; Stevens Institute of TechnologyUnited States; email: yguo1@stevens.edu			Institute of Electrical and Electronics Engineers Inc.					10709932		IRAME		English	IEEE Rob Autom Mag
67	Guo Y., Lee D.	57219006300;58205101600;	Leveraging ChatGPT for Enhancing Critical Thinking Skills	2023	Journal of Chemical Education	100	12		4876	4883		3	10.1021/acs.jchemed.3c00505	https://www.scopus.com/inward/record.uri?eid=2-s2.0-85178639069&doi=10.1021%2facs.jchemed.3c00505&partnerID=40&md5=6a6a15dcb2d098adb4a33ab344677afb	Department of Chemistry, School of Science and Technology, Georgia Gwinnett College, 1000 University Center Lane, Lawrenceville, GA 30043, United States; STEM Academy, George Walton Comprehensive High School, 1590 Bill Murdock Road, Marietta, GA 30062, United States	Guo, Y., Department of Chemistry, School of Science and Technology, Georgia Gwinnett College, 1000 University Center Lane, Lawrenceville, GA 30043, United States; Lee, D., STEM Academy, George Walton Comprehensive High School, 1590 Bill Murdock Road, Marietta, GA 30062, United States	This article presents a study conducted at Georgia Gwinnett College (GGC) to explore the use of ChatGPT, a large language model, for fostering critical thinking skills in higher education. The study implemented a ChatGPT-based activity in introductory chemistry courses, where students engaged with ChatGPT in three stages: account setup and orientation, essay creation, and output revision and vali…	Computer-Based Learning; Curriculum; First-Year Undergraduate/General; General Public; Interdisciplinary/Multidisciplinary; Internet/Web-Based Learning; Student-Centered Learning																	Paul, R.W., Critical thinking: fundamental to education for a free society (1984) Educational Leadership, 42 (1), pp. 4-14; Facione, P.A., Critical thinking: what it is and why it counts (2011) Insight Assessment, 1 (1), pp. 1-23; Davies, M., A model of critical thinking in higher education (2015) Higher Education: Handbook of Theory and Research, 30, pp. 41-92; Halpern, D.F., Teaching for critic…	Guo, Y.; Department of Chemistry, 1000 University Center Lane, United States; email: yguo1@ggc.edu			American Chemical Society					219584		JCEDA		English	J Chem Educ
68	Hackl V., Müller A.E., Granitzer M., Sailer M.	58308327400;58603963400;8714519100;57210924628;	Is GPT-4 a reliable rater? Evaluating consistency in GPT-4's text ratings	2023	Frontiers in Education	8		1272229					10.3389/feduc.2023.1272229	https://www.scopus.com/inward/record.uri?eid=2-s2.0-85180183813&doi=10.3389%2ffeduc.2023.1272229&partnerID=40&md5=c2f86985e19ddef0a449cd3b1799e889	Faculty of Social and Educational Sciences, University of Passau, Passau, Germany; Faculty of Law, University of Passau, Passau, Germany; Faculty of Computer Science and Mathematics, University of Passau, Passau, Germany	Hackl, V., Faculty of Social and Educational Sciences, University of Passau, Passau, Germany; Müller, A.E., Faculty of Law, University of Passau, Passau, Germany; Granitzer, M., Faculty of Computer Science and Mathematics, University of Passau, Passau, Germany; Sailer, M., Faculty of Social and Educational Sciences, University of Passau, Passau, Germany	This study reports the Intraclass Correlation Coefficients of feedback ratings produced by OpenAI's GPT-4, a large language model (LLM), across various iterations, time frames, and stylistic variations. The model was used to rate responses to tasks related to macroeconomics in higher education (HE), based on their content and style. Statistical analysis was performed to determine the absolute agr…	artificial intelligence; feedback; GPT-4; higher education; large language model; prompt engineering						Bundesministerium für Bildung und Forschung, BMBF: 16DHBKI059	The author(s) declare financial support was received for the research, authorship, and/or publication of this article. The report has been funded by the German Federal Ministry of Education and Research (BMBF) under the project DeepWrite (Grant No. 16DHBKI059). The authors are responsible for the content of this publication.																Bursztyn, V., Demeter, D., Downey, D., Birnbaum, L., “Learning to perform complex tasks through compositional fine-tuning of language models,” (2022) Findings of the Association for Computational Linguistics: EMNLP 2022, pp. 1676-1686. , Abu Dhabi, Association for Computational Linguistics; Cao, Y., Li, S., Liu, Y., Yan, Z., Dai, Y., Yu, P.S., A comprehensive survey of AI-generated content (AIGC)…	Hackl, V.; Faculty of Social and Educational Sciences, Germany; email: veronika.hackl@uni-passau.de			Frontiers Media SA
69	Hammond K.M., Lucas P., Hassouna A., Brown S.	57072809800;7202397186;16202436700;55712937000;	A Wolf in Sheep’s Clothing? Critical Discourse Analysis of Five Online Automated Paraphrasing Sites	2023	Journal of University Teaching and Learning Practice	20	7	8					10.53761/1.20.7.08	https://www.scopus.com/inward/record.uri?eid=2-s2.0-85176796676&doi=10.53761%2f1.20.7.08&partnerID=40&md5=d54594d0c8bfcf22823ba8e8fbd70036	Auckland University of Technology, New Zealand	Hammond, K.M., Auckland University of Technology, New Zealand; Lucas, P., Auckland University of Technology, New Zealand; Hassouna, A., Auckland University of Technology, New Zealand; Brown, S., Auckland University of Technology, New Zealand	Research on academic integrity used to focus more on student character and behaviour. Now this research includes wider viewing of this issue as a current teaching and learning challenge which requires pedagogical intervention. It is now the responsibility of staff and institutions to treat the creation of a learning environment supporting academic integrity as a teaching and learning priority. Pl…	academic integrity; Automated paraphrasing tools; critical discourse analysis; generative AI; higher education																							Bailey, J., A brief history of article spinning (2018), https://www.plagiarismtoday.com/2018/03/08/a-brief-history-of-article-spinning/, (March 8). Plagiarism Today; Braun, V., Clarke, V., Using thematic analysis in psychology (2006) Qualitative Research in Psychology, 3, pp. 77-101. , https://doi.org/10.1191/1478088706qp063oa; Braun, V., Clarke, V., (2013) Successful qualitative research: A prac…				University of Wollongong
70	Hashimoto D.A., Johnson K.B.	55029426400;8744561900;	The Use of Artificial Intelligence Tools to Prepare Medical School Applications	2023	Academic Medicine	98	9		978	982		2	10.1097/ACM.0000000000005309	https://www.scopus.com/inward/record.uri?eid=2-s2.0-85168382233&doi=10.1097%2fACM.0000000000005309&partnerID=40&md5=fcab68072a980f2c6d32f36c6d0784f4	General Robotics, Automation, Sensing, and Perception Laboratory, University of Pennsylvania, Philadelphia, PA, United States; Pediatrics Biomedical Informatics and Science Communication, University of Pennsylvania, Philadelphia, PA, United States	Hashimoto, D.A., General Robotics, Automation, Sensing, and Perception Laboratory, University of Pennsylvania, Philadelphia, PA, United States; Johnson, K.B., Pediatrics Biomedical Informatics and Science Communication, University of Pennsylvania, Philadelphia, PA, United States	Advances in artificial intelligence (AI) have been changing the landscape in daily life and the practice of medicine. As these tools have evolved to become consumer-friendly, AI has become more accessible to many individuals, including applicants to medical school. With the rise of AI models capable of generating complex passages of text, questions have arisen regarding the appropriateness of usi…		artificial intelligence; curriculum; human; medical education; medical school; university; Artificial Intelligence; Curriculum; Education, Medical; Faculty; Humans; Schools, Medical																2022 FACTS: Applicants and Matriculants Data., , https://www.aamc.org/data-reports/students-residents/data/2022-facts-applicants-and-matriculants-data, Association of American Medical Colleges. Accessed June 16, 2023; U.S. Medical School Total Applicants, 2002-2017. 2017 Applicant and Matriculant Data Tables, , https://www.aamc.org/system/files/d/1/5-2017_applicant_and_matriculant_data_tables.pdf…	Hashimoto, D.A.3400 Spruce St., 4 Silverstein Pavilion, United States; email: daniel.hashimoto@pennmedicine.upenn.edu			Wolters Kluwer Health					10402446		ACMEE	37369073	English	Acad. Med.
71	Hirosawa T., Kawamura R., Harada Y., Mizuta K., Tokumasu K., Kaji Y., Suzuki T., Shimizu T.	57193420373;57222005090;57189847899;58605122100;57214117313;57413892100;57226872394;36141977800;	ChatGPT-Generated Differential Diagnosis Lists for Complex Case–Derived Clinical Vignettes: Diagnostic Accuracy Evaluation	2023	JMIR Medical Informatics	11		e48808				7	10.2196/48808	https://www.scopus.com/inward/record.uri?eid=2-s2.0-85176744232&doi=10.2196%2f48808&partnerID=40&md5=c3d88ebac18cca438b087564083c5c1a	Department of Diagnostic and Generalist Medicine, Dokkyo Medical University, Tochigi, Japan; Department of General Medicine, Okayama University Graduate School of Medicine, Dentistry and Pharmaceutical Sciences, Okayama, Japan; Department of General Medicine, International University of Health, Welfare Narita Hospital, Chiba, Japan; Department of Hospital Medicine, Urasoe General Hospital, Okinaw…	Hirosawa, T., Department of Diagnostic and Generalist Medicine, Dokkyo Medical University, Tochigi, Japan; Kawamura, R., Department of Diagnostic and Generalist Medicine, Dokkyo Medical University, Tochigi, Japan; Harada, Y., Department of Diagnostic and Generalist Medicine, Dokkyo Medical University, Tochigi, Japan; Mizuta, K., Department of Diagnostic and Generalist Medicine, Dokkyo Medical Uni…	Background: The diagnostic accuracy of differential diagnoses generated by artificial intelligence chatbots, including ChatGPT models, for complex clinical vignettes derived from general internal medicine (GIM) department case reports is unknown. Objective: This study aims to evaluate the accuracy of the differential diagnosis lists generated by both third-generation ChatGPT (ChatGPT-3.5) and fou…	accuracy; AI chatbot; artificial intelligence; case study; ChatGPT; clinical decision support; decision support; diagnosis; diagnostic; diagnostic excellence; language model; large language models; natural language processing; vignette																							Holmboe, E, Durning, S., Assessing clinical reasoning: moving from in vitro to in vivo (2014) Diagnosis (Berl), 1 (1), pp. 111-117. , Jan 01; [FREE Full text] [doi] [Medline: 29539977]; Harada, Y, Otaka, Y, Katsukura, S, Shimizu, T., Effect of contextual factors on the prevalence of diagnostic errors among patients managed by physicians of the same specialty: a single-centre retrospective observa…	Hirosawa, T.; Department of Diagnostic and Generalist Medicine Dokkyo Medical University, 880 Kitakobayashi, Mibu-cho Shimotsuga, Japan; email: hirosawa@dokkyomed.ac.jp			JMIR Publications Inc.
72	Holland B.J.	57885164700;	ChatGPT 3.5 and 4: Its Ramifications on Librarianship, Academia, Education, Publishing, and the Workplace	2023	Handbook of Research on Advancements of Contactless Technology and Service Innovation in Library and Information Science				316	340			10.4018/978-1-6684-7693-2.ch016	https://www.scopus.com/inward/record.uri?eid=2-s2.0-85167751898&doi=10.4018%2f978-1-6684-7693-2.ch016&partnerID=40&md5=e75f056755cc6d8d62836b054d4c4f70		Holland, B.J.	November 2022, ChatGPT, a powerful chat-like AI tool, was created by a company named Open AI. ChatGPT is a large language model (LLM) and a subset of machine learning that can identify, condense, translate, predict, and produce text. The large language model (LLM), sometimes called “autocomplete on steroids,” has drawn attention for its ability to present human-like answers to queries. Its work h…																								Bhuiyan, J., Microsoft reportedly added ChatGPT to Bing search engine (2023) The Guardian, , https://www.theguardian.com/profile/johana-bhuiyan, January 18, Retrieved February 21, 2023, from; Elias, J., (2023) Jennifer Elias on linkedin: Google is asking employees to test potential CHATGPT competitors.., , https://www.linkedin.com/posts/jenniferelias-845b1130_google-is-asking-employees-to-test-po…				IGI Global
73	Hosseini M., Gao C.A., Liebovitz D.M., Carvalho A.M., Ahmad F.S., Luo Y., MacDonald N., Holmes K.L., Kho A.	57214013066;57221258061;16064050400;58291275100;54392524600;55712619800;58290702700;7201657714;16230386100;	An exploratory survey about using ChatGPT in education, healthcare, and research	2023	PLoS ONE	18	10 October	e0292216				5	10.1371/journal.pone.0292216	https://www.scopus.com/inward/record.uri?eid=2-s2.0-85173645583&doi=10.1371%2fjournal.pone.0292216&partnerID=40&md5=e860719d51b4d6a3458620982531ac8c	Department of Preventive Medicine, Northwestern University Feinberg School of Medicine, Chicago, IL, United States; Division of Pulmonary and Critical Care, Department of Medicine, Northwestern University Feinberg School of Medicine, Chicago, IL, United States; Divisions of General Internal Medicine and Health and Biomedical Informatics, Department of Medicine, Northwestern University Feinberg Sc…	Hosseini, M., Department of Preventive Medicine, Northwestern University Feinberg School of Medicine, Chicago, IL, United States; Gao, C.A., Division of Pulmonary and Critical Care, Department of Medicine, Northwestern University Feinberg School of Medicine, Chicago, IL, United States; Liebovitz, D.M., Divisions of General Internal Medicine and Health and Biomedical Informatics, Department of Med…	Objective ChatGPT is the first large language model (LLM) to reach a large, mainstream audience. Its rapid adoption and exploration by the population at large has sparked a wide range of discussions regarding its acceptable and optimal integration in different areas. In a hybrid (virtual and in-person) panel discussion event, we examined various perspectives regarding the use of ChatGPT in educat…		adoption; adult; article; ChatGPT; education; exploratory research; female; human; human experiment; major clinical study; male; perception; qualitative analysis; quantitative analysis; uncertainty; educational status; health care facility; inclusive education; probability; university; Educational Status; Faculty; Health Facilities; Humans; Mainstreaming, Education; Probability																Yang, M., New York City schools ban AI chatbot that writes essays and answers prompts (2023) The Guardian, , https://www.theguardian.com/us-news/2023/jan/06/new-york-city-schools-ban-ai-chatbot-chatgpt, [Internet]. Jan 6 [cited 2023 Mar 27]; Mollick, E., All my classes suddenly became AI classes [Internet] (2023) One Useful Thing, , https://oneusefulthing.substack.com/p/all-my-classes-suddenly-be…	Hosseini, M.; Department of Preventive Medicine, United States; email: mohammad.hosseini@northwestern.edu			Public Library of Science					19326203		POLNC	37796786	English	PLoS ONE
74	Huang F., Deng Y., Zhang C., Guo M., Zhan K., Sun S., Jiang J., Sun Z., Wu X.	58909587000;58909366400;57225061047;58909553400;58909522800;58909397700;58559620100;58819567900;55533800700;	KOSA: KO Enhanced Salary Analytics based on Knowledge Graph and LLM Capabilities	2023	IEEE International Conference on Data Mining Workshops, ICDMW				499	505			10.1109/ICDMW60847.2023.00071	https://www.scopus.com/inward/record.uri?eid=2-s2.0-85186139735&doi=10.1109%2fICDMW60847.2023.00071&partnerID=40&md5=b9bdefe0caf5c1a1429fa8d1d70b1b38	Zhejiang Lab, Research Center for Knowledge Engineering, Zhejiang, Hangzhou, 311121, China	Huang, F., Zhejiang Lab, Research Center for Knowledge Engineering, Zhejiang, Hangzhou, 311121, China; Deng, Y., Zhejiang Lab, Research Center for Knowledge Engineering, Zhejiang, Hangzhou, 311121, China; Zhang, C., Zhejiang Lab, Research Center for Knowledge Engineering, Zhejiang, Hangzhou, 311121, China; Guo, M., Zhejiang Lab, Research Center for Knowledge Engineering, Zhejiang, Hangzhou, 31112…	Knowledge base question answering (KBQA) is designed to respond to natural language inquiries by utilizing factual information, such as entities, relationships, and attributes, derived from a knowledge base (KB). The advent of large language models (LLMs) has significantly boosted the performance of KBQA, owing to their exceptional capabilities in content comprehension and generation. In this pap…	KBQA; Knowledge Engineering; LLM; Salary distribution	Data visualization; Learning algorithms; Machine learning; Natural language processing systems; Entity-relationship; Factual information; Knowledge base question answering; Knowledge graphs; Language model; Large language model; Natural languages; Performance; Question Answering; Salary distributions; Knowledge graph					National Natural Science Foundation of China, NSFC: 62120106008	This research is supported by the National Natural Science Foundation of China (NSFC) under grant 62120106008.										Bollacker, K., Evans, C., Paritosh, P., Freebase: A collaboratively created graph database for structuring human knowledge (2008) Proceedings of the 2008 ACM SIGMOD international conference on Management of data., pp. 1247-1250; Lehmann, J., Isele, R., Jakob, M., Dbpedia-a large-scale, multilingual knowledge base extracted from wikipedia (2015) Semantic web, 6 (2), pp. 167-195; Tanon, P.T., Vrand…	Huang, F.; Zhejiang Lab, Zhejiang, China; email: huangfei@zhejianglab.com	Wang J.He Y.Dinh T.N.Grant C.Qiu M.Pedrycz W.	IEEE Computer Society;Technology Innovation Institute;TWO SIGMA;US National Science Foundation (NSF)	IEEE Computer Society	23rd IEEE International Conference on Data Mining Workshops, ICDMW 2023	1 December 2023 through 4 December 2023		197121	23759232	9798350381641			English	IEEE Int. Conf. Data Mining Workshops, ICDMW
75	Huang R.S.T., Lu K.J.Q., Meaney C., Kemppainen J., Punnett A., Leung F.-H.	58539157700;58516656400;35765360800;58695619400;6602252996;26024277400;	Assessment of Resident and AI Chatbot Performance on the University of Toronto Family Medicine Residency Progress Test: Comparative Study	2023	JMIR Medical Education	9		e50514				1	10.2196/50514	https://www.scopus.com/inward/record.uri?eid=2-s2.0-85176799279&doi=10.2196%2f50514&partnerID=40&md5=3f085251a03ecad3ab4a321038b23a3f	Temerty Faculty of Medicine, University of Toronto, Toronto, ON, Canada; Department of Family and Community Medicine, University of Toronto, Toronto, ON, Canada; Division of Haematology, The Hospital for Sick Children, Toronto, ON, Canada	Huang, R.S.T., Temerty Faculty of Medicine, University of Toronto, Toronto, ON, Canada; Lu, K.J.Q., Department of Family and Community Medicine, University of Toronto, Toronto, ON, Canada; Meaney, C., Department of Family and Community Medicine, University of Toronto, Toronto, ON, Canada; Kemppainen, J., Department of Family and Community Medicine, University of Toronto, Toronto, ON, Canada; Punn…	Background: Large language model (LLM)–based chatbots are evolving at an unprecedented pace with the release of ChatGPT, specifically GPT-3.5, and its successor, GPT-4. Their capabilities in general-purpose tasks and language generation have advanced to the point of performing excellently on various educational examination benchmarks, including medical knowledge tests. Comparing the performance o…	AI; artificial intelligence; community; education; education examination; family medicine; GPT-3.5; GPT-4; language model; large language model; LLM; machine learning, ChatGPT; medical education; medical knowledge exam; medical residents; natural language processing; NLP; test; testing; utility																							Ray, PP., ChatGPT: A comprehensive review on background, applications, key challenges, bias, ethics, limitations and future scope (2023) Internet of Things and Cyber-Physical Systems, 3, pp. 121-154. , [FREE Full text] [doi]; Kalla, D, Smith, N., Public disclosure and private decisions: equity market execution quality and order routing (2023) SSRN, 8 (3), pp. 827-833. , [FREE Full text]; Bubeck, …	Huang, R.S.T.; Temerty Faculty of Medicine University of Toronto, 1 King’s College, Cir, Canada; email: ry.huang@mail.utoronto.ca			JMIR Publications Inc.
76	Huang Y., Gomaa A., Semrau S., Haderlein M., Lettmaier S., Weissmann T., Grigo J., Tkhayat H.B., Frey B., Gaipl U., Distel L., Maier A., Fietkau R., Bert C., Putz F.	57190218062;58284137900;7801641569;36637302100;36188373700;57207843861;57715331700;58304429300;12763042700;6602782543;6701513471;23392966100;56608863700;20435731200;55908494400;	Benchmarking ChatGPT-4 on a radiation oncology in-training exam and Red Journal Gray Zone cases: potentials and challenges for ai-assisted medical education and decision making in radiation oncology	2023	Frontiers in Oncology	13		1265024				6	10.3389/fonc.2023.1265024	https://www.scopus.com/inward/record.uri?eid=2-s2.0-85173018162&doi=10.3389%2ffonc.2023.1265024&partnerID=40&md5=ae7eccb7830f3009d2be3687cddeaaad	Department of Radiation Oncology, University Hospital Erlangen, Friedrich-Alexander-Universität Erlangen-Nürnberg, Erlangen, Germany; Comprehensive Cancer Center Erlangen-EMN (CCC ER-EMN), Erlangen, Germany; Pattern Recognition Lab, Friedrich-Alexander-Universität Erlangen-Nürnberg, Erlangen, Germany	Huang, Y., Department of Radiation Oncology, University Hospital Erlangen, Friedrich-Alexander-Universität Erlangen-Nürnberg, Erlangen, Germany, Comprehensive Cancer Center Erlangen-EMN (CCC ER-EMN), Erlangen, Germany; Gomaa, A., Department of Radiation Oncology, University Hospital Erlangen, Friedrich-Alexander-Universität Erlangen-Nürnberg, Erlangen, Germany, Comprehensive Cancer Center Erlange…	Purpose: The potential of large language models in medicine for education and decision-making purposes has been demonstrated as they have achieved decent scores on medical exams such as the United States Medical Licensing Exam (USMLE) and the MedQA exam. This work aims to evaluate the performance of ChatGPT-4 in the specialized field of radiation oncology. Methods: The 38th American College of Ra…	artificial intelligence; clinical decision support (CDS); Gray Zone; large language model; natural language processing; radiotherapy	accuracy; Article; artificial intelligence; benchmarking; brachytherapy; cancer prognosis; cancer survival; ChatGPT; clinical decision making; clinical decision support system; dosimetry; human; medical education; natural language processing; radiation oncology; recurrence risk; self evaluation; toxicity; treatment planning						The authors declare no financial support was received for the research, authorship, and/or publication of this article.																Vaswani, A., Shazeer, N., Parmar, N., Uszkoreit, J., Jones, L., Gomez, A.N., Attention is all you need (2017) Adv Neural Inf Process Syst, 30. , https://papers.nips.cc/paper_files/paper/2017/hash/3f5ee243547dee91fbd053c1c4a845aa-Abstract.html, Available at: ; Brown, T., Mann, B., Ryder, N., Subbiah, M., Kaplan, J.D., Dhariwal, P., Language models are few-shot learners (2020) Adv Neural Inf Proces…	Putz, F.; Department of Radiation Oncology, Germany; email: Florian.Putz@uk-erlangen.de			Frontiers Media SA
77	Huemann Z., Lee C., Hu J., Cho S.Y., Bradshaw T.J.	58143960500;58146677700;56401281200;14014087600;55987286000;	Domain-adapted Large Language Models for Classifying Nuclear Medicine Reports	2023	Radiology: Artificial Intelligence	5	6	e220281				1	10.1148/ryai.220281	https://www.scopus.com/inward/record.uri?eid=2-s2.0-85178194951&doi=10.1148%2fryai.220281&partnerID=40&md5=a7b454b7e4a645ff881edd21aa5e0bf8	Department of Radiology, University of Wisconsin–Madison, 1111 Highland Ave, Madison, WI 53705, United States; Department of Biostatistics, University of Wisconsin–Madison, 1111 Highland Ave, Madison, WI 53705, United States; Department of Computer Science, University of Wisconsin–Madison, 1111 Highland Ave, Madison, WI 53705, United States; University of Wisconsin Carbone Cancer Center, Madison,…	Huemann, Z., Department of Radiology, University of Wisconsin–Madison, 1111 Highland Ave, Madison, WI 53705, United States; Lee, C., Department of Radiology, University of Wisconsin–Madison, 1111 Highland Ave, Madison, WI 53705, United States; Hu, J., Department of Biostatistics, University of Wisconsin–Madison, 1111 Highland Ave, Madison, WI 53705, United States, Department of Computer Science, …	Purpose: To evaluate the impact of domain adaptation on the performance of language models in predicting five-point Deauville scores on the basis of clinical fluorine 18 fluorodeoxyglucose PET/CT reports. Materials and Methods: The authors retrospectively retrieved 4542 text reports and images for fluorodeoxyglucose PET/CT lymphoma examinations from 2008 to 2018 in the University of Wisconsin–Mad…	Artificial Intelligence; Convolutional Neural Network (CNN); Deauville; Language Modeling; Lymphoma; Machine Learning; Multimodal Learning; Natural Language Processing; Nuclear Medicine; PET; PET/CT; Transfer Learning; Unsupervised Learning	fluorodeoxyglucose f 18; Article; human; language model; lymphoma; machine learning; nuclear medicine; positron emission tomography-computed tomography; sensitivity and specificity		fluorodeoxyglucose f 18, 63503-12-8			GE Healthcare	Supported by GE HealthCare.										Smit, A, Jain, S, Rajpurkar, P, Pareek, A, Ng, AY, Lungren, MP., CheXbert: combining automatic labelers and expert annotations for accurate radiology report labeling using BERT, , https://arxiv.org/abs/2004.09167, arXiv 2004.09167 [preprint] Posted April 20, 2020. Accessed August 12, 2022; Tejani, AS, Ng, YS, Xi, Y, Fielding, JR, Browning, TG, Rayan, JC., Performance of multiple pretrained BERT m…	Huemann, Z.; Department of Radiology, 1111 Highland Ave, United States; email: zhuemann@wisc.edu			Radiological Society of North America Inc.					26386100				English	Radiology: Art. Int.
78	Ibrahim H., Liu F., Asim R., Battu B., Benabderrahmane S., Alhafni B., Adnan W., Alhanai T., AlShebli B., Baghdadi R., Bélanger J.J., Beretta E., Celik K., Chaqfeh M., Daqaq M.F., Bernoussi Z.E., Fougnie D., Garcia de Soto B., Gandolfi A., Gyorgy A., Habash N., Harris J.A., Kaufman A., Kirousis L., Kocak K., Lee K., Lee S.S., Malik S., Maniatakos M., Melcher D., Mourad A., Park M., Rasras M., Reu…	58159143100;58065389600;57873139600;23134308000;36717391200;57219545882;56596515800;36162805500;14028095000;26422017200;55184651600;7006247555;55956733500;36195637700;6507760023;58315897300;11142067700;57219474603;16419630300;57189179404;6602991728;57218123971;56567442600;7003722524;57204896528;56047364600;58126665000;56289157100;25028012800;55044707800;9275987400;55634650800;6701777382;566738553…	Perception, performance, and detectability of conversational artificial intelligence across 32 university courses	2023	Scientific Reports	13	1	12187				17	10.1038/s41598-023-38964-3	https://www.scopus.com/inward/record.uri?eid=2-s2.0-85168704010&doi=10.1038%2fs41598-023-38964-3&partnerID=40&md5=ce064fbb12c4a5c99418d9595da219b3	Division of Science, New York University Abu Dhabi, Abu Dhabi, United Arab Emirates; Division of Social Science, New York University Abu Dhabi, Abu Dhabi, United Arab Emirates; Division of Engineering, New York University Abu Dhabi, Abu Dhabi, United Arab Emirates	Ibrahim, H., Division of Science, New York University Abu Dhabi, Abu Dhabi, United Arab Emirates; Liu, F., Division of Science, New York University Abu Dhabi, Abu Dhabi, United Arab Emirates; Asim, R., Division of Science, New York University Abu Dhabi, Abu Dhabi, United Arab Emirates; Battu, B., Division of Science, New York University Abu Dhabi, Abu Dhabi, United Arab Emirates; Benabderrahmane,…	The emergence of large language models has led to the development of powerful tools such as ChatGPT that can produce text indistinguishable from human-generated work. With the increasing accessibility of such technology, students across the globe may utilize it to help with their school work—a possibility that has sparked ample discussion on the integrity of student evaluation processes in the ag…		article; artificial intelligence; classifier; consensus; controlled study; human; human experiment; perception; plagiarism; interpersonal communication; perception; school; university; Artificial Intelligence; Communication; Humans; Perception; Schools; Universities					Research Institute Centers, New York University Abu Dhabi: CG001	K.M. acknowledges funding from the NYUAD Center for Interacting Urban Networks (CITIES), funded by Tamkeen under the NYUAD Research Institute Award CG001.										Larsen, B., Generative, A.I., A Game-Changer Society Needs to Be Ready For, , https://www.weforum.org/agenda/2023/01/davos23-generative-ai-a-game-changer-industries-and-society-code-developers/; Ramesh, A., Dhariwal, P., Nichol, A., Chu, C., Chen, M., (2022) Hierarchical Text-Conditional Image Generation with Clip Latents; Mostaque, E., (2022) Stable Diffusion Public Release, , https://stability.…	Rahwan, T.; Division of Science, United Arab Emirates; email: talal.rahwan@nyu.edu Zaki, Y.; Division of Science, United Arab Emirates; email: yasir.zaki@nyu.edu			Nature Research					20452322			37620342	English	Sci. Rep.
79	Insuasti J., Roa F., Zapata-Jaramillo C.M.	56880402700;58783224900;57218605354;	Computers’ Interpretations of Knowledge Representation Using Pre-Conceptual Schemas: An Approach Based on the BERT and Llama 2-Chat Models	2023	Big Data and Cognitive Computing	7	4	182					10.3390/bdcc7040182	https://www.scopus.com/inward/record.uri?eid=2-s2.0-85180700331&doi=10.3390%2fbdcc7040182&partnerID=40&md5=080cbde132b1783b7bf6bcb375a73c3e	Systems Engineering Department, University of Nariño, Pasto, 520001, Colombia; Computer and Decision Science Department, Universidad Nacional de Colombia, Medellín, 050034, Colombia	Insuasti, J., Systems Engineering Department, University of Nariño, Pasto, 520001, Colombia; Roa, F., Systems Engineering Department, University of Nariño, Pasto, 520001, Colombia; Zapata-Jaramillo, C.M., Computer and Decision Science Department, Universidad Nacional de Colombia, Medellín, 050034, Colombia	Pre-conceptual schemas are a straightforward way to represent knowledge using controlled language regardless of context. Despite the benefits of using pre-conceptual schemas by humans, they present challenges when interpreted by computers. We propose an approach to making computers able to interpret the basic pre-conceptual schemas made by humans. To do that, the construction of a linguistic corp…	computational linguistics; language models; linguistic corpus; pre-conceptual schema	Computational linguistics; Curricula; Formal languages; Large dataset; Modeling languages; Natural language processing systems; Students; Computational solutions; Conceptual schemas; Engineering undergraduates; Language model; Language processing; Linguistic corpus; Natural languages; Pre-conceptual schema; Second phase; Undergraduate projects; Knowledge representation						This research was self-funded, and it received no external funding.										Zapata, C., Arango, F., Gelbukh, A., Pre-conceptual Schema: A UML Isomorphism for Automatically Obtaining UML Conceptual Schemas, Lecture Notes in Computer Science (Artificial Intelligence Bioinformatics) (2006) Res. Comput. Sci, 4293, pp. 27-37; Torres, D., Zapata-Jaramillo, C., Villavicencio, M., Representing Interoperability Between Software Systems by Using Pre-Conceptual Schemas (2022) Int. …	Insuasti, J.; Systems Engineering Department, Colombia; email: insuasti@udenar.edu.co			Multidisciplinary Digital Publishing Institute (MDPI)					25042289				English	Big Data Cogn. Computing
80	Ismail F., Tan E., Rudolph J., Crawford J., Tan S.	58749348800;58393545200;57474074600;57196083515;57764872700;	Artificial intelligence in higher education. A protocol paper for a systematic literature review	2023	Journal of Applied Learning and Teaching	6	2		56	63		9	10.37074/jalt.2023.6.2.34	https://www.scopus.com/inward/record.uri?eid=2-s2.0-85178952010&doi=10.37074%2fjalt.2023.6.2.34&partnerID=40&md5=ad4a1934bfa831b03701a096d362a8f2	Kaplan Singapore, Singapore; Academic Division, Singapore Institute of Management, Singapore; University of Tasmania, Australia	Ismail, F., Kaplan Singapore, Singapore; Tan, E., Academic Division, Singapore Institute of Management, Singapore; Rudolph, J., Kaplan Singapore, Singapore; Crawford, J., University of Tasmania, Australia; Tan, S., Kaplan Singapore, Singapore	Higher education continues to be confronted with significant learning and teaching challenges. Still reeling from the effects of the pandemic, the sector has grappled for the past year with the advent and impact of generative artificial intelligence (AI). Since the introduction of ChatGPT by OpenAI in November 2022, a growing number of studies have discussed AI models and their impacts and influe…	Artificial Intelligence (AI); assessments; chatbots; ChatGPT; conversational agents; curriculum design; generative AI; GPT (Generative Pretrained Transformer); higher education; large language models (LLMs); systematic literature review																	Adarkwah, M. A., Amponsah, S., van Wyk, M. M., Huang, R., Tlili, A., Shehata, B., Metwally, A. H. S., Wang, H., Awareness and acceptance of ChatGPT as a generative conversational AI for transforming education by Ghanaian academics: A two-phase study (2023) Journal of Applied Learning and Teaching, 6 (2), pp. 1-16. , https://doi.org/10.37074/jalt.2023.6.2.26; Aikens, K., McKenzie, M., Vaughter, P.…	Ismail, F.; Kaplan SingaporeSingapore; email: Fadhil.md@gmail.com			Kaplan Singapore					2591801X				English	J. Appl. Learn. Teach.
81	Ivanov S., Soliman M.	19337727400;56092403500;	Game of algorithms: ChatGPT implications for the future of tourism education and research	2023	Journal of Tourism Futures	9	2		214	221		50	10.1108/JTF-02-2023-0038	https://www.scopus.com/inward/record.uri?eid=2-s2.0-85152066595&doi=10.1108%2fJTF-02-2023-0038&partnerID=40&md5=b5c4eac36fb89c97ffb6af425332a70a	Varna University of Management, Varna, Bulgaria; Zangador Research Institute, Varna, Bulgaria; University of Technology and Applied Sciences, Salalah, Oman; Fayoum University, Fayoum, Egypt	Ivanov, S., Varna University of Management, Varna, Bulgaria, Zangador Research Institute, Varna, Bulgaria; Soliman, M., University of Technology and Applied Sciences, Salalah, Oman, Fayoum University, Fayoum, Egypt	Purpose: The paper aims to evaluate the ways ChatGPT is going to disrupt tourism education and research. Design/methodology/approach: This is a conceptual paper. Findings: ChatGPT has the potential to revolutionize tourism education and research because it can do what students and researchers should do, namely, generate text (assignments and research papers). Universities will need to reevaluate …	ChatGPT; Intelligent automation; Large language models; Tourism education; Tourism research																	Abou-Shouk, M., Soliman, M., The impact of gamification adoption intention on brand awareness and loyalty in tourism: the mediating effect of customer engagement (2021) Journal of Destination Marketing and Management, 20; Adamopoulou, E., Moussiades, L., An overview of chatbot technology (2020) Proceedings of the 16th IFIP WG 12.5 International Conference Artificial Intelligence Applications and …	Ivanov, S.; Varna University of ManagementBulgaria; email: stanislav.ivanov@vumk.eu			Emerald Publishing					20555911				English	J. Tour. Futur.
82	Jahan I.	57529664900;	The turag river case: Declaring the rivers in Bangladesh as legal persons	2020	Journal of Water Law	27	1		35	36				https://www.scopus.com/inward/record.uri?eid=2-s2.0-85102012399&partnerID=40&md5=d1af887acc58b7118cfbe84a4bd1b6c9	Bangladesh Judicial Service	Jahan, I., Bangladesh Judicial Service	* LLB (Hons), LLM (University of Dhaka, Bangladesh); Master of Environmental Law (University of Melbourne, Australia). © 2020 Lawtext Publishing Ltd.. All rights reserved.																		Human Rights and Peace for Bangladesh v Government of Bangladesh and Others (2016) HCD, , [Writ Petitio 13989/2016]; Colombia: the Atrato River legal decision https://www.internationalrivers.org/resources/colombia-the-atrato-riverlegal-decision-16827, International Rivers; Roy, Eleanor Ainge, New Zealand river granted same legal rights as human being (2017) The Guardian, , https://www.theguardian…	Jahan, I.; Bangladesh Judicial Service			Lawtext Publishing Ltd.					14785277				English	J. Water Law
83	Jankovic A., Mincic D., Petrovic N., Tosic M.	58761108800;58761159900;57206900973;7006349903;	ChatGPT Assisted Development of Laravel Applications	2023	2023 International Conference on Advanced Technologies, Systems and Services in Telecommunications, TELSIKS 2023				340	343			10.1109/TELSIKS57806.2023.10316094	https://www.scopus.com/inward/record.uri?eid=2-s2.0-85179622988&doi=10.1109%2fTELSIKS57806.2023.10316094&partnerID=40&md5=20146377cdadafc285526ebca04b303e	University of Nis, Faculty of Electronic Engineering, Niš, 18000, Serbia	Jankovic, A., University of Nis, Faculty of Electronic Engineering, Niš, 18000, Serbia; Mincic, D., University of Nis, Faculty of Electronic Engineering, Niš, 18000, Serbia; Petrovic, N., University of Nis, Faculty of Electronic Engineering, Niš, 18000, Serbia; Tosic, M., University of Nis, Faculty of Electronic Engineering, Niš, 18000, Serbia	Rapid progress in machine learning has given rise to a multitude of approaches for various application domains. However, comparing the functionality and effectiveness of these approaches is crucial to obtain accurate and reliable results. In this study, we aim to explore the potential of ChatGPT, a cutting-edge conversational AI model, for coding applications. Our primary goal is to evaluate the …	ChatGPT; code completion; Laravel; Large Language Model (LLM)	Artificial intelligence; Applications domains; ChatGPT; Code completions; Cutting edges; Language model; Laravel; Large language model; Machine-learning; Reliable results; Systematic evaluation; Function evaluation					Ministarstvo Prosvete, Nauke i Tehnološkog Razvoja, MPNTR	This work has been supported by the Ministry of Education, Science and Technological Development of the Republic of Serbia.																Raaijmakers, S., Cremers, A., Krahmer, E., Westera, M., Editorial: Conversational AI (2023) Front. Artif. Intell, 6 (1-2), p. 1203910. , https://doi.org/10.3389/frai.2023.1203910; Laravel-The PHP Framework for Web Artisans, , https://laravel.com/docs, last accessed:13/07/2023; Jankovic, A., Laravel Functions Dataset [Data set] GitHub, , https://github.com/pAtisha/DataSets, Retrieved from last acc…		Doncov N.S.Stankovic Z.Z.Stosic B.P.		Institute of Electrical and Electronics Engineers Inc.	16th International Conference on Advanced Technologies, Systems and Services in Telecommunications, TELSIKS 2023	25 October 2023 through 27 October 2023		194546
84	Jeon J., Lee S., Choi S.	57297507600;57211663210;57224970347;	A systematic review of research on speech-recognition chatbots for language learning: Implications for future directions in the era of large language models	2023	Interactive Learning Environments							15	10.1080/10494820.2023.2204343	https://www.scopus.com/inward/record.uri?eid=2-s2.0-85156161566&doi=10.1080%2f10494820.2023.2204343&partnerID=40&md5=91afd2a0040ba2bb097b155a5826f1bf	Department of Literacy, Culture, and Language Education, Indiana University, Bloomington, IN, United States; Department of English Education, Hannam University, Daejeon, South Korea; Department of Computer Science and Engineering, Korea University, Seoul, South Korea	Jeon, J., Department of Literacy, Culture, and Language Education, Indiana University, Bloomington, IN, United States; Lee, S., Department of English Education, Hannam University, Daejeon, South Korea; Choi, S., Department of Computer Science and Engineering, Korea University, Seoul, South Korea	Chatbot research has received growing attention due to the rapid diversification of chatbot technology, as demonstrated by the emergence of large language models (LLMs) and their integration with automatic speech recognition. However, among various chatbot types, speech-recognition chatbots have received limited attention in relevant research reviews, despite their increasing potential for langua…	artificial intelligence‌; automatic speech recognition; Chatbot; ChatGPT‌; computer-assisted language learning; intelligent personal assistant; language learning; large language model																							Indicates the Studies Selected for Review; Ayedoun, E., Hayashi, Y., Seta, K., Toward personalized scaffolding and fading of motivational support in L2 learner–dialogue agent interactions: An exploratory study (2020) IEEE Transactions on Learning Technologies, 13 (3), pp. 604-616; Bibauw, S., François, T., Desmet, P., Discussing with a computer to practice a foreign language: Research synthesis a…	Lee, S.; Department of English Education, South Korea; email: seongyonglee77@gmail.com			Routledge
85	Joseph A.O., Joseph J.P.	57216629460;57216632874;	Smashing the Core Surgical Training Interview: A Holistic Guide to Becoming A Surgeon	2023	Smashing the Core Surgical Training Interview: A Holistic Guide to Becoming A Surgeon				1	237			10.1201/9781003350422	https://www.scopus.com/inward/record.uri?eid=2-s2.0-85173823295&doi=10.1201%2f9781003350422&partnerID=40&md5=6ed4b43a52908fc69c3db8209787dba6		Joseph, A.O.; Joseph, J.P.	Smashing Core Surgical Training Interviews is a crucial roadmap through the highly competitive world of surgery, written by previous Core Surgical Training National Recruitment panel members. It provides a realistic understanding of what is expected on the interview day and how best to prepare for it. This is the perfect preparation guide for any medical student or junior doctor with a serious de…																												CRC Press
86	Kamath Barkur S., Schacht S., Lanquillon C.	58558275900;58114356600;24178557600;	Knowledge-Grounded and Self-extending NER	2023	Communications in Computer and Information Science	1836 CCIS			439	446			10.1007/978-3-031-36004-6_60	https://www.scopus.com/inward/record.uri?eid=2-s2.0-85169467561&doi=10.1007%2f978-3-031-36004-6_60&partnerID=40&md5=d3a3d232212544c1c736480de88ad4b3	University of Applied Sciences, Ansbach, Germany; University of Applied Sciences, Heilbronn, Germany	Kamath Barkur, S., University of Applied Sciences, Ansbach, Germany; Schacht, S., University of Applied Sciences, Ansbach, Germany; Lanquillon, C., University of Applied Sciences, Heilbronn, Germany	The wave of digitization has begun. Organizations deal with huge amounts of data, such as logs, websites, and documents. A common way to make the information contained in these sources machine-accessible for automated processing is to first extract the information and then store it in a knowledge graph. A key task in this approach is to recognize entities. While common named entity recognition (N…	Chatbots; Knowledge Graphs; Large Language Models; Named Entity Recognition (NER)	Data mining; Automated processing; Chatbots; Digitisation; Entity recognition; Knowledge graphs; Language model; Large language model; Named entity recognition; Recognition models; Knowledge graph					ICN2021-004; T2EDK-04616; 2021R1A2C1014210; 101.016/2020; University of Missouri, MU; SRM Institute of Science and Technology, SRMIST; Bundesministerium für Wirtschaft und Klimaschutz, BMWK: 19A20007D; Fundação para a Ciência e a Tecnologia, FCT: UIDB/00127/2020; Ministry of Science, ICT and Future Planning, MSIP: IITP-2023-RS-2022-00156353; National Research Foundation of Korea, NRF: 2019R1A2C10…	Supported by Sidia Institute of Science and Technology http://www.sidia.com Idesam -Conservation and Sustainable Development https://www.idesam.org.	Funding. The work was supported by the Faculty of Engineering University of Nottingham Research Excellence PhD Scholarship.	Funding. This project has been generously supported by the Osborne Legacy. The financial assistance provided by the legacy has been instrumental in the successful completion of this research effort.	Acknowledgments. This research was conducted under the financial support of the University of Missouri Postdoctoral Association (MUPA) Research Award and the University of Missouri Graduate Professional Council (GPC) Research Award.	Acknowledgements. This work was supported by the National Research Foundation of Korea (NRF) grant (2021R1A2C1012377, 2019R1A2C1006316).	The simulations developed are currently being applied in a randomized control trial study which evaluates its efficiency as part of exposure therapy in a clinical setting [10]. The design case is part of a bigger research project titled VR8 which is funded by the Danish Innovation Fund [11].	This contribution results from the publicly funded joint research project RUMBA (German acronym for “Achieving a positive user experience through user-friendly design of the vehicle interior for automated driving functions”), which is funded by the German Federal Ministry for Economic Affairs and Climate Action (BMWK) on the basis of a resolution of the German Bundestag (funding code 19A20007D).	Acknowledgement. This work was supported by the National Research Foundation of Korea (NRF) grant funded by the Korea government (MIST) (No. 2021R1A2C1014210) and by the MSIT (Ministry of Science and ICT), Korea, under the ITRC (Information Technology Research Center) support program (IITP-2023-RS-2022-00156353) supervised by the IITP (Institute for Information & Communications Technology Plannin…	Acknowledgments. To everyone involved in user studies, and discussion groups, thank for your time and expertise. This research was supported by IEETA, funded through FCT in the context of the project [UIDB/00127/2020].								AI, O.: ChatGPT-a sibling of InstructGPT which is trained to follow an instruction (2023). https://chat.openai.com/chat; ArangoDB-a native multi-model database with flexible data models for documents, graphs (2023) And Key-Values, , https://www.arangodb.com/; Community, A., (2023) Python Arango-Python Driver for Arango, , https://github. com/ArangoDB-Community/python-arango; Effland, T., Collins,…	Kamath Barkur, S.; University of Applied SciencesGermany; email: s.kamath-barkur@hs-ansbach.de	Stephanidis C.Antona M.Ntoa S.Salvendy G.		Springer Science and Business Media Deutschland GmbH	25th International Conference on Human-Computer Interaction, HCII 2023	23 July 2023 through 28 July 2023		297769
87	Karunaratne T., Adesina A.	25822554100;58753481500;	Is it the new Google: Impact of ChatGPT on Students' Information Search Habits	2023	Proceedings of the European Conference on e-Learning, ECEL	2023-October			147	155				https://www.scopus.com/inward/record.uri?eid=2-s2.0-85179140528&partnerID=40&md5=8867593bc785a91e26c9ae718f62c61a	Department of Computer and Systems Sciences, Stockholm University, Kista, Sweden	Karunaratne, T., Department of Computer and Systems Sciences, Stockholm University, Kista, Sweden; Adesina, A., Department of Computer and Systems Sciences, Stockholm University, Kista, Sweden	The traditional subject of information search and retrieval (IR) paradigm shifted to an entirely new era since artificial intelligence (AI) techniques were introduced into the field. Browser-based IR solutions powered by AI for personalised recommendations-based information retrieval, such as the Google search engine, were one of the early examples. The IR field has advanced to its next level wit…	Artificial Intelligence; ChatGPT; Higher Education; Information Retrieval; Student behaviour	Artificial intelligence; Education computing; Information retrieval; Information use; Search engines; Artificial intelligence techniques; ChatGPT; Google search engine; Google+; High educations; Information search; Information search and retrieval; Information seeking; Personalized recommendation; Students' behaviors; Students																						(2022) ChatGPT, , https://chat.openai.com; (2023) ChatGPT: Implications for Teaching and Student Learning | CRLT, , https://crlt.umich.edu/blog/chatgptimplications-teaching-and-student-learning; Denscombe, M., (2010) The good research guide: For small-scale social research projects (Open UP Study Skills), , McGraw-Hill; Denscombe, M., (2021) Ebook: The Good Research Guide: Research Methods for Sm…		Johnston S.J.Singh S.		Academic Conferences and Publishing International Limited	22nd European Conference on e- Learning, ECEL 2023	26 October 2023 through 27 October 2023		194594
88	Kasper B., Brownfield A.	57225314958;55804476900;	Evaluation of a Newly Established Layered Learning Model in an Ambulatory Care Practice Setting	2018	Currents in Pharmacy Teaching and Learning	10	7		925	932		10	10.1016/j.cptl.2018.02.011	https://www.scopus.com/inward/record.uri?eid=2-s2.0-85043978744&doi=10.1016%2fj.cptl.2018.02.011&partnerID=40&md5=88acb3366925f65867c75fc7d14fc95e	University of Missouri – Kansas City School of Pharmacy at MU, Columbia, MO, United States; Harry S. Truman Memorial Veterans’ Hospital, Columbia, MO, United States; University of Missouri – Kansas City School of Pharmacy at MU, 701 South Fifth Street, Columbia, MO 65211, United States	Kasper, B., University of Missouri – Kansas City School of Pharmacy at MU, Columbia, MO, United States, Harry S. Truman Memorial Veterans’ Hospital, Columbia, MO, United States; Brownfield, A., University of Missouri – Kansas City School of Pharmacy at MU, 701 South Fifth Street, Columbia, MO 65211, United States	Background and Purpose: Given the need to accommodate overlapping longitudinal Introductory Pharmacy Practice Experience (IPPE) students and Advanced Pharmacy Practice Experience (APPE) students at regular intervals while meeting clinical demands, the opportunity to establish a layered learning model (LLM) became evident at University of Missouri - Kansas City School of Pharmacy. The purpose of t…	Ambulatory; APPE; Experiential; IPPE; Layered Learning	ambulatory care; Article; clinical pharmacy; course evaluation; human; knowledge; learning; perception; pharmacy student; priority journal; teaching; clinical competence; education; educational model; outpatient department; primary health care; problem based learning; procedures; program evaluation; standards; Ambulatory Care Facilities; Clinical Competence; Education, Pharmacy; Educational Measu…																http://www.aacp.org/RESOURCES/RESEARCH/INSTITUTIONALRESEARCH/Pages/StudentApplications,EnrollmentsandDegreesConferred.aspx; https://www.acpe-accredit.org/pharmd-program-accreditation/; Pinelli, N.R., Eckel, S.F., Vu, M.B., Weinberger, M., Roth, M.T., The layered learning practice model: Lessons learned from implementation (2016) Am J Health-Syst Pharm., 73 (24), pp. 2077-2082; Bates, J.S., Buie, …	Brownfield, A.; University of Missouri – Kansas City School of Pharmacy at MU, 701 South Fifth Street, United States; email: brownfielda@umkc.edu			Elsevier Inc.					18771297			30236430	English	Currents Pharm. Teach. Learn.
89	Kaya S., Yuksel D., Curle S.	35299610500;35218417500;57200162800;	The effects of language learning and math mindsets on academic success in an engineering program	2023	Journal of Engineering Education	112	1		90	107		5	10.1002/jee.20499	https://www.scopus.com/inward/record.uri?eid=2-s2.0-85145284252&doi=10.1002%2fjee.20499&partnerID=40&md5=091bcb37c885cd47fd5a33e48c55d91e	Academy for Learning and Teaching Excellence, University of Bedfordshire, Luton, United Kingdom; Faculty of Wellbeing, Education & Language Studies, Open University, Milton Keynes, United Kingdom; Department of Education, University of Bath, Bath, United Kingdom	Kaya, S., Academy for Learning and Teaching Excellence, University of Bedfordshire, Luton, United Kingdom; Yuksel, D., Faculty of Wellbeing, Education & Language Studies, Open University, Milton Keynes, United Kingdom; Curle, S., Department of Education, University of Bath, Bath, United Kingdom	Background: Mindsets are based on two basic assumptions: some people think that their intellectual abilities can be developed through hard work and instruction (i.e., a growth mindset), whereas others believe that nothing can change their level of intellectual ability (i.e., a fixed mindset). The association between mindsets and academic achievement has been examined in different academic subject…	academic achievement; engineering; English medium of instruction; higher education; language learning mindsets; math learning mindsets	Curricula; Professional aspects; Regression analysis; Academic achievements; Engineering program; English medium of instruction; High educations; Intellectual ability; Language learning; Language learning mindset; Math learning mindset; Mechatronic engineering; Turkishs; Students																						Aguilar, M., Engineering lecturers' views on CLIL and EMI (2017) International Journal of Bilingual Education and Bilingualism, 20 (6), pp. 722-735. , https://doi.org/10.1080/13670050.2015.1073664; Alpay, E., Ireson, J., Self-theories of intelligence of engineering students (2006) European Journal of Engineering Education, 31 (2), pp. 169-180. , https://doi.org/10.1080/03043790600567027; Al-Sheeb…	Kaya, S.; Academy for Learning and Teaching Excellence, Vicarage Street, United Kingdom; email: sibel.kaya@beds.ac.uk			John Wiley and Sons Inc
90	Kessler M.	57210637220;	Investigating connections between teacher identity and pedagogy in a content-based classroom	2021	System	100		102551				6	10.1016/j.system.2021.102551	https://www.scopus.com/inward/record.uri?eid=2-s2.0-85107907444&doi=10.1016%2fj.system.2021.102551&partnerID=40&md5=35d0dc1b2ca95c74325a8b2127130755	University of South Florida, United States	Kessler, M., University of South Florida, United States	Though much scholarship has investigated the nexus of language teachers' identities and classroom pedagogies, such studies often have focused on novice teachers in training or experienced practitioners who are working within university IEP or EAP program contexts. Crucially, little scholarship has examined contexts involving content-based instruction (CBI), where many times, instructors are not l…	Beliefs; Genre; Identity; Law; Reading; Writing							This research was supported by a Language Learning Doctoral Dissertation Grant.										Ajayi, L., How ESL teachers' sociocultural identities mediate their teacher role identities in a diverse urban school setting (2011) The Urban Review, 43, pp. 654-680; American Bar Association, 2019 standard 509 information report data overview (2019), https://www.americanbar.org/content/dam/aba/administrative/legal_education_and_admissions_to_the_bar/statistics/2019-509-enrollment-summary-report…	Kessler, M.; Department of World Languages, 4202 E. Fowler Ave., CPR 413, United States; email: mattjkess@gmail.com			Elsevier Ltd					0346251X				English	System
91	Kido K., Slain D., Kamal K.M., Lee J.C.	56654908100;6602678142;7006870429;56158228600;	Adapting the layered learning model to a virtual international exchange program	2022	Currents in Pharmacy Teaching and Learning	14	12		1500	1505			10.1016/j.cptl.2022.10.006	https://www.scopus.com/inward/record.uri?eid=2-s2.0-85142411436&doi=10.1016%2fj.cptl.2022.10.006&partnerID=40&md5=f63942cf8073aa10d521bdd2a0d18fe9	Department of Clinical Pharmacy, West Virginia University School of Pharmacy, Morgantown, WV 26506, United States; Department of Pharmaceutical Systems and Policy, West Virginia University School of Pharmacy, Morgantown, WV 26506, United States; Department of Pharmacy Practice, University of Illinois Chicago College of Pharmacy, Chicago, IL 60612, United States	Kido, K., Department of Clinical Pharmacy, West Virginia University School of Pharmacy, Morgantown, WV 26506, United States; Slain, D., Department of Clinical Pharmacy, West Virginia University School of Pharmacy, Morgantown, WV 26506, United States; Kamal, K.M., Department of Pharmaceutical Systems and Policy, West Virginia University School of Pharmacy, Morgantown, WV 26506, United States; Lee,…	Introduction: The layered learning model (LLM) is a well-established teaching approach designed for attending preceptors to train post-graduate learners and to precept students. The adaptation of a LLM to a virtual exchange program has not been previously described. The purpose of this study was to evaluate the effectiveness of the longitudinal virtual international exchange program in applying p…	Exchange program; International; Layered learning model; Virtual	adult; article; awareness; comparative effectiveness; controlled study; cultural competence; female; human; human experiment; learning; Likert scale; male; outcome assessment; pharmacy education; pharmacy practice; resident; United States; West Virginia; pharmacy (shop); school; student; university; Humans; Learning; Pharmacy; Schools; Students; Universities																						Loy, B.M., Yang, S., Moss, J.M., Kemp, D.W., Brown, J.N., Application of the layered learning practice model in an academic medical enter (2017) Hosp Pharm, 52 (4), pp. 266-272; Bates, J.S., Buie, L.W., Lyons, K., A study of layered learning in oncology (2016) Am J Pharm Educ, 80 (4), p. 68; Soric, M.M., Glowczewski, J.E., Lerman, R.M., Economic and patient satisfaction outcomes of a layered lear…	Kido, K.; Department of Clinical Pharmacy, United States; email: kazuhiko.kido0322@gmail.com			Elsevier Inc.
92	Killian C.M., Marttinen R., Howley D., Sargent J., Jones E.M.	57194761162;37081600600;57216950521;57206183124;56453762300;	“Knock, Knock::: Who’s There?” ChatGPT and Artificial Intelligence-Powered Large Language Models: Reflections on Potential Impacts Within Health and Physical Education Teacher Education	2023	Journal of Teaching in Physical Education	42	3		385	389		4	10.1123/jtpe.2023-0058	https://www.scopus.com/inward/record.uri?eid=2-s2.0-85165202171&doi=10.1123%2fjtpe.2023-0058&partnerID=40&md5=15fd4a255834a060e3fd76659bcc511a	Department of Kinesiology, University of New Hampshire, Durham, NH, United States; School of Education, George Mason University, Fairfax, VA, United States; Department of Kinesiology, Towson University, Towson, MD, United States; Institute of Educational Technology, Open University, Milton Keynes, United Kingdom; School of Kinesiology and Recreation, Illinois State University, Normal, IL, United …	Killian, C.M., Department of Kinesiology, University of New Hampshire, Durham, NH, United States; Marttinen, R., School of Education, George Mason University, Fairfax, VA, United States; Howley, D., Department of Kinesiology, Towson University, Towson, MD, United States; Sargent, J., Institute of Educational Technology, Open University, Milton Keynes, United Kingdom; Jones, E.M., School of Kinesi…	This research note suggests the emergence of Artificial Intelligence-powered chatbots like ChatGPT pose challenges to the future of higher education. We as a field should pay attention to issues and opportunities associated with this technology across learning, teaching, and research spaces. We propose ignoring, or being indifferent to, predictions about what technologies like Artificial Intellig…	chatbots; digital technology; ethics; higher education; OpenAI																	Cassidy, R., The cultural definition of physical education (1965) Quest, 4 (1), pp. 11-15. , https://doi.org/10.1080/00336297.1965.10519577; Cassidy, R., Societal determinants of human movement—The next thirty years (1971) Quest, 16 (1), pp. 48-54. , https://doi.org/10.1080/00336297.1971.10519712; Centeio, E.E., The have and have nots: An ever-present digital divide (2017) Journal of Physical Edu…	Killian, C.M.; Department of Kinesiology, United States; email: chad.killian@unh.edu			Human Kinetics Publishers Inc.					2735024				English	J. Teach. Phys. Educ.
93	Kirwan A.	57198812834;	ChatGPT and university teaching, learning and assessment: some initial reflections on teaching academic integrity in the age of Large Language Models	2023	Irish Educational Studies							1	10.1080/03323315.2023.2284901	https://www.scopus.com/inward/record.uri?eid=2-s2.0-85177696148&doi=10.1080%2f03323315.2023.2284901&partnerID=40&md5=f3098bfd87f2af2369de68663f8ecf97	Critical Skills, Office of the Dean of Teaching and Learning, Maynooth University, Maynooth, Ireland	Kirwan, A., Critical Skills, Office of the Dean of Teaching and Learning, Maynooth University, Maynooth, Ireland	Since its arrival in late 2022, ChatGPT has occupied the minds of academics, administrators and students. Reactions to the emergence of Large Language Models (LLMs) have varied but significant anxieties about their impact on assessment have arisen. To address these concerns, this article serves three purposes; firstly, it seeks to gauge the discourse surrounding Large Language Models (LLMs) focus…	Academic integrity; Assessment; ChatGPT; Large Language Models																							Alkaissi, H., McFarlane, S., Artificial Hallucinations in ChatGPT: Implications in Scientific Writing (2023) Cureus, 15 (2); Altman, S., (2022), https://twitter.com/sama/status/1601731295792414720, @sama).,. ChatGPT is Incredibly Limited, but Good Enough at Some Things to Create a Misleading Impression of Greatness. It’s a Mistake to Be Relying on It for Anything Important Right Now. It’s a Previ…	Kirwan, A.; Critical Skills, Room 8, Rowan House, Ireland; email: adrian.kirwan@mu.ie			Routledge
94	Kolisko S., Anderson C.J.	58540011200;56026186800;	Exploring Social Biases of Large Language Models in a College Artificial Intelligence Course	2023	Proceedings of the 37th AAAI Conference on Artificial Intelligence, AAAI 2023	37			15825	15833		1		https://www.scopus.com/inward/record.uri?eid=2-s2.0-85168247525&partnerID=40&md5=695d15563fb1addfe5f38970acfbfa8e	Wellesley College, United States	Kolisko, S., Wellesley College, United States; Anderson, C.J., Wellesley College, United States	Large neural network-based language models play an increasingly important role in contemporary AI. Although these models demonstrate sophisticated text generation capabilities, they have also been shown to reproduce harmful social biases contained in their training data. This paper presents a project that guides students through an exploration of social biases in large language models. As a final…		Computational linguistics; Natural language processing systems; Artificial intelligence course; College course; Evaluation metrics; Language model; Language processing; Natural languages; Network-based; Neural-networks; Text generations; Training data; Students																Abid, A., Farooqi, M., Zou, J., (2021) Persistent Anti-Muslim Bias in Large Language Models, , eprint: 2101.05783; Barocas, S., Crawford, K., Shapiro, A., Wallach, H., The Problem With Bias: Allocative Versus Representational Harms in Machine Learning (2017) Proceedings of SIGCIS 2017; (2022) BLOOM: A 176B-Parameter Open-Access Multilingual Language Model, , BigScience. ArXiv, abs/2211.05100; Bla…		Williams B.Chen Y.Neville J.	Association for the Advancement of Artificial Intelligence	AAAI Press	37th AAAI Conference on Artificial Intelligence, AAAI 2023	7 February 2023 through 14 February 2023		190493		9781577358800			English	Proc. AAAI Conf. Artif. Intell., AAAI
95	Kostka I., Toncelli R.	57003533400;58609182700;	Exploring Applications of ChatGPT to English Language Teaching: Opportunities, Challenges, and Recommendations	2023	TESL-EJ	27	3					5	10.55593/ej.27107int	https://www.scopus.com/inward/record.uri?eid=2-s2.0-85171800238&doi=10.55593%2fej.27107int&partnerID=40&md5=a1539d497125a4340f19cb0cefd35d69	Northeastern University, United States	Kostka, I., Northeastern University, United States; Toncelli, R., Northeastern University, United States	By utilizing a massive corpus of textual data, large language models can generate unique human-like outputs to questions and interact with users in a natural conversational way. ChatGPT is one such platform, and since it emerged into the public consciousness in November 2022, it has generated both excitement and concern among educators. A growing body of scholarship has considered the pedagogical…	21st century skills; ChatGPT; English language teaching; generative AI; higher education; human-machine collaboration																	Abramson, A., How to use ChatGPT as a learning tool (2023) Monitor on Psychology, 54 (4). , https://www.apa.org/monitor/2023/06/chatgpt-learning-tool, (April 7); Akgun, S., Greenhow, C., Artificial intelligence in education: Addressing ethical challenges in K-12 settings (2022) AI and Ethics (Online), 2 (3), pp. 431-440. , https://doi.org/10.1007/s43681-021-00096-7; Anderson, L. W., Krathwohl, D.…				Editorial Board TESL - EJ					10724303				English	TESL-EJ
96	Koto F., Aisyah N., Li H., Baldwin T.	56572738100;57217902481;57212087757;8716547300;	Large Language Models Only Pass Primary School Exams in Indonesia: A Comprehensive Test on IndoMMLU	2023	EMNLP 2023 - 2023 Conference on Empirical Methods in Natural Language Processing, Proceedings				12359	12374				https://www.scopus.com/inward/record.uri?eid=2-s2.0-85184799846&partnerID=40&md5=79945fc6d257d7e146234068cbda9d4d	Department Natural Language Processing, MBZUAI, United Arab Emirates; Quantic School of Business and Technology, United States; The University of Melbourne, Australia	Koto, F., Department Natural Language Processing, MBZUAI, United Arab Emirates; Aisyah, N., Quantic School of Business and Technology, United States; Li, H., Department Natural Language Processing, MBZUAI, United Arab Emirates; Baldwin, T., Department Natural Language Processing, MBZUAI, United Arab Emirates, The University of Melbourne, Australia	Although large language models (LLMs) are often pre-trained on large-scale multilingual texts, their reasoning abilities and real-world knowledge are mainly evaluated based on English datasets. Assessing LLM capabilities beyond English is increasingly vital but hindered due to the lack of suitable datasets. In this work, we introduce IndoMMLU, the first multi-task language understanding benchmark…		Computational linguistics; Indonesia; Indonesian languages; Language model; Large-scales; Multi tasks; Multilingual texts; Primary schools; Real-world; Reasoning ability; World knowledge; Large datasets																Baradaran, Razieh, Ghiasi, Razieh, Amirkhani, Hossein, A survey on machine reading comprehension systems (2022) Natural Language Engineering, 28 (6), pp. 683-732; Bisk, Yonatan, Zellers, Rowan, Gao, Jianfeng, Choi, Yejin, PIQA: Reasoning about physical commonsense in natural language (2020) Proceedings of the AAAI conference on artificial intelligence, pp. 7432-7439; Cahyawijaya, Samuel, Lovenia,…		Bouamor H.Pino J.Bali K.	ahrefs;Amazon;Bloomberg;et al.;Google Research;GTCOM	Association for Computational Linguistics (ACL)	2023 Conference on Empirical Methods in Natural Language Processing, EMNLP 2023	6 December 2023 through 10 December 2023		196512		9798891760608			English	EMNLP - Conf. Empir. Methods Nat. Lang. Process., Proc.
97	Kumar H., Yu K., Chung A., Shi J., Williams J.J.	57673888100;58135552000;58135771800;57672510900;56159570600;	Exploring the Potential of Chatbots to Provide Mental Well-being Support for Computer Science Students	2023	SIGCSE 2023 - Proceedings of the 54th ACM Technical Symposium on Computer Science Education	2			1339			3	10.1145/3545947.3576285	https://www.scopus.com/inward/record.uri?eid=2-s2.0-85149779953&doi=10.1145%2f3545947.3576285&partnerID=40&md5=514edb10677e06f63ef20e96823307ae	The University of Toronto, Toronto, ON, Canada	Kumar, H., The University of Toronto, Toronto, ON, Canada; Yu, K., The University of Toronto, Toronto, ON, Canada; Chung, A., The University of Toronto, Toronto, ON, Canada; Shi, J., The University of Toronto, Toronto, ON, Canada; Williams, J.J., The University of Toronto, Toronto, ON, Canada	Computer Science students are affected by a number of stressors, such as competition, which make it difficult for them to manage their mental well-being and mood. Students are often reluctant to use existing resources for support because they are difficult to access or perceived as ineffective. Conversational agents have shown potential to provide accessible and effective support to improve well-…	chatbots; field study; gpt-3; large language models; mental well-being; stress	Education computing; Chatbots; Computer science students; Conversational agents; Field studies; Gpt-3; Language model; Large language model; Mental well-being; Problem space; Well being; Students																Daniel Ebert, D., Mortier, P., Kaehlke, F., Bruffaerts, R., Baumeister, H., Auerbach, R.P., Alonso Vilagut, J., (2019) Barriers of Mental Health Treatment Utilization among First-year College Students: First Crossnational Results from the WHOWorld Mental Health International College Student Initiative, 2 (28), p. e1782. , https://doi.org/10.1002/mpr.1782; Eisenberg, D., Golberstein, E., Hunt, J.B…			ACM Special Interest Group on Computer Science Education (ACM SIGCSE);Association for Computing Machinery (ACM)	Association for Computing Machinery, Inc	54th ACM Technical Symposium on Computer Science Education, SIGCSE 2023	15 March 2023 through 18 March 2023		187022		9781450394338			English	SIGCSE - Proc. ACM Tech. Symp. Comput. Sci. Educ.
98	Kuramitsu K., Obara Y., Sato M., Obara M.	6603910588;58735209200;58123946100;57338213700;	KOGI: A Seamless Integration of ChatGPT into Jupyter Environments for Programming Education	2023	SPLASH-E 2023 - Proceedings of the 2023 ACM SIGPLAN International Symposium on SPLASH-E, Co-located with: SPLASH 2023				50	59			10.1145/3622780.3623648	https://www.scopus.com/inward/record.uri?eid=2-s2.0-85178258738&doi=10.1145%2f3622780.3623648&partnerID=40&md5=7db33fdef3ec889be22fb5a2400d9f83	Japan Womens University, Tokyo, Japan	Kuramitsu, K., Japan Womens University, Tokyo, Japan; Obara, Y., Japan Womens University, Tokyo, Japan; Sato, M., Japan Womens University, Tokyo, Japan; Obara, M., Japan Womens University, Tokyo, Japan	The impact of ChatGPT has brought both anxiety and anticipation to schools and universities. Exploring a positive method to improve programming skills with ChatGPT is a new and pressing challenge. In pursuit of this goal, we have developed KOGI, a learning support system that integrates ChatGPT into the Jupyter environment. This paper demonstrates how KOGI enables students to receive timely advic…	ChatGPT; classroom experience; LLM; programming education	Education computing; ChatGPT; Classroom experience; Introductory course; Learning support systems; LLM; Pressung; Programming education; Programming skills; Seamless integration; Students					Japan Society for the Promotion of Science, JSPS: 23K11374	This work was supported by JSPS KAKENHI Grant Number 23K11374.										Akinobu, Y., Obara, M., Kajiura, T., Takano, S., Tamura, M., Tomioka, M., Kuramitsu, K., Is Neural Machine Translation Approach Accurate Enough for Coding Assistance (2021) Proceedings of the 1st ACM SIGPLAN International Workshop on beyond Code: No Code (Chicago, IL, USA) (BCNC 2021), pp. 23-28. , https://doi.org/10.1145/3486949.3486966, Association for Computing Machinery, New York, NY, USA; Br…		Feldman M.Q.Hilton M.	ACM SIGAda;ACM SIGPLAN	Association for Computing Machinery, Inc	2023 ACM SIGPLAN International Symposium on SPLASH-E, SPLASH-E 2023	25 October 2023		194217		9798400703904			English	SPLASH-E - Proc. ACM SIGPLAN Int. Symp. SPLASH-E, Co-located: SPLASH
99	Laato S., Morschheuser B., Hamari J., Bjorne J.	57195940928;56902643500;35361989600;16027873300;	AI-Assisted Learning with ChatGPT and Large Language Models: Implications for Higher Education	2023	Proceedings - 2023 IEEE International Conference on Advanced Learning Technologies, ICALT 2023				226	230		3	10.1109/ICALT58122.2023.00072	https://www.scopus.com/inward/record.uri?eid=2-s2.0-85174404773&doi=10.1109%2fICALT58122.2023.00072&partnerID=40&md5=0c2979f605818acdd2ec59ac90892a4c	Tampere University, Gamification Group, Tampere, Finland; Inst. of Information Systems, Fau Erlangen-Nürnberg, Nuremberg, Germany; University of Turku, Dept. of Computing, Turku, Finland	Laato, S., Tampere University, Gamification Group, Tampere, Finland; Morschheuser, B., Inst. of Information Systems, Fau Erlangen-Nürnberg, Nuremberg, Germany; Hamari, J., Tampere University, Gamification Group, Tampere, Finland; Bjorne, J., University of Turku, Dept. of Computing, Turku, Finland	The recent progress in generative AI models, particularly large language models (LLMs), has brought about a transformation in the field of education. Conversational LLM services, such as Google's Bard and OpenAI's ChatGPT, offer students access to many abilities such as summarization and generation of text and code, and on-demand replies to questions on expert topics. In this paper, we observe Ch…	Bard; ChatGPT; generative language models; GPT-4; higher education; large language models; learning	Computational linguistics; Learning systems; Students; Bard; ChatGPT; Generative language model; GPT-4; High educations; Language model; Large language model; Learning; Recent progress; Education computing																						Vaswani, A., Shazeer, N., Parmar, N., Uszkoreit, J., Jones, L., Gomez, A.N., Kaiser, Ł., Polosukhin, I., Attention is all you need (2017) Advances in neural information processing systems, 30; Floridi, L., Chiriatti, M., Gpt-3: Its nature, scope, limits, and consequences (2020) Minds and Machines, 30, pp. 681-694; Hu, K., Chatgpt sets record for fastest-growing user base - analyst note, , https:/…		Chang M.Chen N.-S.Kuo R.Rudolph G.Sampson D.G.Tlili A.		Institute of Electrical and Electronics Engineers Inc.	23rd IEEE International Conference on Advanced Learning Technologies, ICALT 2023	10 July 2023 through 13 July 2023		193030
100	Lacey M.M., Smith D.P.	37026348400;55722911000;	Teaching and assessment of the future today: higher education and AI	2023	Microbiology Australia	44	3		124	126			10.1071/MA23036	https://www.scopus.com/inward/record.uri?eid=2-s2.0-85171849435&doi=10.1071%2fMA23036&partnerID=40&md5=9fc02f599d81ee4ebc2474221dc0afd2	Sheffield Hallam University, Howard Street, Sheffield, S1 1WB, United Kingdom	Lacey, M.M., Sheffield Hallam University, Howard Street, Sheffield, S1 1WB, United Kingdom; Smith, D.P., Sheffield Hallam University, Howard Street, Sheffield, S1 1WB, United Kingdom	Artificial intelligence (AI), once a subject of science fiction, is now a tangible, disruptive force in teaching and learning. In an educational setting, generative large language models (LLM), such as OpenAI's ChatGPT, perform and supplement tasks that usually require human thought, such as data analysis, understanding complex ideas, problem-solving, coding and producing written outputs. AI adva…		article; artificial intelligence; ChatGPT; data analysis; human; human experiment; learning; problem solving; teaching; tertiary education																Sallam, M, ChatGPT utility in healthcare education, research, and practice: systematic review on the promising perspectives and valid concerns (2023) Healthcare, 11, p. 887; Chen, X, Two decades of artificial intelligence in education (2022) Educ Technol Soc, 25, pp. 28-47; Brew, M, Towards developing AI literacy: three student provocations on AI in higher education (2023) Asian J Distance Educ, …	Lacey, M.M.; Sheffield Hallam University, Howard Street, United Kingdom; email: m.lacey@shu.ac.uk			CSIRO					13244272				English	Microbiol. Australia
101	Lau S., Guo P.	57209780432;16238467300;	From "Ban It Till We Understand It" to "Resistance is Futile": How University Programming Instructors Plan to Adapt as More Students Use AI Code Generation and Explanation Tools such as ChatGPT and GitHub Copilot	2023	ICER 2023 - Proceedings of the 2023 ACM Conference on International Computing Education Research V.1				106	121		18	10.1145/3568813.3600138	https://www.scopus.com/inward/record.uri?eid=2-s2.0-85170635424&doi=10.1145%2f3568813.3600138&partnerID=40&md5=0e425afccbff85f13197ad17ea92bce6	University of California San Diego, La JollaCA, United States	Lau, S., University of California San Diego, La JollaCA, United States; Guo, P., University of California San Diego, La JollaCA, United States	Over the past year (2022-2023), recently-released AI tools such as ChatGPT and GitHub Copilot have gained significant attention from computing educators. Both researchers and practitioners have discovered that these tools can generate correct solutions to a variety of introductory programming assignments and accurately explain the contents of code. Given their current capabilities and likely adva…	AI coding tools; ChatGPT; Copilot; instructor perspectives; LLM	Education computing; AI coding tool; ChatGPT; Codegeneration; Coding tools; Copilot; Correct solution; Instructor perspective; Introductory programming; LLM; Programming assignments; Students					National Science Foundation, NSF: IIS-1845900	Thanks to all of our interview participants for sharing their time and expertise, to the ICER reviewers for their feedback, and to Majeed Kazemitabaar and Sangho Suh for their feedback. Also thanks to a well-timed Hawaii vacation for giving Philip the much-needed headspace to begin thinking about research directions in this emerging area. This material is based upon work supported by the National…										(2023) Anthropic: Introducing Claude, , https://www.anthropic.com/index/introducing-claude, Accessed: 2023-05-20; (2023) Codeium: The modern coding superpower, , https://codeium.com/, Accessed: 2023-05-20; (2023) Introducing GitHub Copilot X: Your AI pair programmer is leveling up, , https://github.com/features/preview/copilot-x, Accessed: 2023-05-20; (2023) pandas-Python Data Analysis Library, ,…			ACM Special Interest Group on Computer Science Education (SIGCSE)	Association for Computing Machinery, Inc	19th Annual ACM International Computing Education Research Conference, ICER 2023	7 August 2023 through 11 August 2023		192875		9781450399760			English	ICER - Proc. ACM Conf. Int. Comput. Educ. Res. V.1
102	Lee S., Park G.	57190076052;56276519100;	Exploring the Impact of ChatGPT Literacy on User Satisfaction: The Mediating Role of User Motivations	2023	Cyberpsychology, Behavior, and Social Networking	26	12		913	918		2	10.1089/cyber.2023.0312	https://www.scopus.com/inward/record.uri?eid=2-s2.0-85179644094&doi=10.1089%2fcyber.2023.0312&partnerID=40&md5=942ca44ade89bf6165d60531182d3a04	Department of Media and Communication, Sungkyunkwan University, Jongno-Gu, South Korea; Department of Journalism and Media Studies, New Mexico State University, Las Cruces, NM, United States	Lee, S., Department of Media and Communication, Sungkyunkwan University, Jongno-Gu, South Korea; Park, G., Department of Journalism and Media Studies, New Mexico State University, Las Cruces, NM, United States	The introduction of chat generative pretrained transformer (ChatGPT), the fastest growing large language model, has changed the landscape of artificial intelligence-human interaction in everyday life. As the social influence of ChatGPT increases, competencies in it become important life skills. This study aims to explore the determinants of ChatGPT user satisfaction to provide practical implicati…	artificial intelligence; ChatGPT; ChatGPT literacy; large language model; user motivation; user satisfaction	artificial intelligence; female; human; language; literacy; male; motivation; student; Artificial Intelligence; Female; Humans; Language; Literacy; Male; Motivation; Students					Ministry of Education, MOE; National Research Foundation of Korea, NRF: NRF-2021S1A5C2A02088387	This work was supported by the Ministry of Education of the Republic of Korea and the National Research Foundation of Korea (NRF-2021S1A5C2A02088387).										Roose, K., How ChatGPT Kicked Off an A.I. Arms Race (2023), https://www.nytimes.com/2023/02/03/technology/chatgpt-openai-artificial-intelligence.html, New York Times; [Last accessed: June 20, 2023]; van Dis, EA, Bollen, J, Zuidema, W, ChatGPT: Five priorities for research (2023) Nature, 614, pp. 224-226; Tlili, A, Shehata, B, Adarkwah, MA, What if the devil is my guardian angel: ChatGPT as a case…	Park, G.; Department of Journalism and Media Studies, 2915 McFie Circle, Milton Hall 158, United States; email: park@nmsu.edu			Mary Ann Liebert Inc.					21522715			38090765	English	Cyberpsychol. Behav. Soc. Networking
103	Leiva G.O., Vigneau G.H., Sepulveda D.Y.	58971907200;57221802453;58971907300;	Imitating Teaching: An Automated Approach Using Large Language Model	2023	Proceedings - IEEE CHILEAN Conference on Electrical, Electronics Engineering, Information and Communication Technologies, ChileCon								10.1109/CHILECON60335.2023.10418678	https://www.scopus.com/inward/record.uri?eid=2-s2.0-85189565221&doi=10.1109%2fCHILECON60335.2023.10418678&partnerID=40&md5=e4a00e2845f9b461f2ef7cbb05a1532b	Pontificia Universidad Católica de Valparaíso (PUCV), Escuela de Ingeniería Eléctrica (EIE), Valparaíso, Chile	Leiva, G.O., Pontificia Universidad Católica de Valparaíso (PUCV), Escuela de Ingeniería Eléctrica (EIE), Valparaíso, Chile; Vigneau, G.H., Pontificia Universidad Católica de Valparaíso (PUCV), Escuela de Ingeniería Eléctrica (EIE), Valparaíso, Chile; Sepulveda, D.Y., Pontificia Universidad Católica de Valparaíso (PUCV), Escuela de Ingeniería Eléctrica (EIE), Valparaíso, Chile	In this article, we present the results of fine-tuning performed on a large language model (LLM) called Falcon, which comprises 7 billion parameters (7B) and is an open-source. Our primary focus lies in enabling the model to mimic university teaching, enabling it to respond to questions and emulate the instructional style of a teacher in the course 'Circuit Theory'. To achieve this goal, we built…	Circuit Theory 1; Fine-tuning; Large Language Model (LLM); LoRA; QLoRA	Computational linguistics; Curricula; Timing circuits; Tuning; Automated approach; Circuit theory 1; Circuits theory; Fine tuning; Language model; Large language model; Low-range adapter; Parameter model; QLoRA; University teaching; Teaching																Schulman, J., Zoph, B., Kim, C., Hilton, J., (2022) Introducing ChatGPT, , November; Penedo, G., Malartic, Q., Hesslow, D., Cojocaru, R., Cappelli, A., Alobeidli, H., (2023) The RefinedWeb Dataset for Falcon LLM: Outperforming Curated Corpora with Web Data, and Web Data only, , June; Hu, E.J., Shen, Y., Wallis, P., Allen-Zhu, Z., Li, Y., Wang, S., Wang, L., Chen, W., (2021) LoRA: Low-Rank Adaptat…			Arauco;Cerveceriia Kunstmann Valdivia;ETT;Telsur - GTD Chile	Institute of Electrical and Electronics Engineers Inc.	2023 IEEE CHILEAN Conference on Electrical, Electronics Engineering, Information and Communication Technologies, ChileCon 2023	5 December 2023 through 7 December 2023		197291	28321529	9798350369533			Spanish	Proc. - IEEE CHILEAN Conf. Electr., Electron. Eng., Inf. Commun. Technol., ChileCon
104	Lemke C., Kirchner K., Anandarajah L., Herfurth F.N.	57220786224;35307613600;58001764100;58753685400;	Exploring the Student Perspective: Assessing Technology Readiness and Acceptance for Adopting Large Language Models in Higher Education	2023	Proceedings of the European Conference on e-Learning, ECEL	2023-October			156	164				https://www.scopus.com/inward/record.uri?eid=2-s2.0-85179132345&partnerID=40&md5=a0a59cab7675f7ef54ad7c47b633bcd2	Business Information Systems, Berlin School of Economics and Law, Berlin, Germany; Department of Technology, Management and Economics, Technical University of Denmark, Lyngby, Denmark; Humboldt-Universität zu Berlin, Berlin, Germany	Lemke, C., Business Information Systems, Berlin School of Economics and Law, Berlin, Germany; Kirchner, K., Department of Technology, Management and Economics, Technical University of Denmark, Lyngby, Denmark; Anandarajah, L., Humboldt-Universität zu Berlin, Berlin, Germany; Herfurth, F.N., Business Information Systems, Berlin School of Economics and Law, Berlin, Germany	Digital technologies are changing and will continue to change how we learn and teach today and in the future. With the latest developments in the field of generative artificial intelligence (AI), particularly large language models (LLMs), the question of using AI-based tools in academic education is ruling the current discussions about the transformative impact of AI in higher education (HE). The…	Higher Education; Large Language Models; Student Perspective; Technology Acceptance; Technology Readiness	Computational linguistics; Education computing; Engineering education; Least squares approximations; 'current; Digital technologies; High educations; Language model; Large language model; Latest development; Learn+; Student perspectives; Technology acceptance; Technology readiness; Students																						Alami, H., Lehoux, P., Denis, J.L., Fortin, J. P., Organizational readiness for artificial intelligence in health care: insights for decision-making and practice (2021) Journal of Health Organization and Management, 35 (1), pp. 106-114; Bang, Y., Cahyawijaya, S., Lee, N., Dai, W., Su, D., Wilie, B., Lovenia, H., Fung, P., (2023) A Multitask, Multilingual, Multimodal Evaluation of ChatGPT on Reaso…		Johnston S.J.Singh S.		Academic Conferences and Publishing International Limited	22nd European Conference on e- Learning, ECEL 2023	26 October 2023 through 27 October 2023		194594
105	Leung T.I., Sagar A., Shroff S., Henry T.L.	57023066700;53865721000;57488897900;56599931800;	Can AI Mitigate Bias in Writing Letters of Recommendation?	2023	JMIR Medical Education	9		e51494				1	10.2196/51494	https://www.scopus.com/inward/record.uri?eid=2-s2.0-85170842982&doi=10.2196%2f51494&partnerID=40&md5=d401a758c8467e8576028bfcd7cba5b2	Department of Internal Medicine (adjunct), Southern Illinois University School of Medicine, Toronto, ON, Canada; JMIR Publications, Toronto, ON, Canada; CommonSpirit Health, Chicago, IL, United States; Creighton University School of Medicine, Omaha, NE, United States; Division of Internal Medicine, Thomas Jefferson University, Philadelphia, PA, United States; Department of Medicine, Emory Univers…	Leung, T.I., Department of Internal Medicine (adjunct), Southern Illinois University School of Medicine, Toronto, ON, Canada, JMIR Publications, Toronto, ON, Canada, JMIR Publications, 130 Queens Quay East Unit, 1100, Toronto, ON M5A 0P6, Canada; Sagar, A., CommonSpirit Health, Chicago, IL, United States, Creighton University School of Medicine, Omaha, NE, United States; Shroff, S., Division of I…	Letters of recommendation play a significant role in higher education and career progression, particularly for women and underrepresented groups in medicine and science. Already, there is evidence to suggest that written letters of recommendation contain language that expresses implicit biases, or unconscious biases, and that these biases occur for all recommenders regardless of the recommender’s…	artificial intelligence; bias; career advancement; gender bias; implicit bias; large language models; leadership; letters of recommendation; medical education; promotion; sponsorship; tenure and promotion						Society of General Internal Medicine, SGIM	This article is inspired by previous related work published by the authors in the official newsletter of the Society of General Internal Medicine, SGIM Forum [59], and a workshop presentation by the authors at the 2022 Annual Meeting of the Society of General Internal Medicine [60].																Schmader, T, Whitehead, J, Wysocki, VH., A linguistic comparison of letters of recommendation for male and female chemistry and biochemistry job applicants (2007) Sex Roles, 57 (7-8), pp. 509-514. , [FREE Full text] [doi] [Medline: 18953419]; Bernstein, RH, Macy, MW, Williams, WM, Cameron, CJ, Williams-Ceci, SC, Ceci, SJ., Assessing gender bias in particle physics and social science recommendatio…	Leung, T.I.; Department of Internal Medicine (adjunct), Canada; email: tiffany.leung@jmir.org			JMIR Publications Inc.
106	Lewkowycz A., Andreassen A., Dohan D., Dyer E., Michalewski H., Ramasesh V., Slone A., Anil C., Schlag I., Gutman-Solo T., Wu Y., Neyshabur B., Gur-Ari G., Misra V.	58464452100;56448451600;57188568914;26032513300;6701557012;57219758378;57803349000;57203314100;57201861913;57809162300;57193409950;55788626200;55180711600;57222264995;	Solving Quantitative Reasoning Problems with Language Models	2022	Advances in Neural Information Processing Systems	35						27		https://www.scopus.com/inward/record.uri?eid=2-s2.0-85148450582&partnerID=40&md5=299f43e72d1203769c7ea9c452b8aa91	Google Research	Lewkowycz, A., Google Research; Andreassen, A., Google Research; Dohan, D., Google Research; Dyer, E., Google Research; Michalewski, H., Google Research; Ramasesh, V., Google Research; Slone, A., Google Research; Anil, C., Google Research; Schlag, I., Google Research; Gutman-Solo, T., Google Research; Wu, Y., Google Research; Neyshabur, B., Google Research; Gur-Ari, G., Google Research; Misra, V.…	Language models have achieved remarkable performance on a wide range of tasks that require natural language understanding. Nevertheless, state-of-the-art models have generally struggled with tasks that require quantitative reasoning, such as solving mathematics, science, and engineering problems at the college level. To help close this gap, we introduce Minerva, a large language model pretrained …		Computational linguistics; ART model; Engineering problems; Language model; Natural language understanding; Natural languages; Performance; Quantitative reasoning; Reasoning problems; Science and engineering; State of the art; Benchmarking						We thank David Andre, Jacob Austin, Maarten Bosma, Aakanksha Chowdhery, Sergey Ioffe, Colin Raffel, Charles Sutton, Christian Szegedy, Stanislas Polu, and Harrison Edwards for helpful discussions.																Raffel, Colin, Shazeer, Noam, Roberts, Adam, Lee, Katherine, Narang, Sharan, Matena, Michael, Zhou, Yanqi, Liu, Peter J, (2019) Exploring the limits of transfer learning with a unified text-to-text transformer, , arXiv preprint arXiv:1910.10683; Brown, Tom, Mann, Benjamin, Ryder, Nick, Subbiah, Melanie, Kaplan, Jared D, Dhariwal, Prafulla, Neelakantan, Arvind, Askell, Amanda, Language models are …		Koyejo S.Mohamed S.Agarwal A.Belgrave D.Cho K.Oh A.		Neural information processing systems foundation	36th Conference on Neural Information Processing Systems, NeurIPS 2022	28 November 2022 through 9 December 2022		189185
107	Li J., Meland P.H., Notland J.S., Storhaug A., Tysse J.H.	8273831100;19934033100;57218932972;58151088800;58638896200;	Evaluating the Impact of ChatGPT on Exercises of a Software Security Course	2023	International Symposium on Empirical Software Engineering and Measurement							1	10.1109/ESEM56168.2023.10304857	https://www.scopus.com/inward/record.uri?eid=2-s2.0-85178667789&doi=10.1109%2fESEM56168.2023.10304857&partnerID=40&md5=92bba2ae5dd87c083c7df1b1a85660e9	Norwegian Univ. of Science and Technology (NTNU), Dept. of Computer Science, Trondheim, Norway; Ntnu, Dept. of Computer Science, Trondheim, Norway	Li, J., Norwegian Univ. of Science and Technology (NTNU), Dept. of Computer Science, Trondheim, Norway; Meland, P.H., Ntnu, Dept. of Computer Science, Trondheim, Norway; Notland, J.S., Ntnu, Dept. of Computer Science, Trondheim, Norway; Storhaug, A., Ntnu, Dept. of Computer Science, Trondheim, Norway; Tysse, J.H., Ntnu, Dept. of Computer Science, Trondheim, Norway	Along with the development of large language models (LLMs), e.g., ChatGPT, many existing approaches and tools for software security are changing. It is, therefore, essential to understand how security-aware these models are and how these models impact software security practices and education. In exercises of a software security course at our university, we ask students to identify and fix vulner…	artificial intelligence; ChatGPT; IT education; large language models; Software security	Application programs; Computational linguistics; Curricula; Education computing; Engineering education; Technology transfer; ChatGPT; IT-education; Language model; Large language model; Security Practice; Security-aware; Software security; Sources of informations; WEB application; Web applications; Students					Florida Department of Environmental Protection, DEP: 101083594	ACKNOWLEDGMENT The research conducted in this paper has partly been related to the CyberSecPro project under the European Union’s Digital Europe Programme (DEP) (grant agreement No 101083594).																(2023) Owasp top ten, , https://owasp:org/www-project-top-ten/; Firefox web developer tool, , https://firefox-dev:tools/; (2023) Postman, , https://www:postman:com/; Owasp zed attack proxy, , https://owasp:org/www-project-zap/; Nessus vulnerability assessment, , https://www:tenable:com/products/nessus; (2023), https://owasp:org/www-project-web-security-testing-guide/v42/, OWASP" Web security test…				IEEE Computer Society	17th ACM/IEEE International Symposium on Empirical Software Engineering and Measurement, ESEM 2023	26 October 2023 through 27 October 2023		194365
108	Li Y., Sha L., Yan L., Lin J., Raković M., Galbraith K., Lyons K., Gašević D., Chen G.	58449430000;57270628400;57222734702;57211753281;57190194054;8581449700;54888691500;8549413500;57189380941;	Can large language models write reflectively	2023	Computers and Education: Artificial Intelligence	4		100140				13	10.1016/j.caeai.2023.100140	https://www.scopus.com/inward/record.uri?eid=2-s2.0-85159351677&doi=10.1016%2fj.caeai.2023.100140&partnerID=40&md5=aaa1fa32921117102f16d929976cd642	Centre for Learning Analytics, Monash University, Australia; Experiential Development and Graduate Education, Faculty of Pharmacy and Pharmaceutical Sciences, Monash University, Australia; Centre for Digital Transformation of Health, University of Melbourne, Australia	Li, Y., Centre for Learning Analytics, Monash University, Australia; Sha, L., Centre for Learning Analytics, Monash University, Australia; Yan, L., Centre for Learning Analytics, Monash University, Australia; Lin, J., Centre for Learning Analytics, Monash University, Australia; Raković, M., Centre for Learning Analytics, Monash University, Australia; Galbraith, K., Experiential Development and Gr…	Generative Large Language Models (LLMs) demonstrate impressive results in different writing tasks and have already attracted much attention from researchers and practitioners. However, there is limited research to investigate the capability of generative LLMs for reflective writing. To this end, in the present study, we have extensively reviewed the existing literature and selected 9 representati…	ChatGPT; Generative language model; Natural language processing; Reflective writing																							(2022), Aydın, Ö., & Karaarslan, E. OpenAI ChatGPT generated literature review: Digital twin in healthcare. Available at SSRN 4308687; Boud, D., Keogh, R., Walker, D., Promoting reflection in learning: A model (1985) Boundaries of adult learning 1, pp. 32-56; Brown, T., Mann, B., Ryder, N., Subbiah, M., Kaplan, J.D., Dhariwal, P., Neelakantan, A., Askell, A., Language models are few-shot learners…	Chen, G.; Centre for Learning Analytics, Australia; email: guanliang.chen@monash.edu			Elsevier B.V.
109	Lim S., Schmälzle R.	57796556700;23393626700;	Artificial intelligence for health message generation: an empirical study using a large language model (LLM) and prompt engineering	2023	Frontiers in Communication	8		1129082				8	10.3389/fcomm.2023.1129082	https://www.scopus.com/inward/record.uri?eid=2-s2.0-85161405789&doi=10.3389%2ffcomm.2023.1129082&partnerID=40&md5=479314891447ac621e0486329631ece1	Department of Communication, Michigan State University, East Lansing, MI, United States	Lim, S., Department of Communication, Michigan State University, East Lansing, MI, United States; Schmälzle, R., Department of Communication, Michigan State University, East Lansing, MI, United States	Introduction: This study introduces and examines the potential of an AI system to generate health awareness messages. The topic of folic acid, a vitamin that is critical during pregnancy, served as a test case. Method: We used prompt engineering to generate awareness messages about folic acid and compared them to the most retweeted human-generated messages via human evaluation with an university …	artificial intelligence; folic acid (FA); health communication; message generation; prompt engineering; social media																							Ahmad, F.B., Anderson, R.N., The leading causes of death in the US for 2020 (2021) Jama, 325, pp. 1829-1830. , 35788262; Amitai, Y., Fisher, N., Haringman, M., Meiraz, H., Baram, N., Leventhal, A., Increased awareness, knowledge and utilization of preconceptional folic acid in Israel following a national campaign (2004) Prev. Med, 39, pp. 731-737. , 15351539; Armstrong, J.S., (2010) Persuasive Ad…	Lim, S.; Department of Communication, United States; email: limsue@msu.edu			Frontiers Media S.A.
110	Linxen A., Opel S., Ebbing S., Beecks C.	58034810200;55620161000;58745740100;24723639300;	Prototyping a Virtual Tutor with Modular Teaching Styles	2023	Lecture Notes in Informatics (LNI), Proceedings - Series of the Gesellschaft fur Informatik (GI)	P-338			281	282			10.18420/delfi2023-56	https://www.scopus.com/inward/record.uri?eid=2-s2.0-85178629352&doi=10.18420%2fdelfi2023-56&partnerID=40&md5=cde6fd032156d8896ee7284625135985	FernUniversität Hagen, Data Science, Universitätsstr. 11, Hagen, 58097, Germany	Linxen, A., FernUniversität Hagen, Data Science, Universitätsstr. 11, Hagen, 58097, Germany; Opel, S., FernUniversität Hagen, Data Science, Universitätsstr. 11, Hagen, 58097, Germany; Ebbing, S., FernUniversität Hagen, Data Science, Universitätsstr. 11, Hagen, 58097, Germany; Beecks, C., FernUniversität Hagen, Data Science, Universitätsstr. 11, Hagen, 58097, Germany	Digitization and artificial intelligence (AI) have entered education in several different ways. While the current development of large language models enables students to access vast knowledge, virtual tutors offer a more tailored approach and better support for time-independent and individualized learning. As several AI systems have become more common in higher education, we developed a concept …	chatbot; learning analytics; learning phases; NLP; Rasa Framework; Virtual Tutor	E-learning; Education computing; Software prototyping; 'current; Chatbots; Digitisation; Language model; Learning analytic; Learning phasis; Modular teachings; Rasa framework; Teaching styles; Virtual tutors; Students																						Godinez, J., Jamil, H., Meet Cyrus (2019) Proceedings of the 34th ACM/SIGAPP Symposium on Applied Computing, , [GJ19] New York; Hobert, S., Say Hello to 8Coding Tutor9! (2019) Fortieth International Conference on Information Systems, , [Ho19] Munich		Ropke R.Schroeder U.		Gesellschaft fur Informatik (GI)	21. Fachtagung Bildungstechnologien der Gesellschaft fur Informatik e.V., DELFI 2023 - 21st Conference on Educational Technologies of the German Informatics Society, DELFI 2023	11 September 2023 through 13 September 2023		193671
111	Luo Q., Zeng W., Chen M., Peng G., Yuan X., Yin Q.	58641696900;57202213333;58628664900;56217194100;57313002900;58640792500;	Self-Attention and Transformers: Driving the Evolution of Large Language Models	2023	2023 IEEE 6th International Conference on Electronic Information and Communication Technology, ICEICT 2023				401	405		1	10.1109/ICEICT57916.2023.10245906	https://www.scopus.com/inward/record.uri?eid=2-s2.0-85173847084&doi=10.1109%2fICEICT57916.2023.10245906&partnerID=40&md5=c3558f7a3f19d5d0429b3451bce31735	School of Computer Science and Engineering, Huizhou University, Guangdong, 516007, China; School of Computer Science, Yangtze University, Hubei, 451199, China	Luo, Q., School of Computer Science and Engineering, Huizhou University, Guangdong, 516007, China; Zeng, W., School of Computer Science and Engineering, Huizhou University, Guangdong, 516007, China; Chen, M., School of Computer Science and Engineering, Huizhou University, Guangdong, 516007, China; Peng, G., School of Computer Science and Engineering, Huizhou University, Guangdong, 516007, China; …	Transformers, originally introduced for machine translation, and built upon the Self-Attention mechanism, have undergone a remarkable evolution, establishing themselves as the bedrock of large language models (LLMs). Their unparalleled capacity to model intricate relationships and capture extensive dependencies within sequences has propelled their prominence. This article, presented in a popular …	generative pretrained transformer (GPT); large language model (LLM); natural language processing (NLP); Self-Attention; transformer	Computational linguistics; Natural language processing systems; Attention mechanisms; Generative pretrained transformer; Language model; Language processing; Large language model; Machine translations; Natural language processing; Natural languages; Self-attention; Transformer; Students																						Vaswani, A., Shazeer, N., Parmar, N., Uszkoreit, J., Jones, L., Gomez, A., Kaiser, L., Polosukhin, I., (2017) Attention Is All You Need; Dosovitskiy, A., Beyer, L., Kolesnikov, A., Weissenborn, D., Zhai, X., Unterthiner, T., Dehghani, M., Houlsby, N., (2020) An Image Is Worth 16x16 Words: Transformers for Image Recognition at Scale; Radford, A., Wu, J., Child, R., Luan, D., Amodei, D., Sutskever,…	Zeng, W.; School of Computer Science and Engineering, China; email: weizeng@hzu.edu.cn			Institute of Electrical and Electronics Engineers Inc.	6th IEEE International Conference on Electronic Information and Communication Technology, ICEICT 2023	21 July 2023 through 24 July 2023		192823
112	Mai V., Bauer A., Deggelmann C., Richert A.	57211534498;58024107200;58023910900;36176257900;	Acceptance and User Needs of Coaching Chatbots: An Empirical Analysis of a StudiCoachBot’s Conversation Histories	2023	Lecture Notes in Computer Science (including subseries Lecture Notes in Artificial Intelligence and Lecture Notes in Bioinformatics)	14060 LNCS			176	190			10.1007/978-3-031-48060-7_14	https://www.scopus.com/inward/record.uri?eid=2-s2.0-85178519980&doi=10.1007%2f978-3-031-48060-7_14&partnerID=40&md5=9616a9c8fa743a492b98b93afc93512a	TH Köln/University of Applied Sciences, Cologne, Germany	Mai, V., TH Köln/University of Applied Sciences, Cologne, Germany; Bauer, A., TH Köln/University of Applied Sciences, Cologne, Germany; Deggelmann, C., TH Köln/University of Applied Sciences, Cologne, Germany; Richert, A., TH Köln/University of Applied Sciences, Cologne, Germany	As technology advances, AI-based coaching continues to offer new opportunities in supporting humans. The StudiCoachBot of TH Koeln/University of Applied Sciences is a coaching chatbot, that is designed to support students with exam anxiety through low-threshold self-reflection. It is an intent-based AI-supported chatbot and is developed in the Conversational AI framework Rasa. This paper gives in…	Acceptance; AI-based Coaching; Conversational AI; Social Presence; Working Alliance	Acceptance; AI-based coaching; Chatbots; Conversational AI; Empirical analysis; Iterative development; Social presence; Technology advances; User need; Working alliance; Artificial intelligence																						Brown, M., (2020) 2020 EDUCAUSE Horizon Report. Teaching and Learning Edition, , EDUCAUSE, Louisville; Nagarhalli, T.P., Vaze, V., Rana, N.K., A review of current trends in the development of chatbot systems (2020) 6Th International Conference on Advanced Computing and Communication Systems (ICACCS), pp. 706-710. , https://doi.org/10.1109/ICACCS48705.2020.907 4420, 2020; Kanatouri, S.: The Digita…	Mai, V.; TH Köln/University of Applied SciencesGermany; email: vanessa.mai@th-koeln.de	Zaphiris P.Ioannou A.Ioannou A.Sottilare R.A.Schwarz J.Fui-Hoon Nah F.Siau K.Wei J.Salvendy G.		Springer Science and Business Media Deutschland GmbH	25th International Conference on Human-Computer Interaction, HCII 2023	23 July 2023 through 28 July 2023		297769
113	-main.340/; Wichmann	A.	Funk	A.	Rummel	N.	Leveraging the potential of peer feedback in an academic writing activity through sense-making support (2018) European Journal of Psychology of Education	33 (1)	pp. 165-184.	https://doi.org/10.1007/s10212-017-0348-7; Wu	Y.	Schunn	C.D.	When peers agree	do students listen? The central role of feedback quality and feedback frequency in determining uptake of feedback (2020) Contemporary Educational Psychology	62	https://doi.org/10.1016/j.cedpsych.2020.101897; Yang	D.	Halfaker	A.	Kraut	R.	Hovy	E.	Identifying semantic edit intentions from revisions in Wikipedia (2017) Proceedings of the 2017 Conference on Empirical Methods in Natural Language Processing	pp. 2000-2010.	https://doi.org/10.18653/v1/D17-1213	. Copenhagen	Denmark.	Association for Computational Linguistics; Zhang	F.	Hashemi	H.B.	Hwa	R.	Litman	D.	A corpus of annotated revisions for studying argumentative writing (2017) Proceedings of the 55th Annual Meeting of the Association for Computational Linguistics	pp. 1568-1578.	https://doi.org/10.18653/v1/P17-1144	. Vancouver	Canada.	Association for Computational Linguistics; Zhang	H.	Litman	D.	Essay quality signals as weak supervision for source-based essay scoring (2021) Proceedings of the 16th Workshop on Innovative Use of NLP for Building Educational Applications	pp. 85-96.	https://aclanthology.org/2021.bea-1.9
114	Marron L.	58340541500;	Exploring the potential of ChatGPT 3.5 in higher education: Benefits, limitations, and academic integrity	2023	Handbook of Research on Redesigning Teaching, Learning, and Assessment in the Digital Era				326	349		5	10.4018/978-1-6684-8292-6.ch017	https://www.scopus.com/inward/record.uri?eid=2-s2.0-85162659898&doi=10.4018%2f978-1-6684-8292-6.ch017&partnerID=40&md5=36ff29495f918f29f81153a4eb3e1bbf	Edge Hill University, United Kingdom	Marron, L., Edge Hill University, United Kingdom	This study examines the potential benefits and challenges of using ChatGPT, a large language model, in higher education (HE) and its impact on academic integrity. The study employed an exploratory research design and was divided into three phases. Phase 1 explored ChatGPT through the lecturer's lens, Phase 2 through the student's lens, and Phase 3 through the academic integrity lens. The study ai…																		Amzalag, M., Shapira, N., Dolev, N., Two sides of the coin: Lack of academic integrity in exams during the corona pandemic, students' and lecturers' perceptions (2021) Journal of Academic Ethics, pp. 1-21. , PMID:33846681; Anders, B.A., Is using ChatGPT cheating, plagiarism, both, neither, or forward thinking? (2023) Patterns (New York, N.Y.), 4 (3), p. 100694. , PMID:36960444; Information Techno…	Marron, L.; Edge Hill UniversityUnited Kingdom			IGI Global						9781668482933; 9781668482926			English	Handb. of Res. on Redesigning Teach., Learn., and Assessment in the Dig. Era
115	McCormack T.	12797684600;	Contributions to international humanitarian law in the Philippines and beyond: Interview with his excellency judge Raul Pangalangan	2019	Asia-Pacific Perspectives on International Humanitarian Law				50	58			10.1017/9781108667203.004	https://www.scopus.com/inward/record.uri?eid=2-s2.0-85098029142&doi=10.1017%2f9781108667203.004&partnerID=40&md5=dd9fab89e0e7c9f50bc1096ed9b8abe7	International Criminal Court, The Hague, Netherlands; Faculty of Law, University of Tasmania, Australia; Melbourne Law School, Australia	McCormack, T., International Criminal Court, The Hague, Netherlands, Faculty of Law, University of Tasmania, Australia, Melbourne Law School, Australia	His Excellency Judge Raul Pangalangan currently serves as a judge of the International Criminal Court - the first Filipino national to hold that position. Judge Pangalangan is a Professor of Law and former Dean of the University of the Philippines Law School and he specialises in Constitutional Law and Public International Law. He was educated at the University of the Philippines (AB cum laude an…																		Santos, S.M., Jr., Jihad and International Humanitarian Law: Three Moro Rebel Groups in the Philippines, , this volume at Chapter 23; Abi-Saab, G., Wars of National Liberation in the Geneva Conventions and Protocols (1979) Collected Courses of the Hague Academy, 165, pp. 353-448	McCormack, T.; International Criminal CourtNetherlands			Cambridge University Press						9781108667203; 9781108497244			English	Asia-Pacific Perspectives on International Humanitarian Law
116	Methnani J., Latiri I., Dergaa I., Chamari K., Saad H.B.	57372591500;6508068840;57210321130;6602474344;57218690236;	ChatGPT for Sample-Size Calculation in Sports Medicine and Exercise Sciences: A Cautionary Note	2023	International Journal of Sports Physiology and Performance	18	10		1219	1223		4	10.1123/ijspp.2023-0109	https://www.scopus.com/inward/record.uri?eid=2-s2.0-85169510201&doi=10.1123%2fijspp.2023-0109&partnerID=40&md5=cf05f25c8bebc2df3bb4f5e37e767794	Faculty of Medicine of Sousse, University of Sousse, Sousse, Tunisia; High Institute of Sport and Physical Education, Ksar said University of Manouba, Ksar-said, Tunisia; Farhat HACHED Hospital, University of Sousse, Sousse, Tunisia; Primary Health Care Corporation (PHCC), Doha, Qatar; Aspetar, Orthopedic and Sports Medicine Hospital, FIFA Medical Center of Excellence, Doha, Qatar; Research Unit …	Methnani, J., Faculty of Medicine of Sousse, University of Sousse, Sousse, Tunisia, High Institute of Sport and Physical Education, Ksar said University of Manouba, Ksar-said, Tunisia; Latiri, I., Farhat HACHED Hospital, University of Sousse, Sousse, Tunisia; Dergaa, I., Primary Health Care Corporation (PHCC), Doha, Qatar, Aspetar, Orthopedic and Sports Medicine Hospital, FIFA Medical Center of E…	To investigate the accuracy of ChatGPT (Chat generative pretrained transformer), a large language model, in calculating sample size for sport-sciences and sports-medicine research studies. Methods: We conducted an analysis on 4 published papers (ie, examples 1–4) encompassing various study designs and approaches for calculating sample size in 3 sport-science and -medicine journals, including 3 ra…	artificial intelligence; effect size; higher education; large language model; methodology; natural language processing; peer review; power; precision; research; sport science; statistics	exercise; human; methodology; randomized controlled trial (topic); reproducibility; sport; sports medicine; Exercise; Humans; Randomized Controlled Trials as Topic; Reproducibility of Results; Research Design; Sports; Sports Medicine																Schulz, R, Langen, G, Prill, R, Reporting and transparent research practices in sports medicine and orthopaedic clinical trials: a meta-research study (2022) BMJ Open, 12 (8), p. e059347; Buttner, F, Toomey, E, McClean, S, Are questionable research practices facilitating new discoveries in sport and exercise medicine? The proportion of supported hypotheses is implausibly high (2020) Br J Sports M…	Dergaa, I.; Primary Health Care Corporation (PHCC)Qatar; email: Phd.dergaa@gmail.com			Human Kinetics Publishers Inc.					15550265			37536678	English	Int. J. Sport Physiol. Perform.
117	Milano S., McGrane J.A., Leonelli S.	57215026453;18437657300;8930372000;	Large language models challenge the future of higher education	2023	Nature Machine Intelligence	5	4		333	334		23	10.1038/s42256-023-00644-2	https://www.scopus.com/inward/record.uri?eid=2-s2.0-85151451278&doi=10.1038%2fs42256-023-00644-2&partnerID=40&md5=64de4a38d1b18554c6e25f8f4126c8f8	Exeter Centre for the Study of the Life Sciences (Egenis), University of Exeter, Exeter, United Kingdom; Melbourne Graduate School of Education, University of Melbourne, Melbourne, VIC, Australia	Milano, S., Exeter Centre for the Study of the Life Sciences (Egenis), University of Exeter, Exeter, United Kingdom; McGrane, J.A., Melbourne Graduate School of Education, University of Melbourne, Melbourne, VIC, Australia; Leonelli, S., Exeter Centre for the Study of the Life Sciences (Egenis), University of Exeter, Exeter, United Kingdom	[No abstract available]																		Choi, J.H., Hickman, K.E., Monahan, A., Schwarcz, D., (2023) SSRN; Heikkilä, M., How to spot AI-generated text (2022) MIT Technology Review, , https://www.technologyreview.com/2022/12/19/1065596/how-to-spot-ai-generated-text/; (2023) Nature, 613, p. 612; García-Morales, V.J., Garrido-Moreno, A., Martín-Rojas, R., (2021), Front. Psychol. 12; (2023) Intell, 5, p. 1; Hill, C., Lawton, W., (2018) J. …	Milano, S.; Exeter Centre for the Study of the Life Sciences (Egenis), United Kingdom; email: s.milano@exeter.ac.uk			Nature Research					25225839				English	Nat. Mach. Intell.
118	Mills A., Bali M., Eaton L.	58394333300;36171609200;58393545100;	How do we respond to generative AI in education? Open educational practices give us a framework for an ongoing process	2023	Journal of Applied Learning and Teaching	6	1		16	30		17	10.37074/jalt.2023.6.1.34	https://www.scopus.com/inward/record.uri?eid=2-s2.0-85163399879&doi=10.37074%2fjalt.2023.6.1.34&partnerID=40&md5=941c487c640bbe78e7f72a30a3bf3fea	College of Marin, Kentfield, CA, United States; Center for Learning and Teaching, The American University in Cairo, Cairo, Egypt; College Unbound, Providence, RI, United States	Mills, A., College of Marin, Kentfield, CA, United States; Bali, M., Center for Learning and Teaching, The American University in Cairo, Cairo, Egypt; Eaton, L., College Unbound, Providence, RI, United States	With the release of ChatGPT in November 2022, the field of higher education rapidly became aware that generative AI can complete or assist in many of the kinds of tasks traditionally used for assessment. This has come as a shock, on the heels of the shock of the pandemic. How should assessment practices change? Should we teach about generative AI or use it pedagogically? If so, how? Here, we prop…	ChatGPT; entangled pedagogy; generative AI; GPT-3; GPT-4; higher education; large language models; LLMs; OEP; OER; open educational practices; Open Educational Resources; open pedagogy; PICRAT																	Ahmed, S., (2014) White Men, , https://feministkilljoys.com/2014/11/04/white-men/, (November 4). feministkilljoys; Google Groups, , https://groups.google.com/g/ai-in-education; Alexander, B., Future trends forum, , https://www.youtube.com/playlist?list=PLlcx8yl6hlPC3QjlbIHzxGqCP3qRa0zcg, (n.d). [YouTube]; Anders, A, (2023) How to use ChatGPT to boost your research and teaching, , https://docs.goo…				Kaplan Singapore					2591801X				English	J. Appl. Learn. Teach.
119	Mondragon-Estrada E., Kirschning I., Nolazco-Flores J.A., Camacho-Zuñiga C.	57579391300;6508226887;9732640700;6504213461;	Fostering digital transformation in education: technology enhanced learning from professors’ experiences in emergency remote teaching	2023	Frontiers in Education	8		1250461					10.3389/feduc.2023.1250461	https://www.scopus.com/inward/record.uri?eid=2-s2.0-85169564311&doi=10.3389%2ffeduc.2023.1250461&partnerID=40&md5=e4c6843099aff2799003708a42aa0d1b	School of Engineering and Sciences, Tecnologico de Monterrey, Monterrey, Mexico; School of Engineering, Universidad de las Américas Puebla, Puebla, Mexico; Institute for the Future of Education, Tecnologico de Monterrey, Monterrey, Mexico	Mondragon-Estrada, E., School of Engineering and Sciences, Tecnologico de Monterrey, Monterrey, Mexico; Kirschning, I., School of Engineering, Universidad de las Américas Puebla, Puebla, Mexico; Nolazco-Flores, J.A., Institute for the Future of Education, Tecnologico de Monterrey, Monterrey, Mexico; Camacho-Zuñiga, C., School of Engineering and Sciences, Tecnologico de Monterrey, Monterrey, Mexic…	In this work, we aim to understand professors’ perception of the key competences as well as the best educational strategies and technological tools to guide digital transformation (DT) in education, according to their experience in emergency remote teaching (ERT). In recent years, technological advancement has driven DT in many areas, with education being among them. ERT due to COVID-19 accelerat…	digital transformation in education; educational innovation; emergency remote teaching; faculty experiences; higher education; information and communication technologies; technology enhanced learning							The authors would like to acknowledge the support of the Writing Lab, Institute for the Future of Education, Tecnologico de Monterrey, Mexico, in the production of this work.																Abbas, A., Haruna, H., Arrona-Palacios, A., Camacho-Zuñiga, C., Núñez-Daruich, S., Enríquez de la O, J.F., Students’ evaluations of teachers and recommendation based on course structure or teaching approaches: an empirical study based on the institutional dataset of student opinion survey (2022) Educ. Inf. Technol, 27, pp. 12049-12064; Abelha, M., Fernandes, S., Mesquita, D., Seabra, F., Ferreira…	Camacho-Zuñiga, C.; School of Engineering and Sciences, Mexico; email: claudia.camacho@tec.mx			Frontiers Media SA
120	Moya B.A., Eaton S.E.	58707826600;57192980851;	Examining Recommendations for Generative Artificial Intelligence Use with Integrity from a Scholarship of Teaching and Learning Lens [دراسة التوصيات المتعلقة باستخدام الذكاء االصطناعي بنزاهة من منظور التعليم والتعلم] [从教与学的学术研究角度出发审视人工智能诚信应用的建议] [Examinar recomendações para a utilização de inteligência artificial com integridade através de uma lente de bolsa de estudo de ensino e aprendizagem] [E…	2023	RELIEVE - Revista Electronica de Investigacion y Evaluacion Educativa	29	2	M1					10.30827/RELIEVE.V29I2.29295	https://www.scopus.com/inward/record.uri?eid=2-s2.0-85183095637&doi=10.30827%2fRELIEVE.V29I2.29295&partnerID=40&md5=7904df014f149e320e754bf1f2cf1b72	Universidad de Calgary, Canada	Moya, B.A., Universidad de Calgary, Canada; Eaton, S.E., Universidad de Calgary, Canada	New developments in the Artificial Intelligence (AI) field allowed the development of Generative Artificial Intelligence (GenAI), capable of creating text resembling what humans can produce. As a result, educators’ concerns in the higher education sector quickly emerged. Many organizations and experts have addressed these concerns through recommendations. In this conceptual paper, we draw from th…	Academic Integrity; Artificial Intelligence; Generative Artificial Intelligence (GenAI); Large Language Models; Scholarship of Teaching and Learning; Systems Approach						University of Calgary, U of C; Social Sciences and Humanities Research Council of Canada, SSHRC: 611-2022-0398	We are grateful to the University of Calgary Teaching and Learning Grant and to the Social Sciences and Humanities Research Council of Canada (SSHRC) (Grant #611-2022-0398) for supporting this research.										Anson, C. M., AI-based text generation and the social construction of “fraudulent authorship”: A revisitation (2022) Composition Studies, 50 (1), pp. 37-46; (2023) AAIN generative artificial intelligence guidelines, , https://www.teqsa.gov.au/sites/default/files/2023-04/aain-generative-ai-guidelines.pdf; Bearman, M., Luckin, R., Preparing university assessment for a world with AI: Tasks for human…	Moya, B.A.; Universidad de Calgary, Dirección Postal, Canada; email: beatriz.moya@ucalgary.ca			Universidad de Granada					11344032				English; Arabic; Chinese; Portuguese; Spanish	RELIEVE Rev. Electron. Invest. Eval. Educ.
121	Nakanishi T.	7402644059;	An Inquirer-Responder Architecture Using LLMs: Emulating Virtual Hearing Q&A in Education	2023	Proceedings - 2023 22nd IEEE/WIC International Conference on Web Intelligence and Intelligent Agent Technology, WI-IAT 2023				526	533			10.1109/WI-IAT59888.2023.00088	https://www.scopus.com/inward/record.uri?eid=2-s2.0-85182524219&doi=10.1109%2fWI-IAT59888.2023.00088&partnerID=40&md5=0f9028daa39c279c48f56d5724fb4675	Musashino University, Department of Data Science, Tokyo, Japan	Nakanishi, T., Musashino University, Department of Data Science, Tokyo, Japan	This paper presents an Inquirer-Responder architecture consisting of multiple LLM instances and applies it to a method for automatically generating feedback comments on student reports by emulating virtual hearing Q&A. This method uses faculty education materials and student reports as inputs for multiple LLM instances. In education, quickly returning personalized feedback to each student is cruc…	automatic feedback comment generation; document understanding; educational applications; inquirer-responder architecture; Large Language Model (LLM)	Architecture; Audition; E-learning; Education computing; Automatic feedback; Automatic feedback comment generation; Document understanding; Education material; Educational Applications; Inquirer-responder architecture; Language model; Large language model; Personalized feedback; Proposed architectures; Students																						Baidoo-Anu, D., Owusu Ansah, L., (2023) Education in the Era of Generative Artificial Intelligence (AI): Understanding the Potential Benefits of ChatGPT in Promoting Teaching and Learning, , https://dx.doi.org/10.2139/ssrn.4337484, SSRN 4337484; Kasneci, E., ChatGPT for good? on opportunities and challenges of large language models for education (2023) Learning and Individual Differences, 103, p.…	Nakanishi, T.; Musashino University, Japan; email: takafumi.nakanishi@ds.musashino-u.ac.jp		Ca' Foscari University of Venice;IEEE Computer Society;Institute of Electrical and Electronics Engineers (IEEE);IOS Press;Web Intelligence Consortium (WIC)	Institute of Electrical and Electronics Engineers Inc.	22nd IEEE/WIC International Conference on Web Intelligence and Intelligent Agent Technology, WI-IAT 2023	26 October 2023 through 29 October 2023		195652
122	Neumann M., Rauschenberger M., Schon E.-M.	57222129168;55480367700;57188560423;	'We Need To Talk About ChatGPT': The Future of AI and Higher Education	2023	Proceedings - 2023 IEEE/ACM 5th International Workshop on Software Engineering Education for the Next Generation, SEENG 2023				29	32		11	10.1109/SEENG59157.2023.00010	https://www.scopus.com/inward/record.uri?eid=2-s2.0-85168683291&doi=10.1109%2fSEENG59157.2023.00010&partnerID=40&md5=737853ad0aecc58f5a9ebe8a194a7afd	University of Applied Sciences and Arts Hannover, Hannover, Germany; University of Applied Sciences Emden/Leer, Emden, Germany	Neumann, M., University of Applied Sciences and Arts Hannover, Hannover, Germany; Rauschenberger, M., University of Applied Sciences and Arts Hannover, Hannover, Germany; Schon, E.-M., University of Applied Sciences Emden/Leer, Emden, Germany	On November 30th, 2022, OpenAI released the large language model ChatGPT, an extension of GPT-3. The AI chatbot provides real-time communication in response to users' requests. The quality of ChatGPT's natural speaking answers marks a major shift in how we will use AI-generated information in our day-to-day lives. For a software engineering student, the use cases for ChatGPT are manifold: assessm…	AI influences; ChatGPT; GPT-3; higher education; large language model; position paper	Software engineering; AI influence; Chatbots; ChatGPT; GPT-3; High educations; Language model; Large language model; Position papers; Real-time communication; Scientific writing; Computational linguistics																						(2022) Chatgpt: Optimizing language models for dialogue, , https://openai.com/blog/chatgpt/; Haque, M.U., Dharmadasa, I., (2022) i think this is the most disruptive technology: Exploring sentiments of chatgpt early adopters using twitter data; Neumann, M., Rauschenberger, M., Schon, E.-M., (2023) Research protocol, , https://figshare.com/s/07fefa4448f6373ab710; Rudolph, J., Tan, S., Tan, S., Bull…	Neumann, M.; University of Applied Sciences and Arts HannoverGermany; email: michael.neumann@hs-hannover.de			Institute of Electrical and Electronics Engineers Inc.	5th IEEE/ACM International Workshop on Software Engineering Education for the Next Generation, SEENG 2023	2023-05-16		191214
123	Nguyen D., Swanson D., Newbury A., Kim Y.H.	58484925800;58773897400;57202112419;56590645600;	Evaluation of ChatGPT and Google Bard Using Prompt Engineering in Cancer Screening Algorithms	2023	Academic Radiology							1	10.1016/j.acra.2023.11.002	https://www.scopus.com/inward/record.uri?eid=2-s2.0-85180340892&doi=10.1016%2fj.acra.2023.11.002&partnerID=40&md5=83720d73618ef8522591f9e9e28e7d1b	University of Massachusetts Chan Medical School, Worcester, Massachusetts, United States; Department of Radiology, University of Massachusetts Chan Medical School, Worcester, Massachusetts, United States	Nguyen, D., University of Massachusetts Chan Medical School, Worcester, Massachusetts, United States; Swanson, D., University of Massachusetts Chan Medical School, Worcester, Massachusetts, United States; Newbury, A., Department of Radiology, University of Massachusetts Chan Medical School, Worcester, Massachusetts, United States; Kim, Y.H., Department of Radiology, University of Massachusetts Ch…	Large language models (LLMs) such as ChatGPT and Bard have emerged as powerful tools in medicine, showcasing strong results in tasks such as radiology report translations and research paper drafting. While their implementation in clinical practice holds promise, their response accuracy remains variable. This study aimed to evaluate the accuracy of ChatGPT and Bard in clinical decision-making base…																								Lee, P., Bubeck, S., Petro, J., Benefits, limits, and risks of GPT-4 as an AI chatbot for medicine (2023) N Engl J Med, 388 (13), pp. 1233-1239. , PMID: 36988602; (2023), 〈https://blog.google/technology/ai/bard-google-ai-search-updates/〉, Pichai S.An important next step on our AI journey. Google. Accessed: October 11; Kung, T.H., Cheatham, M., Medenilla, A., Performance of ChatGPT on USMLE: poten…	Nguyen, D.; University of Massachusetts Chan Medical SchoolUnited States; email: dan.nguyen@umassmed.edu			Elsevier Inc.
124	O'Leary D.E.	57211485631;	Using large language models to write theses and dissertations	2023	Intelligent Systems in Accounting, Finance and Management	30	4		228	234			10.1002/isaf.1547	https://www.scopus.com/inward/record.uri?eid=2-s2.0-85180497024&doi=10.1002%2fisaf.1547&partnerID=40&md5=494964c5960c0f0950f2be4bfc197497	University of Southern California, Los Angeles, CA, United States	O'Leary, D.E., University of Southern California, Los Angeles, CA, United States	There has been substantial discussion aimed at investigating the extent to which academic researchers can or should “use” large language models, such as ChatGPT and Bard, in their research papers. However, there seems to have been limited attention given to the extent to which students can use these tools for the development of theses, proposals and dissertations. This paper pushes the arguments …	ChatGPT; dissertations; Dunning–Kruger effect; education; graduate students; LIWC; theses																	Davis, J., (2022) Will AI write your thesis, , https://blogs.whitman.edu/countingfromzero/2022/08/31/will-ai-write-your-thesis/#:~:text=An%20AI%20might%20write%20a,%27t%20(yet)%20do; Dwivedi, Y.K., Kshetri, N., Hughes, L., Slade, E.L., Jeyaraj, A., Kar, A.K., Baabdullah, A.M., Albanna, H., “So what if ChatGPT wrote it?” Multidisciplinary perspectives on opportunities, challenges and implications …	O'Leary, D.E.; University of Southern CaliforniaUnited States; email: oleary@usc.edu			John Wiley and Sons Inc					15501949				English	Intell. Syst. Account. Finance Manag.
125	Oliveira P.F., Matos P.	57259933700;57193342842;	Introducing a Chatbot to the Web Portal of a Higher Education Institution to Enhance Student Interaction †	2023	Engineering Proceedings	56	1	128				1	10.3390/ASEC2023-16621	https://www.scopus.com/inward/record.uri?eid=2-s2.0-85185950569&doi=10.3390%2fASEC2023-16621&partnerID=40&md5=a6301ce3462c0a925b01c77c448a1442	Research Centre in Digitalization and Intelligent Robotics (CeDRI), Laboratório Associado para a Sustentabilidade e Tecnologia em Regiões de Montanha (SusTEC), Instituto Politécnico de Bragança, Campus de Santa Apolónia, Bragança, 5300-253, Portugal	Oliveira, P.F., Research Centre in Digitalization and Intelligent Robotics (CeDRI), Laboratório Associado para a Sustentabilidade e Tecnologia em Regiões de Montanha (SusTEC), Instituto Politécnico de Bragança, Campus de Santa Apolónia, Bragança, 5300-253, Portugal; Matos, P., Research Centre in Digitalization and Intelligent Robotics (CeDRI), Laboratório Associado para a Sustentabilidade e Tecno…	This paper introduces the implementation of a chatbot on the web portal of a higher education institution, aiming to enhance student interaction and provide seamless access to information and support services. With the increasing reliance on digital platforms for student engagement, a chatbot offers a user-friendly and efficient means of communication, catering to the diverse needs of students in…	artificial intelligence; chatbot; machine learning; NLP; students						Fundação para a Ciência e a Tecnologia, FCT; Ministério da Ciência, Tecnologia e Ensino Superior, MCTES: UIDB/05757/2020, UIDP/05757/2020; Southern University of Science and Technology, SUSTech: LA/P/0007/2021	The authors are grateful to the Foundation for Science and Technology (FCT, Portugal) for financial support through national funds FCT/MCTES (PIDDAC) to CeDRI (UIDB/05757/2020 and UIDP/05757/2020) and SusTEC (LA/P/0007/2021).										Sjöström, J., Dahlin, M., Tutorbot: A chatbot for higher education practice (2020) Proceedings of the Designing for Digital Transformation. Co-Creating Services with Citizens and Industry: 15th International Conference on Design Science Research in Information Systems and Technology, DESRIST 2020, pp. 93-98. , Kristiansand, Norway, 2–4 December 2020, Proceedings 15, Springer, Berlin/Heidelberg, G…	Oliveira, P.F.; Research Centre in Digitalization and Intelligent Robotics (CeDRI), Campus de Santa Apolónia, Portugal; email: poliveira@ipb.pt			Multidisciplinary Digital Publishing Institute (MDPI)					26734591				English	Eng. Proc.
126	Olney A.M.	57206567984;	Generating multiple choice questions from a textbook: LLMs match human performance on most metrics	2023	CEUR Workshop Proceedings	3487			111	128				https://www.scopus.com/inward/record.uri?eid=2-s2.0-85174188888&partnerID=40&md5=0854ac65dacb8eea7d167bfd92538bc1	Institute for Intelligent Systems, University of Memphis, 365 Innovation Drive, Suite 303, Memphis, TN 38152, United States	Olney, A.M., Institute for Intelligent Systems, University of Memphis, 365 Innovation Drive, Suite 303, Memphis, TN 38152, United States	Multiple choice questions are traditionally expensive to produce. Recent advances in large language models (LLMs) have led to fine-tuned LLMs that generate questions competitive with human-authored questions. However, the relative capabilities of ChatGPT-family models have not yet been established for this task. We present a carefully-controlled human evaluation of three conditions: a fine-tuned,…	Bing Chat; LLM; Macaw; multiple choice; question generation	Textbooks; Zero-shot learning; Bing chat; Human evaluation; Human performance; Language model; Large language model; Macaw; Multiple choice; Multiple-choice questions; Performance; Question generation; Errors					National Science Foundation, NSF: 1918751, 1934745; Institute of Education Sciences, IES: R305A190448	This material is based upon work supported by the Institute of Education Sciences under Grant R305A190448 and by the National Science Foundation under Grants 1918751 and 1934745.																Downing, S. M., Selected-response item formats in test development (2006) Handbook of Test Development, pp. 287-301. , T. M. Haladyna, S. M. Downing (Eds), Routledge, New Jersey; Gierl, M. J., Bulut, O., Guo, Q., Zhang, X., Developing, analyzing, and using distractors for multiple-choice tests in education: A comprehensive review (2017) Review of Educational Research, 87, pp. 1082-1116. , https:/…	Olney, A.M.; Institute for Intelligent Systems, 365 Innovation Drive, Suite 303, United States; email: aolney@memphis.edu	Moore S.Stamper J.Tong R.Cao C.Liu Z.Hu X.Lu Y.Liang J.Khosravi H.Denny P.Singh A.Brooks C.		CEUR-WS	1st Annual Workshop on Empowering Education with LLMs - the Next-Gen Interface and Content Generation, AIEDLLM 2023	7 July 2023		192705
127	Otsuka N., Kawanishi Y., Doi F., Takeda T., Okumura K., Yamauchi T., Yada S., Wakamiya S., Aramaki E., Makinodan M.	58571919800;58571656300;58571656400;58571143800;57217272711;23391383600;57219665421;35281103600;57203225161;23389551800;	Diagnosing psychiatric disorders from history of present illness using a large-scale linguistic model	2023	Psychiatry and Clinical Neurosciences	77	11		597	604			10.1111/pcn.13580	https://www.scopus.com/inward/record.uri?eid=2-s2.0-85170528194&doi=10.1111%2fpcn.13580&partnerID=40&md5=05262aabe3995a60b1d4d78d4a151439	Department of Psychiatry, Nara Medical University, Kashihara, Japan; Graduate School of Science and Technology, Nara Institute of Science and Technology, Ikoma, Japan	Otsuka, N., Department of Psychiatry, Nara Medical University, Kashihara, Japan; Kawanishi, Y., Department of Psychiatry, Nara Medical University, Kashihara, Japan; Doi, F., Department of Psychiatry, Nara Medical University, Kashihara, Japan; Takeda, T., Department of Psychiatry, Nara Medical University, Kashihara, Japan; Okumura, K., Department of Psychiatry, Nara Medical University, Kashihara, …	Aim: Recent advances in natural language processing models are expected to provide diagnostic assistance in psychiatry from the history of present illness (HPI). However, existing studies have been limited, with the target diseases including only major diseases, small sample sizes, or no comparison with diagnoses made by psychiatrists to ensure accuracy. Therefore, we formulated an accurate diagn…	BERT-based prediction; diagnostic prediction; history of present illness; natural language processing	adolescent; adult; Article; attention deficit hyperactivity disorder; autism; behavior disorder; clinical practice; comparative study; controlled study; data extraction; delusional disorder; dementia; diagnostic accuracy; diagnostic test accuracy study; eating disorder; electronic medical record; emotional disorder; female; history of present illness; hospital discharge; human; ICD-10; Japan; lar…					Japan Agency for Medical Research and Development, AMED: 21uk1024002h0002, 21wm04250XXs0101; Core Research for Evolutional Science and Technology, CREST: 22gm1510009h0001	AMED-PRIME (grant number 21gm6310015h0002 to M.M.), AMED-CREST (grant number 22gm1510009h0001 to M.M.), AMED (grant number 21wm04250XXs0101 to M.M.), AMED (grant number 21uk1024002h0002 to M.M.).										Squires, M., Tao, X., Elangovan, S., Deep learning and machine learning in psychiatry: A survey of current progress in depression detection, diagnosis and treatment (2023) Brain Inform., 10, p. 10; Shiba, K., Daoud, A., Kino, S., Nishi, D., Kondo, K., Kawachi, I., Uncovering heterogeneous associations of disaster-related traumatic experiences with subsequent mental health problems: A machine lear…	Makinodan, M.; Department of Psychiatry, Japan; email: mmm@naramed-u.ac.jp Aramaki, E.; Graduate School of Science and Technology, Japan; email: aramaki@is.naist.jp			John Wiley and Sons Inc					13231316		PCNEF	37526294	English	Psychiatry Clin. Neurosci.
128	Pagano S., Holzapfel S., Kappenschneider T., Meyer M., Maderbacher G., Grifka J., Holzapfel D.E.	57208445656;56278738600;57285490700;57218515506;55195367800;26643031300;55307809700;	Arthrosis diagnosis and treatment recommendations in clinical practice: an exploratory investigation with the generative AI model GPT-4	2023	Journal of Orthopaedics and Traumatology	24	1	61				4	10.1186/s10195-023-00740-4	https://www.scopus.com/inward/record.uri?eid=2-s2.0-85178058916&doi=10.1186%2fs10195-023-00740-4&partnerID=40&md5=d0c8cc670478f4489dede065aba5b051	Department of Orthopaedic Surgery, University of Regensburg, Asklepios Klinikum, Bad Abbach, Germany; Department of Neonatology, University Children’s Hospital Regensburg, Hospital St. Hedwig of the Order of St. John, University of Regensburg, Regensburg, Germany	Pagano, S., Department of Orthopaedic Surgery, University of Regensburg, Asklepios Klinikum, Bad Abbach, Germany; Holzapfel, S., Department of Neonatology, University Children’s Hospital Regensburg, Hospital St. Hedwig of the Order of St. John, University of Regensburg, Regensburg, Germany; Kappenschneider, T., Department of Orthopaedic Surgery, University of Regensburg, Asklepios Klinikum, Bad A…	Background: The spread of artificial intelligence (AI) has led to transformative advancements in diverse sectors, including healthcare. Specifically, generative writing systems have shown potential in various applications, but their effectiveness in clinical settings has been barely investigated. In this context, we evaluated the proficiency of ChatGPT-4 in diagnosing gonarthrosis and coxarthrosi…	Arthrosis; Artificial intelligence; ChatGPT-4; Large language model; Orthopaedics; Total joint replacement	adult; aged; Article; artificial intelligence; calculation; ChatGPT; clinical decision making; clinical practice; cohort analysis; conservative treatment; controlled study; diagnostic test accuracy study; female; health care; hip osteoarthritis; human; kappa statistics; knee osteoarthritis; logistic regression analysis; major clinical study; male; medical record review; observational study; ortho…					Universität Regensburg, UR											(2023) PREPRINT GPT-4 Technical report, , https://doi.org/10.48550/arXiv.2303.08774, (arXiv:2303.08774). arXiv; Eloundou, T., Manning, S., Mishkin, P., Rock, D., (2023), http://arxiv.org/abs/2303.10130, PREPRINT GPTs are GPTs: an early look at the labor market impact potential of large language models (arXiv:2303.10130). arXiv; Biswas, S.S., Role of chat GPT in public health (2023) Ann Biomed Eng…	Pagano, S.; Department of Orthopaedic Surgery, Asklepios Klinikum, Germany; email: stefano.pagano@ukr.de			Springer Science and Business Media Deutschland GmbH					15909921		JOTOB	38015298	English	J. Orthop. Traumatol.
129	Paul S., Majumdar S., Bandyopadhyay A., Dave B., Chattopadhyay S., Das P., Clough P.D., Majumder P.	57209225581;57191959417;57220708621;57213356053;55424776200;7403033292;8868565900;22934966500;	Efficiency of Large Language Models to scale up Ground Truth: Overview of the IRSE Track at Forum for Information Retrieval 2023	2023	ACM International Conference Proceeding Series				16	18			10.1145/3632754.3633480	https://www.scopus.com/inward/record.uri?eid=2-s2.0-85185405871&doi=10.1145%2f3632754.3633480&partnerID=40&md5=b1ead8968f59c91bf0f77668d7fb7113	Indian Institute of Technology, Kharagpur, India; University of Leeds, United Kingdom; Tcg Crest, Centres for Research and Education in Science and Technology, Kolkata, India; DA-IICT, Gandhinagar, India; Jadavpur University, West Bengal, India; University of Sheffield, Sheffield, United Kingdom; TPXimpact London, United Kingdom	Paul, S., Indian Institute of Technology, Kharagpur, India; Majumdar, S., Indian Institute of Technology, Kharagpur, India, University of Leeds, United Kingdom; Bandyopadhyay, A., Tcg Crest, Centres for Research and Education in Science and Technology, Kolkata, India; Dave, B., DA-IICT, Gandhinagar, India; Chattopadhyay, S., Jadavpur University, West Bengal, India; Das, P., Indian Institute of Te…	The Software Engineering Information Retrieval (IRSE) track aims to devise solutions for the automated evaluation of code comments within a machine learning framework, with labels generated by both humans and large language models. Within this track, there is a binary classification task: discerning comments as either useful or not useful. The dataset includes 9,048 pairs of code comments and sur…	Abstract syntax tree; Bert; GPT-2; Neural networks; Stanford POS Tagging	C (programming language); Computational linguistics; Large datasets; Learning systems; Machine learning; Open source software; Open systems; Syntactics; Trees (mathematics); Abstract Syntax Trees; Bert; Engineering information retrievals; GPT-2; Ground truth; Language model; Neural-networks; Scale-up; Stanford; Stanford POS tagging; Information retrieval																Bosu, A., Greiler, M., Bird, C., Characteristics of useful code reviews: An empirical study at microsoft (2015) Working Conference on Mining Software Repositories, pp. 146-156; Brown, T., Mann, B., Ryder, N., Subbiah, M., Kaplan, J.D., Dhariwal, P., Neelakantan, A., Askell, A., Language models are few-shot learners (2020) Advances in Neural Information Processing Systems, 33, pp. 1877-1901. , 202…		Ganguly D.Majumdar S.Mitra B.Gupta P.Gangopadhyay S.Majumder P.Majumder P.	ACM SIGIR;AI4ICPS � IIT Kharagpur;Department of Higher Education - Govt. of Goa	Association for Computing Machinery	15th Annual Meeting of the Forum for Information Retrieval Evaluation, FIRE 2023	15 December 2023 through 18 December 2023		197196		9798400716324			English	ACM Int. Conf. Proc. Ser.
130	Peng C., Yang X., Chen A., Smith K.E., PourNejatian N., Costa A.B., Martin C., Flores M.G., Zhang Y., Magoc T., Lipori G., Mitchell D.A., Ospina N.S., Ahmed M.M., Hogan W.R., Shenkman E.A., Guo Y., Bian J., Wu Y.	57208232081;57203172777;58036480100;57202789948;57552654300;23484900800;57541429800;57218528816;57541429900;24768383200;56442539600;7403871864;56512338100;55463628400;7101782257;6603877456;57216597174;7103200005;55645924700;	A study of generative large language model for medical research and healthcare	2023	npj Digital Medicine	6	1	210				4	10.1038/s41746-023-00958-w	https://www.scopus.com/inward/record.uri?eid=2-s2.0-85177043166&doi=10.1038%2fs41746-023-00958-w&partnerID=40&md5=f06447139be98245ab7a5d25fb263c56	Department of Health Outcomes and Biomedical Informatics, College of Medicine, University of Florida, Gainesville, FL, United States; Cancer Informatics Shared Resource, University of Florida Health Cancer Center, Gainesville, FL, United States; NVIDIA, Santa Clara, CA, United States; Research Computing, University of Florida, Gainesville, FL, United States; Integrated Data Repository Research Se…	Peng, C., Department of Health Outcomes and Biomedical Informatics, College of Medicine, University of Florida, Gainesville, FL, United States; Yang, X., Department of Health Outcomes and Biomedical Informatics, College of Medicine, University of Florida, Gainesville, FL, United States, Cancer Informatics Shared Resource, University of Florida Health Cancer Center, Gainesville, FL, United States;…	There are enormous enthusiasm and concerns in applying large language models (LLMs) to healthcare. Yet current assumptions are based on general-purpose LLMs such as ChatGPT, which are not developed for medical use. This study develops a generative clinical LLM, GatorTronGPT, using 277 billion words of text including (1) 82 billion words of clinical text from 126 clinical departments and approxima…		Computational linguistics; Health care; 'current; Language model; Language processing; Medical research; Medical use; Natural languages; Processing model; Real-world; Text generations; University of Florida; Natural language processing systems; Article; GatorTronGPT; health care; human; large language model; medical research; natural language processing; physician; reading					National Institute on Aging, NIA: 1R01AG080624, R56AG069880; National Cancer Institute, NCI: 1R01CA246418; Patient-Centered Outcomes Research Institute, PCORI: ME-2018C3-14754; University of Florida, UF; Clinical and Translational Science Institute, University of Florida, CTSI; Cancer Center, University of Florida Health, UFHCC	This study was partially supported by a Patient-Centered Outcomes Research Institute® (PCORI®) Award (ME-2018C3-14754), a grant from the National Cancer Institute, 1R01CA246418, grants from the National Institute on Aging, NIA R56AG069880 and 1R01AG080624, and the Cancer Informatics and eHealth core jointly supported by the UF Health Cancer Center and the UF Clinical and Translational Science Ins…	This study was partially supported by a Patient-Centered Outcomes Research Institute® (PCORI®) Award (ME-2018C3-14754), a grant from the National Cancer Institute, 1R01CA246418, grants from the National Institute on Aging, NIA R56AG069880 and 1R01AG080624, and the Cancer Informatics and eHealth core jointly supported by the UF Health Cancer Center and the UF Clinical and Translational Science Ins…									Introducing Chatgpt, , https://openai.com/blog/chatgpt; Lee, P., Bubeck, S., Petro, J., Benefits, limits, and risks of GPT-4 as an AI chatbot for medicine (2023) N. Engl. J. Med., 388, pp. 1233-1239. , PID: 36988602; Patel, S.B., Lam, K., ChatGPT: the future of discharge summaries? (2023) Lancet Digit Health, 5, pp. e107-e108. , COI: 1:CAS:528:DC%2BB3sXislyitLg%3D, PID: 36754724; Ali, S.R., Dobbs…	Wu, Y.; Department of Health Outcomes and Biomedical Informatics, United States; email: yonghui.wu@ufl.edu			Nature Research					23986352				English	npj Digit. Med.
131	Perkins M.	56002001000;	Academic Integrity considerations of AI Large Language Models in the post-pandemic era: ChatGPT and beyond	2023	Journal of University Teaching and Learning Practice	20	2	7				115	10.53761/1.20.02.07	https://www.scopus.com/inward/record.uri?eid=2-s2.0-85149335662&doi=10.53761%2f1.20.02.07&partnerID=40&md5=c8f9de268ebf80409260408166dbdfef	British University Vietnam, Viet Nam	Perkins, M., British University Vietnam, Viet Nam	This paper explores the academic integrity considerations of students’ use of Artificial Intelligence (AI) tools using Large Language Models (LLMs) such as ChatGPT in formal assessments. We examine the evolution of these tools, and highlight the potential ways that LLMs can support in the education of students in digital writing and beyond, including the teaching of writing and composition, the p…	Artificial Intelligence; ChatGPT; GPT-3; Large Language Models; plagiarism																							Abd-Elaal, E.-S., Gamage, S. H., Mills, J. E., Assisting academics to identify computer generated writing (2022) European Journal of Engineering Education, pp. 1-21. , https://doi.org/10.1080/03043797.2022.2046709; Alarie, B., Cockfield, A., Will machines replace us?: Machine-authored texts and the future of scholarship (2021) Law, Technology and Humans, 3 (2), pp. 5-11. , https://doi.org/10.5204…	Perkins, M.; British University VietnamViet Nam; email: mgperkins@gmail.com			University of Wollongong
132	Phippen A., Bond E.	6508204237;36642422300;	Fighting the Tide—GPT and an Alarming Sense of Déjà Vu	2023	Advanced Sciences and Technologies for Security Applications	Part F15			37	51			10.1007/978-3-031-33627-0_2	https://www.scopus.com/inward/record.uri?eid=2-s2.0-85163721203&doi=10.1007%2f978-3-031-33627-0_2&partnerID=40&md5=7e39f035a6a332db4d0e909dc996f399	Professor of Digital Rights, Bournemouth University, Poole, United Kingdom; Professor of Socio-Technical Research, University of Suffolk, Ipswich, United Kingdom	Phippen, A., Professor of Digital Rights, Bournemouth University, Poole, United Kingdom; Bond, E., Professor of Socio-Technical Research, University of Suffolk, Ipswich, United Kingdom	The emergence of Large Language Models such as GPT3 have caused ripples through academia around the impact of such tools on plagiarism and student assessment. There are claims that these tools will make the traditional assessment approaches obsolete and there has been something of a moral panic across the sector, with some universities already threatening students with academic misconduct hearing…	Artificial intelligence; Assessment; GPT; Moral panic; Technology adoption																							Greenway, D.E., (2002) The history of the English people, 1000-1154, , Oxford University Press, USA; Chowdhary, K., Chowdhary, K.R., Natural language processing (2020) Fundamentals of artificial intelligence, pp. 603-649; Brown, T., Mann, B., Ryder, N., Subbiah, M., Kaplan, J.D., Dhariwal, P., Neelakantan, A., Agarwal, S., Language models are few-shot learners (2020) Adv Neural Inf Process Syst, …	Phippen, A.; Professor of Digital Rights, United Kingdom; email: Aphippen1@bournemouth.ac.uk			Springer
133	Power T.P., Ke X., Zhao Z., Bonine N.G., Cziraky M.J., Grabner M., Barron J.J., Quimbo R., Vangerow B., Toth P.P.	55880331300;57007757000;36676111100;57191069724;6603413740;37074484700;7102686800;56719587000;6602867129;7102285226;	Clinical characteristics, patterns of lipid-lowering medication use, and health care resource utilization and costs among patients with atherosclerotic cardiovascular disease	2018	Vascular Health and Risk Management	14			23	36		4	10.2147/VHRM.S146266	https://www.scopus.com/inward/record.uri?eid=2-s2.0-85041517680&doi=10.2147%2fVHRM.S146266&partnerID=40&md5=e85bc015f974ae27265bb577e801be24	AIM Specialty Health, Chicago, IL, United States; HealthCore, Inc., Wilmington, DE, United States; Eli Lilly and Company, Indianapolis, IN, United States; CGH Medical Center, Sterling, IL, United States; Johns Hopkins University School of Medicine, Baltimore, MD, United States	Power, T.P., AIM Specialty Health, Chicago, IL, United States; Ke, X., HealthCore, Inc., Wilmington, DE, United States; Zhao, Z., Eli Lilly and Company, Indianapolis, IN, United States; Bonine, N.G., HealthCore, Inc., Wilmington, DE, United States; Cziraky, M.J., HealthCore, Inc., Wilmington, DE, United States; Grabner, M., HealthCore, Inc., Wilmington, DE, United States; Barron, J.J., HealthCore…	Purpose: The aim of this study was to investigate real-world patient characteristics, medication use, and health care resource utilization (HCRU) and costs among patients with clinical atherosclerotic cardiovascular disease (ASCVD) as defined by 2013 American College of Cardiology/ American Heart Association (ACC/AHA) guidelines, to examine burden of disease and unmet needs, such as potential und…	ASCVD; Guidelines; Health care resource utilization and costs; Lipid-lowering medications; Low-density lipoprotein cholesterol; Real-world evidence; Statins; Treatment patterns	antilipemic agent; low density lipoprotein cholesterol; antilipemic agent; biological marker; lipid; adolescent; adult; age; Article; cholesterol level; clinical feature; cohort analysis; comorbidity; coronary artery atherosclerosis; cost of illness; disease association; disease burden; drug use; female; follow up; gender; health care cost; health care need; health care utilization; health insura…		lipid, 66455-18-3; Biomarkers; Hypolipidemic Agents; Lipids			Eli Lilly and Company	Bernard B Tulsi, MSc, provided writing and other editorial support for this manuscript. We wish to recognize Debra Wertz, PharmD, Senior Director at HealthCore, Inc., for her critical review and guidance throughout the study, and in the preparation of this manuscript. This study was supported by Eli Lilly and Company.										(2015) Underlying Cause of Death 1999- 2013 on CDC WONDER Online Database, Released 2015. Data are from the Multiple Cause of Death Files, 1999-2013, as Compiled from Data Provided by the 57 Vital Statistics Jurisdictions through the Vital Statistics Cooperative Program, , http://wonder.cdc.gov/ucd-icd10.html; (2010) The Next Four Decades. the Older Population in the United States: 2010 to 2050, …	Ke, X.; HealthCore, 123 Justison Street, Suite 200, United States; email: xke@healthcore.com			Dove Medical Press Ltd.					11766344			29440909	English	Vasc. Health Risk Manage.
134	Prentzas J., Sidiropoulou M.	55993265400;58806756700;	Assessing the Use of Open AI Chat-GPT in a University Department of Education	2023	14th International Conference on Information, Intelligence, Systems and Applications, IISA 2023								10.1109/IISA59645.2023.10345910	https://www.scopus.com/inward/record.uri?eid=2-s2.0-85182023490&doi=10.1109%2fIISA59645.2023.10345910&partnerID=40&md5=ec921258bb55368daddd815ddd8961a6	Democritus University of Thrace, Dept. of Education Sciences in Early Childhood, Alexandroupolis, Greece	Prentzas, J., Democritus University of Thrace, Dept. of Education Sciences in Early Childhood, Alexandroupolis, Greece; Sidiropoulou, M., Democritus University of Thrace, Dept. of Education Sciences in Early Childhood, Alexandroupolis, Greece	ICT tools are often used in education in an effort to provide an added value to teaching, learning, productivity and handling of administrative issues. Artificial Intelligence methods may be integrated in the tools used to enhance their effectiveness. This trend is gaining importance due to the continuous advances in Artificial Intelligence. An Artificial Intelligence tool that has recently gaine…	AI in education; Large language models; Natural language processing; Teacher education; Web-based learning	Artificial intelligence; Computer aided instruction; Education computing; Natural language processing systems; Students; Teaching; AI in education; Department of Education; ICT-tools; Language model; Language processing; Large language model; Natural language processing; Natural languages; Teacher education; Web-based-learning; E-learning																						Abbas, N., Whitfield, J., Atwell, E., Bowman, H., Pickard, T., Walker, A., Online chat and chatbots to enhance mature student engagement in higher education (2022) International Journal of Lifelong Education, 41, pp. 308-326; Antonis, K., Lampsas, P., Prentzas, J., Adult distance learning using a Web-based learning management system: Methodology and results (2007) Advances in Web-Based Learning, …	Sidiropoulou, M.; Democritus University of Thrace, Greece; email: masidiro@psed.duth.gr			Institute of Electrical and Electronics Engineers Inc.	14th International Conference on Information, Intelligence, Systems and Applications, IISA 2023	10 July 2023 through 12 July 2023		195501
135	Rahsepar A.A., Tavakoli N., Kim G.H.J., Hassani C., Abtin F., Bedayat A.	34067787700;57198291892;36699715600;6506835356;16038770900;23003275500;	How AI Responds to Common Lung Cancer Questions: ChatGPT versus Google Bard	2023	Radiology	307	5	e230922				46	10.1148/radiol.230922	https://www.scopus.com/inward/record.uri?eid=2-s2.0-85163901732&doi=10.1148%2fradiol.230922&partnerID=40&md5=e1f306b1f25390cade2ff928068c7228	The Department of Radiological Sciences, Division of Cardiothoracic Imaging, David Geffen School of Medicine at UCLA, 10945 Le Conte Ave, Suite 3371, Los Angeles, CA 90095, United States; Center for Computer Vision and Imaging Biomarkers, Department of Radiological Sciences, David Geffen School of Medicine, UCLA, 10945 Le Conte Ave, Suite 3371, Los Angeles, CA 90095, United States; School of Comp…	Rahsepar, A.A., The Department of Radiological Sciences, Division of Cardiothoracic Imaging, David Geffen School of Medicine at UCLA, 10945 Le Conte Ave, Suite 3371, Los Angeles, CA 90095, United States; Tavakoli, N., School of Computational Science and Engineering, Georgia Institute of Technology, Atlanta, Ga, United States; Kim, G.H.J., Center for Computer Vision and Imaging Biomarkers, Departm…	Background: The recent release of large language models for public use, such as ChatGPT and Google Bard, has opened up a multitude of potential benefits as well as challenges. Purpose: To evaluate and compare the accuracy and consistency of responses generated by publicly available ChatGPT and Google Bard to nonexpert questions related to lung cancer prevention, screening, and terminology commonl…		ablation therapy; Article; artificial intelligence; cancer prevention; cancer risk; cancer screening; clinical feature; computer assisted tomography; controlled study; data accuracy; data consistency; diagnostic test; exposure; family history; genetic screening; health care cost; hospitalization; lung biopsy; lung cancer; lung emphysema; lung fibrosis; lung imaging reporting and data system; lung…			ChatGPT; Google Bard													Brown, T, Mann, B, Ryder, N, Language Models are Few-Shot Learners (2020) Adv Neural Inf Process Syst, 33, pp. 1877-1901; Vaswani, A, Shazeer, N, Parmar, N, Attention is All You Need (2017) Adv Neural Inf Process Syst, 30; Google Bard, , https://bard.google.com; ChatGPT-3.5. OpenAI, , https://openai.com/blog/chatgpt; Ouyang, L, Wu, J, Jiang, X, Training language models to follow instructions with…	Tavakoli, N.; School of Computational Science and Engineering, United States; email: abedayat@mednet.ucla.edu			Radiological Society of North America Inc.					338419		RADLA	37310252	English	Radiology
136	Raimondi R., Tzoumas N., Salisbury T., Di Simplicio S., Romano M.R., Bommireddy T., Chawla H., Chen Y., Connolly S., El Omda S., Gough M., Kishikova L., McNally T., Sadiq S.N., Simpson S., Teh B.L., Toh S., Vohra V., Al-Zubaidy M.	57216556710;57193318523;57873746900;14050900000;35249070500;57151239500;35884494800;57217492897;58243958800;58243468300;57193274722;36802169400;58244278300;57193267014;57915144100;57193337529;57219224342;56402998200;57210697357;	Comparative analysis of large language models in the Royal College of Ophthalmologists fellowship exams	2023	Eye (Basingstoke)	37	17		3530	3533		16	10.1038/s41433-023-02563-3	https://www.scopus.com/inward/record.uri?eid=2-s2.0-85158995373&doi=10.1038%2fs41433-023-02563-3&partnerID=40&md5=ab44c906df2222bda0021cfb2acc08f9	Sunderland Eye Infirmary, Sunderland, United Kingdom; Biosciences Institute, Newcastle University, Newcastle upon Tyne, United Kingdom; Department of Ophthalmology, The James Cook University Hospital, Middlesbrough, United Kingdom; Newcastle Eye Centre, Royal Victoria Infirmary, Newcastle upon Tyne, United Kingdom; Department of Biomedical Science, Humanitas University, Milan, Italy; Cumberland I…	Raimondi, R., Sunderland Eye Infirmary, Sunderland, United Kingdom; Tzoumas, N., Sunderland Eye Infirmary, Sunderland, United Kingdom, Biosciences Institute, Newcastle University, Newcastle upon Tyne, United Kingdom; Salisbury, T., Department of Ophthalmology, The James Cook University Hospital, Middlesbrough, United Kingdom; Di Simplicio, S., Newcastle Eye Centre, Royal Victoria Infirmary, Newca…	[No abstract available]		accuracy; artificial intelligence; artificial intelligence chatbot; clinical decision making; clinical practice; comparative study; curriculum; deep learning; e-learning; human; large language model; medical education; medical examination; multiple choice test; Note; open access; ophthalmologist; ophthalmology; medical education; ophthalmology; Fellowships and Scholarships; Humans; Ophthalmologis…					National Institute for Health and Care Research, NIHR: ACF-2021-01-008	NT is supported by a National Institute for Health and Care Research (NIHR) Academic Clinical Fellowship (ACF-2021-01-008).										Jiang, X., Xie, M., Ma, L., Dong, L., Li, D., International publication trends in the application of artificial intelligence in ophthalmology research: An updated bibliometric analysis (2023) Ann Transl Med, 11, p. 219. , PID: 37007552; Moor, M., Banerjee, O., Abad, Z.S.H., Krumholz, H.M., Leskovec, J., Topol, E.J., Foundation models for generalist medical artificial intelligence (2023) Nature, 6…	Tzoumas, N.; Sunderland Eye InfirmaryUnited Kingdom; email: nik.tzoumas@ncl.ac.uk			Springer Nature					0950222X		EYEEE	37161074	English	Eye
137	Rasul T., Nair S., Kalendra D., Robin M., Santini F.O., Ladeira W.J., Sun M., Day I., Rather R.A., Heathcote L.	57193616909;24332757800;57210913779;57194432947;56684504000;55176768900;58355352000;58355997600;57199227902;35434722500;	The role of ChatGPT in higher education: Benefits, challenges, and future research directions	2023	Journal of Applied Learning and Teaching	6	1		41	56		43	10.37074/jalt.2023.6.1.29	https://www.scopus.com/inward/record.uri?eid=2-s2.0-85162949999&doi=10.37074%2fjalt.2023.6.1.29&partnerID=40&md5=c99d56a6dc7aed575896f231ca95b798	Australian Institute of Business (AIB), Adelaide, Australia; Universidade do Vale do Rio dos Sinos (UNISINOS), Sao Leopoldo, Brazil; Scientific Independent Researcher, Anantnag, J&K, India	Rasul, T., Australian Institute of Business (AIB), Adelaide, Australia; Nair, S., Australian Institute of Business (AIB), Adelaide, Australia; Kalendra, D., Australian Institute of Business (AIB), Adelaide, Australia; Robin, M., Australian Institute of Business (AIB), Adelaide, Australia; Santini, F.O., Universidade do Vale do Rio dos Sinos (UNISINOS), Sao Leopoldo, Brazil; Ladeira, W.J., Univers…	This paper examines the potential benefits and challenges of using the generative AI model, ChatGPT, in higher education, in the backdrop of the constructivist theory of learning. This perspective-type study presents five benefits of ChatGPT: the potential to facilitate adaptive learning, provide personalised feedback, support research and data analysis, offer automated administrative services, a…	Academic integrity; ChatGPT; constructivist theory of learning; generative AI; higher education; Large Language Model (LLM)																	Abbas, N., Whitfield, J., Atwell, E., Bowman, H., Pickard, T., Walker, A., Online chat and chatbots to enhance mature student engagement in higher education (2022) International Journal of Lifelong Education, 41 (3), pp. 308-326. , https://doi.org/10.1080/02601370.2022.2066213; Abdelghani, R., Wang, Y. H., Yuan, X., Wang, T., Sauzéon, H., Oudeyer, P. Y., (2022) GPT-3-driven pedagogical agents for…	Rasul, T.; Australian Institute of Business (AIB)Australia; email: tfrasul@gmail.com			Kaplan Singapore					2591801X				English	J. Appl. Learn. Teach.
138	Rau A., Rau S., Zöller D., Fink A., Tran H., Wilpert C., Nattenmüller J., Neubauer J., Bamberg F., Reisert M., Russe M.F.	57205328239;58132197800;56993195000;58287932900;58288186400;57668763400;56053977500;56063339500;23975531900;12766736500;16314201300;	A Context-based Chatbot Surpasses Radiologists and Generic ChatGPT in Following the ACR Appropriateness Guidelines	2023	Radiology	308	1	e230970				10	10.1148/radiol.230970	https://www.scopus.com/inward/record.uri?eid=2-s2.0-85162019693&doi=10.1148%2fradiol.230970&partnerID=40&md5=b0833e44ccbf1401357e8a269720b519	The Department of Diagnostic and Interventional Radiology, Medical Center–University of Freiburg, Faculty of Medicine, University of Freiburg, Breisacher Str 64, Freiburg, 79106, Germany; Department of Neuroradiology, Medical Center–University of Freiburg, Faculty of Medicine, University of Freiburg, Breisacher Str 64, Freiburg, 79106, Germany; Medical Physics, Department of Diagnostic and Interv…	Rau, A., The Department of Diagnostic and Interventional Radiology, Medical Center–University of Freiburg, Faculty of Medicine, University of Freiburg, Breisacher Str 64, Freiburg, 79106, Germany, Department of Neuroradiology, Medical Center–University of Freiburg, Faculty of Medicine, University of Freiburg, Breisacher Str 64, Freiburg, 79106, Germany; Rau, S., The Department of Diagnostic and I…	Background: Radiologic imaging guidelines are crucial for accurate diagnosis and optimal patient care as they result in standardized decisions and thus reduce inappropriate imaging studies. Purpose: To investigate the potential to support clinical decision-making using an interactive chatbot designed to provide personalized imaging recommendations from American College of Radiology (ACR) appropri…		algorithm; article; artificial intelligence; ChatGPT; cost control; decision making; human; human experiment; knowledge base; practice guideline; radiologist; radiology; clinical decision making; radiologist; software; Algorithms; Clinical Decision-Making; Cost Savings; Humans; Radiologists; Software					Albert-Ludwigs-Universität Freiburg	A.R. supported by Berta-Ottenstein-Programme for Clinician Scientists, Faculty of Medicine, University of Freiburg.										Cascade, PN., Setting appropriateness guidelines for radiology (1994) Radiology, 192 (1), pp. 50A-54A; Gabelloni, M, Di Nasso, M, Morganti, R, Application of the ESR iGuide clinical decision support system to the imaging pathway of patients with hepatocellular carcinoma and cholangiocarcinoma: preliminary findings (2020) Radiol Med (Torino), 125 (6), pp. 531-537; European Society of Radiology (ES…	Russe, M.F.; The Department of Diagnostic and Interventional Radiology, Breisacher Str 64, Germany; email: maximilian.russe@uniklinik-freiburg.de			Radiological Society of North America Inc.					338419		RADLA	37489981	English	Radiology
139	Richards Maldonado L., Abouzied A., Gleason N.W.	58687019700;14832214000;57204069130;	ReaderQuizzer: Augmenting Research Papers with Just-In-Time Learning Questions to Facilitate Deeper Understanding	2023	Proceedings of the ACM Conference on Computer Supported Cooperative Work, CSCW				391	394			10.1145/3584931.3607494	https://www.scopus.com/inward/record.uri?eid=2-s2.0-85176237588&doi=10.1145%2f3584931.3607494&partnerID=40&md5=5e69ed947ec772e53d3fa31b81ca6c87	New York University Abu Dhabi, Abu Dhabi, United Arab Emirates	Richards Maldonado, L., New York University Abu Dhabi, Abu Dhabi, United Arab Emirates; Abouzied, A., New York University Abu Dhabi, Abu Dhabi, United Arab Emirates; Gleason, N.W., New York University Abu Dhabi, Abu Dhabi, United Arab Emirates	Academic reading is a key component of higher education, and serves as a basis for critical thinking, knowledge acquisition and effective communication. Research shows many students struggle with comprehension and analysis tasks with academic texts, despite the central importance of academic reading to success in higher education. Undergraduates and researchers need to internalize dense literatur…	academic papers; augmented reading interfaces; reading comprehension	Education computing; Scaffolds; Academic paper; Augmented reading interface; Critical thinking; Effective communication; High educations; Just-in-time learning; Language model; Power; Reading comprehension; Research papers; Students					Research Institute Centers, New York University Abu Dhabi: CG001	This work was partially supported by the NYUAD Center for Interacting Urban Networks (CITIES), funded by Tamkeen under the NYUAD Research Institute Award CG001.										Ambrose, S.A., Bridges, M.W., Lovett, M.C., DiPietro, M., Norman, M.K., (2010) How Learning Works: Seven Research-Based Principles for Smart Teaching, pp. 188-216. , https://ebookcentral.proquest.com/lib/nyulibrary-ebooks/detail.action.docID=529947#, Wiley, San Francisco, CA; Andrianatos, K., Barriers to reading in higher education: Rethinking reading support (2019) Reading & Writing, 10 (1), p. …		Ames M.Fussell S.Gilbert E.Liao V.Ma X.Page X.Rouncefield M.Singh V.Wisniewski P.	ACM SIGCHI;Google;Rutgers School of Communication and Information;Underwood Institute	Association for Computing Machinery	26th ACM Conference on Computer-Supported Cooperative Work and Social Computing, CSCW 2023	14 October 2023 through 18 October 2023		193793		9798400701290			English	Proc. ACM Conf. Comput. Support. Coop. Work CSCW
140	Riedel M., Kaefinger K., Stuehrenberg A., Ritter V., Amann N., Graf A., Recker F., Klein E., Kiechle M., Riedel F., Meyer B.	57205472856;58784850100;58314905800;58459247000;57219720589;57835458900;57172259900;56533117300;7004338097;57038354200;57385011800;	ChatGPT’s performance in German OB/GYN exams – paving the way for AI-enhanced medical education and clinical practice	2023	Frontiers in Medicine	10		1296615					10.3389/fmed.2023.1296615	https://www.scopus.com/inward/record.uri?eid=2-s2.0-85180912623&doi=10.3389%2ffmed.2023.1296615&partnerID=40&md5=b7369dd79b93776e2a128f0bd6c2bf6b	Department of Gynecology and Obstetrics, Klinikum Rechts der Isar, Technical University Munich (TU), Munich, Germany; Department of Gynecology and Obstetrics, Friedrich–Alexander-University Erlangen–Nuremberg (FAU), Erlangen, Germany; Department of Gynecology and Obstetrics, Bonn University Hospital, Bonn, Germany; Department of Gynecology and Obstetrics, Heidelberg University Hospital, Heidelber…	Riedel, M., Department of Gynecology and Obstetrics, Klinikum Rechts der Isar, Technical University Munich (TU), Munich, Germany; Kaefinger, K., Department of Gynecology and Obstetrics, Klinikum Rechts der Isar, Technical University Munich (TU), Munich, Germany; Stuehrenberg, A., Department of Gynecology and Obstetrics, Klinikum Rechts der Isar, Technical University Munich (TU), Munich, Germany; …	Background: Chat Generative Pre-Trained Transformer (ChatGPT) is an artificial learning and large language model tool developed by OpenAI in 2022. It utilizes deep learning algorithms to process natural language and generate responses, which renders it suitable for conversational interfaces. ChatGPT’s potential to transform medical education and clinical practice is currently being explored, but …	artificial intelligence; ChatGPT; machine learning; medical education; obstetrics and gynecology; students	accuracy; Article; artificial intelligence; ChatGPT; clinical practice; controlled study; data completeness; gynecology; human; Likert scale; medical education; medical student; multiple choice test; obstetrics; qualitative analysis; validation process						The author(s) declare that no financial support was received for the research, authorship, and/or publication of this article.																(2023), https://openai.com/blog/chatgpt/, OpenAI ChatGPT: Optimizing language models for dialogue. :, (Accessed September 17, 2023; Brown, T.B., Mann, B., Ryder, N., Subbiah, M., Kaplan, J., Dhariwal, P., (2020), https://arxiv.org/abs/2005.14165, Language models are few-shot learners. :, (Accessed September 17, 2023; Tamkin, A., Brundage, M., Clark, J., Ganguli, D., (2021), https://arxiv.org/abs/…	Riedel, M.; Department of Gynecology and Obstetrics, Germany; email: maximilian.riedel@mri.tum.de			Frontiers Media SA
141	Rossettini G., Cook C., Palese A., Pillastrini P., Turolla A.	56403252600;58700474600;56227935600;23135475300;23993111600;	Pros and Cons of Using Artificial Intelligence Chatbots for Musculoskeletal Rehabilitation Management	2023	Journal of Orthopaedic and Sports Physical Therapy	53	12		728	734		2	10.2519/jospt.2023.12000	https://www.scopus.com/inward/record.uri?eid=2-s2.0-85177102817&doi=10.2519%2fjospt.2023.12000&partnerID=40&md5=6ffa083dd9b72cf17e36554e34e3ed27	School of Physiotherapy, University of Verona, Verona, Italy; Duke Center for Excellence in Manual and Manipulative Therapy, Duke University, Durham, NC, United States; Doctor of Physical Therapy Program, Duke University, Durham, NC, United States; Department of Orthopaedics, Duke University, Durham, NC, United States; School of Nursing, Department of Medicine (DAME), University of Udine, Udine, …	Rossettini, G., School of Physiotherapy, University of Verona, Verona, Italy; Cook, C., Duke Center for Excellence in Manual and Manipulative Therapy, Duke University, Durham, NC, United States, Doctor of Physical Therapy Program, Duke University, Durham, NC, United States, Department of Orthopaedics, Duke University, Durham, NC, United States; Palese, A., School of Nursing, Department of Medicin…	t SYNOPSIS: Artificial intelligence (AI), specifically large language models (LLMs), which focus on the interaction between computers and human language, can influence musculoskeletal rehabilitation management. AI chatbots (eg, ChatGPT, Microsoft Bing, and Google’s Bard) are a form of large language models designed to understand, interpret, and generate text similar to what is produced by humans.…	artificial intelligence; ChatGPT; clinical reasoning; Google Bard; Microsoft Bing; musculoskeletal pain	artificial intelligence; human; language; Artificial Intelligence; Humans; Language						This Viewpoint received no funding. The authors certify that they have no affiliations with or financial involvement in any organization or entity with a direct financial interest in the subject matter or materials discussed in the article.										Brainard, J., Journals take up arms against AI-written text (2023) Science, 379, pp. 740-741. , https://doi.org/10.1126/science.adh2762; Dave, T, Athaluri, SA, Singh, S., ChatGPT in medicine: an overview of its applications, advantages, limitations, future prospects, and ethical considerations (2023) Front Artif Intell, 6, p. 1169595. , https://doi.org/10.3389/frai.2023.1169595; Else, H., Abstrac…	Rossettini, G.; School of Physiotherapy, (VR), Italy; email: giacomo.rossettini@gmail.com			Movement Science Media					1906011		JOSPD	37707390	English	J. Orthop. Sports Phys. Ther.
142	Rudolph J., Tan S., Tan S.	57474074600;57764872700;58199753600;	War of the chatbots: Bard, Bing Chat, ChatGPT, Ernie and beyond. The new AI gold rush and its impact on higher education	2023	Journal of Applied Learning and Teaching	6	1		364	389		150	10.37074/jalt.2023.6.1.23	https://www.scopus.com/inward/record.uri?eid=2-s2.0-85162822252&doi=10.37074%2fjalt.2023.6.1.23&partnerID=40&md5=82354b12be050b344adee3f5990fb64c	Director of Research, Kaplan, Singapore, Singapore	Rudolph, J., Director of Research, Kaplan, Singapore, Singapore; Tan, S., Director of Research, Kaplan, Singapore, Singapore; Tan, S., Director of Research, Kaplan, Singapore, Singapore	Developments in the chatbot space have been accelerating at breakneck speed since late November 2022. Every day, there appears to be a plethora of news. A war of competitor chatbots is raging amidst an AI arms race and gold rush. These rapid developments impact higher education, as millions of students and academics have started using bots like ChatGPT, Bing Chat, Bard, Ernie and others for a lar…	Artificial intelligence (AI); assessment; Bard; Bing Chat; chatbots in higher education; ChatGPT; conversational agents; Ernie; generative pre-trained transformers (GPT); higher education; large language models (LLMs); learning & teaching																	Adamopoulou, E., Moussiades, L., Chatbots: History, technology, and applications (2020) Machine Learning with Applications, 2, p. 100006; China’s students leap ‘Great Firewall’ to get homework help from ChatGPT (2023) Business Times, p. 17. , (March 9); Ali, J. K. M., Shamsan, M. A. A., Hezam, T. A., Mohammed, A. A., Impact of ChatGPT on learning motivation: Teachers and students’ voices (2023) J…
143	Sallam M., Salim N.A., Barakat M., Al-Mahzoum K., Al-Tammemi A.B., Malaeb D., Hallit R., Hallit S.	58031424100;55100814300;57216549396;57221541849;57216892163;56117492000;37101532600;37101759800;	Assessing Health Students' Attitudes and Usage of ChatGPT in Jordan: Validation Study	2023	JMIR Medical Education	9	1	e48254				14	10.2196/48254	https://www.scopus.com/inward/record.uri?eid=2-s2.0-85173941987&doi=10.2196%2f48254&partnerID=40&md5=b23c3811c3e4728438d3aece352d1138	Department of Pathology, Microbiology and Forensic Medicine, School of Medicine, The University of Jordan, Amman, Jordan; Department of Clinical Laboratories and Forensic Medicine, Jordan University Hospital, Amman, Jordan; Prosthodontic Department, School of Dentistry, The University of Jordan, Amman, Jordan; Prosthodontic Department, Jordan University Hospital, Amman, Jordan; Department of Clin…	Sallam, M., Department of Pathology, Microbiology and Forensic Medicine, School of Medicine, The University of Jordan, Amman, Jordan, Department of Clinical Laboratories and Forensic Medicine, Jordan University Hospital, Amman, Jordan; Salim, N.A., Prosthodontic Department, School of Dentistry, The University of Jordan, Amman, Jordan, Prosthodontic Department, Jordan University Hospital, Amman, J…	Background: ChatGPT is a conversational large language model that has the potential to revolutionize knowledge acquisition. However, the impact of this technology on the quality of education is still unknown considering the risks and concerns surrounding ChatGPT use. Therefore, it is necessary to assess the usability and acceptability of this promising tool. As an innovative technology, the inten…	artificial intelligence; education; healthcare; KAP; knowledge; machine learning; opinion; practices; survey; technology							We are deeply grateful to the students who participated in this study.																de Divitiis, E, Cappabianca, P, de Divitiis, O., The "schola medica salernitana": the forerunner of the modern university medical schools (2004) Neurosurgery, 55 (4), pp. 722-744. , Oct; -44; discussion [doi] [Medline: 15458581]; Dornan T., Dornan T., Osler, Flexner, apprenticeship and 'the new medical education' (2005) J R Soc Med, 98 (3), pp. 91-95. , Mar; [FREE Full text] [doi] [Medline: 15738…	Sallam, M.; Department of Pathology, Queen Rania Al-Abdullah Street-Aljubeiha, Jordan; email: malik.sallam@ju.edu.jo			JMIR Publications Inc.
144	Savelka J., Agarwal A., An M., Bogart C., Sakr M.	54783405100;58155030600;57209644538;25649133400;57337410100;	Thrilled by Your Progress! Large Language Models (GPT-4) No Longer Struggle to Pass Assessments in Higher Education Programming Courses	2023	ICER 2023 - Proceedings of the 2023 ACM Conference on International Computing Education Research V.1				78	92		10	10.1145/3568813.3600142	https://www.scopus.com/inward/record.uri?eid=2-s2.0-85169462375&doi=10.1145%2f3568813.3600142&partnerID=40&md5=a22f2eaaae3e1c62d039bc28390d525a	Carnegie Mellon University, Pittsburgh, PA, United States	Savelka, J., Carnegie Mellon University, Pittsburgh, PA, United States; Agarwal, A., Carnegie Mellon University, Pittsburgh, PA, United States; An, M., Carnegie Mellon University, Pittsburgh, PA, United States; Bogart, C., Carnegie Mellon University, Pittsburgh, PA, United States; Sakr, M., Carnegie Mellon University, Pittsburgh, PA, United States	This paper studies recent developments in large language models' (LLM) abilities to pass assessments in introductory and intermediate Python programming courses at the postsecondary level. The emergence of ChatGPT resulted in heated debates of its potential uses (e.g., exercise generation, code explanation) as well as misuses in programming classes (e.g., cheating). Recent studies show that while…	AI code generation; AlphaCode; ChatGPT; Codex; coding exercises; generative pre-trained transformers; GitHub Copilot; GPT; introductory and intermediate programming; MCQ; Multiple-choice question answering; programming knowledge assessment; Python course	Computational linguistics; Curricula; Education computing; Engineering education; High level languages; AI code generation; Alphacode; ChatGPT; Codegeneration; Codex; Coding exercise; Generative pre-trained transformer; Github copilot; GPT; Introductory and intermediate programming; Knowledge assessment; MCQ; Multiple-choice question answering; Multiple-choice questions; Programming knowledge; Pr…																Becker, B.A., Denny, P., Finnie-Ansley, J., Luxton-Reilly, A., Prather, J., Antonio Santos, E., (2022) Programming Is Hard-Or at Least It Used to Be: Educational Opportunities And Challenges of AI Code Generation, , 2022; Bommarito, J., Bommarito, M., Martin Katz, D., Katz, J., (2023) GPT as Knowledge Worker: A Zero-Shot Evaluation of (AI) CPA Capabilities, , 2023; Bommarito, I.I.M., Martin Katz,…			ACM Special Interest Group on Computer Science Education (SIGCSE)	Association for Computing Machinery, Inc	19th Annual ACM International Computing Education Research Conference, ICER 2023	7 August 2023 through 11 August 2023		192875		9781450399760			English	ICER - Proc. ACM Conf. Int. Comput. Educ. Res. V.1
145	Shah D., Speyer G., Yalim J.	58464986600;6603330539;57190670856;	Centralized provisioning of large language models for a research community	2023	ACM International Conference Proceeding Series				704	707			10.1145/3624062.3624147	https://www.scopus.com/inward/record.uri?eid=2-s2.0-85178143571&doi=10.1145%2f3624062.3624147&partnerID=40&md5=80d6f5aedf8eec76d08c0299f189674d	Arizona State University, Tempe, AZ, United States	Shah, D., Arizona State University, Tempe, AZ, United States; Speyer, G., Arizona State University, Tempe, AZ, United States; Yalim, J., Arizona State University, Tempe, AZ, United States	Local support for large language models (LLMs) in a research community can address unique technological and procedural challenges that arise in an academic setting. Platforms providing multi-GPU nodes, typically found in a centralized computational resource, such as a university datacenter, can manage the large memory footprint of the open-source LLMs. Customizations employing peripheral framewor…	HPC; large language models; LLMs; ML/AI; open-source; provisioning; Software engineering	Air navigation; Computational linguistics; Open systems; Centralised; HPC; Language model; Large language model; ML/AI; Open-source; Provisioning; Research communities; Open source software																Falcon-40B: An open large language model with state-of-the-art performance (2023) Technical Report; Abid, A., Abdalla, A., Abid, A., Khan, D., Alfozan, A., Zou, J., (2019) Gradio: Hassle-Free Sharing and Testing of ML Models in the Wild, , https://doi.org/10.48550/arXiv.1906.02569; (2023) Sol, , https://github.com/jackfrost1411/HUST23-SC23-LLMs, ASU. https: //github. com/jackfrost1411/HUST23-SC23…			ACM's Special Interest Group on High Performance Computing (SIGHPC);Association for Computing Machinery;IEEE�s Technical Committee on High Performance Computing (TCHPC);Institute of Electrical and Electronics Engineers (IEEE) Computer Society	Association for Computing Machinery	2023 International Conference on High Performance Computing, Network, Storage, and Analysis, SC Workshops 2023	12 November 2023 through 17 November 2023		194341		9798400707858			English	ACM Int. Conf. Proc. Ser.
146	Siragusa I., Pirrone R.	58636100700;6603614874;	Conditioning Chat-GPT for Information Retrieval: The Unipa-GPT Case Study	2023	CEUR Workshop Proceedings	3551								https://www.scopus.com/inward/record.uri?eid=2-s2.0-85178352259&partnerID=40&md5=1d1354231fe569785be2e7e9a9a6203a	Dipartimento di Ingegneria, Università Degli Studi di Palermo, Viale delle Scienze, Edificio 6, Palermo, 90128, Italy	Siragusa, I., Dipartimento di Ingegneria, Università Degli Studi di Palermo, Viale delle Scienze, Edificio 6, Palermo, 90128, Italy; Pirrone, R., Dipartimento di Ingegneria, Università Degli Studi di Palermo, Viale delle Scienze, Edificio 6, Palermo, 90128, Italy	This paper illustrates the architecture and training of Unipa-GPT, a Large Language Model based chatbot developed for assisting students in choosing a bachelor/master degree course at the University of Palermo. Unipa-GPT relies on gpt-3.5-turbo, it was presented in the context of the European Researchers' Night SHARPER event. In our experiments we adopted both the Retrieval Augmented Generation (…	ChatGPT; Fine-tuning; Large Language Model; RAG	Case-studies; Chatbots; ChatGPT; Fine tuning; Language model; Large language model; Master degree; Model-based OPC; Retrieval augmented generation; University of Palermo; Computational linguistics						We thank all the CHILab team, in particular Dr. Salvatore Contino and PhD students Luca Cruciata, Gaetano Pottino and Paolo Sortino, that contributed in generating the corpus with the scraping and implemented the demonstration interface. This work is supported by the PO FESR 2014-2020 grant n. 086201000543, “SCuSi - Smart Culture in Sicily”.																Bassignana, E., Brunato, D., Polignano, M., Ramponi, A., Preface to the Seventh Workshop on Natural Language for Artificial Intelligence (NL4AI 2023) (2023) CEUR Workshop Proceedings, 3551; Dwivedi, Y. K., Kshetri, N., Hughes, L., Slade, E. L., Jeyaraj, A., Kar, A. K., Baabdullah, A. M., Ahuja, M., so what if chatgpt wrote it?" multidisciplinary perspectives on opportunities, challenges and impli…	Siragusa, I.; Dipartimento di Ingegneria, Viale delle Scienze, Edificio 6, Italy; email: irene.siragusa02@unipa.it	Bassignana E.Brunato D.Polignano M.Ramponi A.		CEUR-WS	7th Workshop on Natural Language for Artificial Intelligence, NL4AI 2023	6 November 2023 through 7 November 2023		194401
147	Šlapeta J.	7004158093;	Are ChatGPT and other pretrained language models good parasitologists?	2023	Trends in Parasitology	39	5		314	316		12	10.1016/j.pt.2023.02.006	https://www.scopus.com/inward/record.uri?eid=2-s2.0-85149762038&doi=10.1016%2fj.pt.2023.02.006&partnerID=40&md5=5a5efe0470ff226b8b7c56acd943e7bf	Sydney School of Veterinary Science, Faculty of Science, The University of Sydney, Sydney, NSW 2006, Australia; The University of Sydney Institute for Infectious Diseases, University of Sydney, Sydney, NSW 2006, Australia	Šlapeta, J., Sydney School of Veterinary Science, Faculty of Science, The University of Sydney, Sydney, NSW 2006, Australia, The University of Sydney Institute for Infectious Diseases, University of Sydney, Sydney, NSW 2006, Australia	Large language models, such as ChatGPT, will have far-reaching impacts on parasitology, including on students. Authentic experiences gained during students’ training are absent from these models. This is not a weakness of the models but rather an opportunity benefiting parasitology at large. © 2023 Elsevier Ltd	artificial intelligence; education; examination; generative pretrained transformer; study	artificial intelligence; college student; Echinococcus granulosus; educational model; human; medical education; medical student; nonhuman; Note; parasitology; language; Humans; Language						Discussion with group members at the University of Sydney and Nichola Calvani on concept and earlier drafts are greatly appreciated. The author declares no competing interests.										Ji, Z., Survey of hallucination in natural language generation (2022) ACM Comput. Surv.; Jenkins, D.J., Macpherson, C.N., Transmission ecology of Echinococcus in wild-life in Australia and Africa (2003) Parasitology, 127, pp. S63-S72; Thompson, R.C., Observations on the development of Echinococcus multilocularis in cats (2003) J. Parasitol., 89, pp. 1086-1088; Luo, R., BioGPT: generative pre-trai…	Šlapeta, J.; Sydney School of Veterinary Science, Australia; email: jan.slapeta@sydney.edu.au			Elsevier Ltd					14714922		TPRAC	36872153	English	Trends Parasitol.
148	Slater A.	56081833900;	Post-Automation Poetics; or, How Cold-War Computers Discovered Poetry	2023	American Literature	95	2		205	227			10.1215/00029831-10575035	https://www.scopus.com/inward/record.uri?eid=2-s2.0-85164781783&doi=10.1215%2f00029831-10575035&partnerID=40&md5=9927a03759a4f6e0dec4184a08838933		Slater, A.	This article examines early Cold War attempts to generate poetry using computers. Set between the end of World War II and the rise of personal computing, computer-generated poetry from this period was shaped not only by artists but also the university lab, the defensecontactor, and the corporation. Computer-generated poetry from this era often participated in the larger project of fostering publi…	Artificial intelligence (AI); automation; Cold War poetry; computer poetry; poetry and poetics																	Poetry, Prose, and the Machine (1962) Freeing the Mind: Articles and Letters from “The Times Literary Supplement,” during March-June 1962, pp. 45-49. , London: Times Publishing; Bachleitner, Norbert, The Virtual Muse: Forms and Theory of Poetry (2005) Theory into Poetry: New Approaches to the Lyric, pp. 303-344. , edited by Eva Müller-Zettelmann and Margarete Rubik, Amsterdam: Rodopi Press; Baile…				Duke University Press					29831				English	Am. Lit.
149	Solopova V., Rostom E., Cremer F., Gruszczynski A., Witte S., Zhang C., López F.R., Plößl L., Hofmann F., Romeike R., Gläser-Zikuda M., Benzmüller C., Landgraf T.	57322485000;58515217700;58513869100;58515446300;58514093500;58515217800;58515217900;58514093600;57211375939;24475498800;23979664700;6507389221;25929319000;	PapagAI: Automated Feedback for Reflective Essays	2023	Lecture Notes in Computer Science (including subseries Lecture Notes in Artificial Intelligence and Lecture Notes in Bioinformatics)	14236 LNAI			198	206		1	10.1007/978-3-031-42608-7_16	https://www.scopus.com/inward/record.uri?eid=2-s2.0-85174443259&doi=10.1007%2f978-3-031-42608-7_16&partnerID=40&md5=9a39e88919e9c9a0aa4554dbd75735f8	Freie Universität Berlin, Berlin, Germany; Friedrich-Alexander-Universität Erlangen-Nürnberg, Erlangen, Germany; Otto-Friedrich-Universität Bamberg, Bamberg, Germany	Solopova, V., Freie Universität Berlin, Berlin, Germany; Rostom, E., Freie Universität Berlin, Berlin, Germany; Cremer, F., Freie Universität Berlin, Berlin, Germany; Gruszczynski, A., Freie Universität Berlin, Berlin, Germany; Witte, S., Freie Universität Berlin, Berlin, Germany; Zhang, C., Friedrich-Alexander-Universität Erlangen-Nürnberg, Erlangen, Germany; López, F.R., Freie Universität Berli…	Written reflective practice is a regular exercise pre-service teachers perform during their higher education. Usually, their lecturers are expected to provide individual feedback, which can be a challenging task to perform on a regular basis. In this paper, we present the first open-source automated feedback tool based on didactic theory and implemented as a hybrid AI system. We describe the comp…	Automated feedback; Dialogue; Hybrid AI; NLP	Artificial intelligence; Computational linguistics; Education computing; Open systems; AI systems; Automated feedback; Dialog; Feedback tool; High educations; Hybrid AI; Language model; Open-source; Preservice teachers; Reflective practise; Automation					Defence Research and Development Canada, DRDC; Bundesministerium für Wirtschaft und Klimaschutz, BMWK; National Research Council Canada, NRC; Helmholtz-Gemeinschaft, HGF; Deutsche Forschungsgemeinschaft, DFG: 390893796, EXC 2176; Bundesministerium für Bildung und Forschung, BMBF: FKZ FKZ16KIS1700; Fraunhofer-Gesellschaft, Fraunhofer: 887500, 891793; Helmholtz Association	Acknowledgements. We acknowledge financial support by Technologieallianz Ober-franken (TAO) and thank the anonymous reviewers for their feedback.	Acknowledgment. The research was partly funded by the Deutsche Forschungsge-meinschaft (DFG, German Research Foundation) under Germany’s Excellence Strategy – EXC 2176 “Understanding Written Artefacts: Material, Interaction and Transmission in Manuscript Cultures”, project no. 390893796. The research was conducted within the scope of the Centre for the Study of Manuscript Cultures (CSMC) at Unive…	Acknowledgements. This research has been supported by the Austrian Federal Ministry for Climate Action, Environment, Energy, Mobility, Innovation and Technology (BMK), the German Federal Ministry for Economic Affairs and Climate Action (BMWK) and the Fraunhofer-Gesellschaft through the projects REINFORCE (887500), champI4.0ns (891793) and MES.Trix.	Acknowledgements. This work was supported by the BMWK	Acknowledgement. The authors gratefully acknowledge funding from the German	This project is supported by the National Research Council Canada (NRC) and the Defence Research and Development Canada (DRDC).											Batbaatar, E., Li, M., Ryu, K.H., Semantic-emotion neural network for emotion recognition from text (2019) IEEE Access, 7, pp. 111866-111878. , https://doi.org/10.1109/ACCESS.2019.2934529; Becker, A., (2021) 83 Prozent Der Studenten Brechen Lehramts-Studium Ab, , Nordkurier; Bird, S., Klein, E., Loper, E., (2009) Natural Language Processing with Python: Analyzing Text with the Natural Language To…	Solopova, V.; Freie Universität BerlinGermany; email: veronika.solopova@fu-berlin.de	Seipel D.Steen A.		Springer Science and Business Media Deutschland GmbH	46th German Conference on Artificial Intelligence, KI 2023	26 September 2023 through 29 September 2023		301619
150	Sonkar S., Mallick D.B., Liu N., Baraniuk R.G.	57219741166;57188562617;57224097072;35580714600;	CLASS: A Design Framework for Building Intelligent Tutoring Systems Based on Learning Science Principles	2023	Findings of the Association for Computational Linguistics: EMNLP 2023				1941	1961		1		https://www.scopus.com/inward/record.uri?eid=2-s2.0-85183294093&partnerID=40&md5=df998fc2a710ba258ffded662f041fb2	Rice University, United States; OpenStax, Rice University, United States	Sonkar, S., Rice University, United States; Mallick, D.B., OpenStax, Rice University, United States; Liu, N., Rice University, United States; Baraniuk, R.G., Rice University, United States	We present a design framework called Conversational Learning with Analytical Step-by-Step Strategies (CLASS) for building advanced Intelligent Tutoring Systems (ITS) powered by high-performance Large Language Models (LLMs). The CLASS framework empowers ITS with two key capabilities. First, through a carefully curated scaffolding dataset, CLASS equips ITS with essential problem-solving strategies,…		Architectural design; Computational linguistics; Computer aided instruction; Decision making; Education computing; Intelligent vehicle highway systems; Learning systems; Problem solving; Scaffolds; Conversational learning; Design frameworks; Essential problems; Intelligent tutoring; Language model; Learning science; Performance; Problem-solving; Step-by-step strategy; Tutoring system; Students					N00014-18-1-2047; National Science Foundation, NSF: 1842378; Office of Naval Research, ONR: N0014-20-1-2534; Air Force Office of Scientific Research, AFOSR: FA9550-22-1-0060	This work was supported by NSF grants 1842378, ONR grant N0014-20-1-2534, AFOSR grant FA9550-22-1-0060, and a Vannevar Bush Faculty Fellowship, ONR grant N00014-18-1-2047.										Abid, Abubakar, Abdalla, Ali, Abid, Ali, Khan, Dawood, Alfozan, Abdulrahman, Zou, James, (2019) Gradio: Hassle-Free Sharing and Testing of ML Models in the Wild, , arXiv preprint arXiv:1906.02569; Anderson, John R, Corbett, Albert T, Koedinger, Kenneth R, Pelletier, Ray, Cognitive tutors: Lessons learned (1995) The journal of the learning sciences, 4 (2), pp. 167-207; Bannert, Maria, Effekte meta…			Apple;Colossal-AI;et al.;Google Research;GTCOM;King Salman Global Academy for Arabic Language	Association for Computational Linguistics (ACL)	2023 Findings of the Association for Computational Linguistics: EMNLP 2023	6 December 2023 through 10 December 2023		196127		9798891760615			English	Find. Assoc. Comput. Linguist.: EMNLP
151	Sridhar P., Doyle A., Agarwal A., Bogart C., Savelka J., Sakr M.	58500370900;58499616700;58155030600;25649133400;54783405100;57337410100;	Harnessing LLMs in Curricular Design: Using GPT-4 to Support Authoring of Learning Objectives	2023	CEUR Workshop Proceedings	3487			139	150		1		https://www.scopus.com/inward/record.uri?eid=2-s2.0-85166922012&partnerID=40&md5=f1a3b3aa6d8a91309667777ccb3aa97e	Language Technology Institute, Carnegie Mellon University, Pittsburgh, PA, United States; Computer Science Department, Carnegie Mellon University, Pittsburgh, PA, United States	Sridhar, P., Language Technology Institute, Carnegie Mellon University, Pittsburgh, PA, United States; Doyle, A., Language Technology Institute, Carnegie Mellon University, Pittsburgh, PA, United States; Agarwal, A., Computer Science Department, Carnegie Mellon University, Pittsburgh, PA, United States; Bogart, C., Computer Science Department, Carnegie Mellon University, Pittsburgh, PA, United St…	We evaluated the capability of a generative pre-trained transformer (GPT-4) to automatically generate high-quality learning objectives (LOs) in the context of a practically oriented university course on Artificial Intelligence. Discussions of opportunities (e.g., content generation, explanation) and risks (e.g., cheating) of this emerging technology in education have intensified, but to date ther…	Automated Content Generation; Automatic Generation; Course Design Automation; Curricular Development; GPT-4; Large Language Models; Learning Objectives; LLMs	Artificial intelligence; Blooms (metal); Computer aided design; Curricula; Education computing; Learning systems; Taxonomies; Automated content generation; Automatic Generation; Course design; Course design automation; Curricular development; Design automations; GPT-4; Language model; Large language model; Learning objectives; LLM; Quality control																						Bloom, B. S., Engelhart, M. D., Furst, E., Hill, W. H., Krathwohl, D. R., (1956) Handbook i: cognitive domain, , New York: David McKay; Krathwohl, D. R., A revision of bloom's taxonomy: An overview (2002) Theory into practice, 41, pp. 212-218; Adams, N. E., Bloom's taxonomy of cognitive learning objectives (2015) Journal of the Medical Library Association: JMLA, 103 (3), pp. 152-153; Tran, K. N.,…	Sridhar, P.; Language Technology Institute, United States; email: pragnyas@andrew.cmu.edu Doyle, A.; Language Technology Institute, United States; email: adoyle@andrew.cmu.edu	Moore S.Stamper J.Tong R.Cao C.Liu Z.Hu X.Lu Y.Liang J.Khosravi H.Denny P.Singh A.Brooks C.		CEUR-WS	1st Annual Workshop on Empowering Education with LLMs - the Next-Gen Interface and Content Generation, AIEDLLM 2023	7 July 2023		192705
152	Sugiyama K., Yamanaka T.	57219715392;57217277789;	Proposals and Methods for Foreign Language Learning Using Machine Translation and Large Language Model	2023	Procedia Computer Science	225			4750	4757			10.1016/j.procs.2023.10.474	https://www.scopus.com/inward/record.uri?eid=2-s2.0-85183548420&doi=10.1016%2fj.procs.2023.10.474&partnerID=40&md5=3c47ddc0157dcc4b50d24d08abc8aecd	Graduate School of Science and Engineering, Ritsumeikan Univercity, 1-1-1 Noji-higashi, Shiga, Kusatsu, 525-8577, Japan; College of Life Sciences, Ritsumeikan Univercity, 1-1-1 Noji-higashi, Shiga, Kusatsu, 525-8577, Japan	Sugiyama, K., Graduate School of Science and Engineering, Ritsumeikan Univercity, 1-1-1 Noji-higashi, Shiga, Kusatsu, 525-8577, Japan; Yamanaka, T., College of Life Sciences, Ritsumeikan Univercity, 1-1-1 Noji-higashi, Shiga, Kusatsu, 525-8577, Japan	In this paper, we propose a new learning model that utilizes machine translation and large language models. While English education has traditionally been conducted through the relationship between English teachers and learners, replacing English teachers with machine translation and large language models may offer the potential to provide an equally or even more efficient and high-quality learni…	English language learning; Foreign language teaching; Large language model; Machine Translation																	(2022) EF EPI EF English Proficiency Index, , https://www.ef.com/epi; Steele, D., Zhang, R., Enhancement of Teacher Training: Key to Improvement of English Education in Japan (2016) Social and Behavioral Sciences, 217, pp. 16-25; Aizawa, I., Rose, H., An analysis of Japan's English as medium of instruction initiatives within higher education: the gap between meso-level policy and micro-level prac…	Sugiyama, K.; Graduate School of Science and Engineering, 1-1-1 Noji-higashi, Shiga, Japan; email: re0059hs@ed.ritsumei.ac.jp Yamanaka, T.; College of Life Sciences, 1-1-1 Noji-higashi, Shiga, Japan; email: yaman@fc.ritsumei.ac.jp	Howlett R.Tsihrintzis G.A.Toro C.Rios S.A.Jain L.C.		Elsevier B.V.	27th International Conference on Knowledge Based and Intelligent Information and Engineering Sytems, KES 2023	6 September 2023 through 8 September 2023		196245	18770509				English	Procedia Comput. Sci.
153	Sunarti T.	57201671106;	Effectiveness of literacy learning model to improve skills of scientific literacy learning plan for physics teacher candidates	2019	Journal of Physics: Conference Series	1171	1	12004				1	10.1088/1742-6596/1171/1/012004	https://www.scopus.com/inward/record.uri?eid=2-s2.0-85063091495&doi=10.1088%2f1742-6596%2f1171%2f1%2f012004&partnerID=40&md5=34af864d0326ed7d1b9179b28ab28508	Department of Physics, Faculty of Mathematics and Natural Sciences, Universitas Negeri Surabaya, Kampus Unesa Ketintang, Surabaya, 60231, Indonesia	Sunarti, T., Department of Physics, Faculty of Mathematics and Natural Sciences, Universitas Negeri Surabaya, Kampus Unesa Ketintang, Surabaya, 60231, Indonesia	The professionalism development of physics teacher candidates has been emphasized in their scientific literacy skills; so Skills of Scientific Literacy Learning Plan (SSLLP) is often ignored. Therefore, the purpose of this study was to analyze the effectiveness of the Literacy Learning Model (LLM) to improve the SSLLP for physics teacher candidates. This research used one group pre-test and post-…		Gain values; Literacy learning; Physics learning; Post test; Scientific literacy; T-tests; Physics					Kementerian Riset Teknologi Dan Pendidikan Tinggi Republik Indonesia: 0001.82 / UN38.11-P/LT/2017	The author’s gratitude goes to the Ministry of Research, Technology and Higher Education who has funded the Research (SK Number: 0001.82 / UN38.11-P/LT/2017 dated 06 December 2016). Likewise, the author's gratitude goes to Surabaya State University and Lambung Mangkurat University that have provided research opportunities.										Sunarti, T., Prahani, B.K., Wasis, Madlazim, (2018) South Afric. J. Educ. Accepted; Liakopoulou, M., (2011) Inter. J. Hum. Soc. Sci., 1, p. 66; Loughran, J., (2014) J. Teach. Educ, pp. 1-13. , http://jte.Sagepub.com/content/early/2014/04/28/; Tanang, H., Abu, B., (2014) J. Cur. Teach., 3, p. 25; Udompong, L., Traiwicitkhun, D., Wongwanich, S., (2014) Proc-Sos & Behav. Sci., 116, p. 1581; Sunarti,…	Sunarti, T.; Department of Physics, Indonesia; email: titinsunarti@unesa.ac.id		Universitas Negeri Surabaya (UNESA)	Institute of Physics Publishing	Seminar Nasional Fisika: Earthing Physics and Learning Physics in Building Global Wisdom, SNF 2018	11 August 2018 through 11 August 2018		145895	17426588				English	J. Phys. Conf. Ser.
154	Taju S.W., Ferry Mandias G., Moedjahedy J.H., Kusuma Wahyudi A., Rotikan R., Putra E.Y.	57193140038;58813072200;57211551601;58813160700;57210460851;57192379966;	AI-powered Chatbot for Information Service at Klabat University by Integrating OpenAI GPT-3 with Intent Recognition and Semantic Search	2023	2023 5th International Conference on Cybernetics and Intelligent Systems, ICORIS 2023								10.1109/ICORIS60118.2023.10352259	https://www.scopus.com/inward/record.uri?eid=2-s2.0-85182404718&doi=10.1109%2fICORIS60118.2023.10352259&partnerID=40&md5=9c5cfa8efe4bbd730159ce6bb4d39c89	Klabat University, Department of Computer Science, Manado, Indonesia	Taju, S.W., Klabat University, Department of Computer Science, Manado, Indonesia; Ferry Mandias, G., Klabat University, Department of Computer Science, Manado, Indonesia; Moedjahedy, J.H., Klabat University, Department of Computer Science, Manado, Indonesia; Kusuma Wahyudi, A., Klabat University, Department of Computer Science, Manado, Indonesia; Rotikan, R., Klabat University, Department of Comp…	The rapid advancement of Artificial Intelligence (AI) in recent years has transformed numerous sectors, including information services. This study introduces Unklabot 1.0, an innovative AI-powered chatbot specially designed and proposed for information services at Klabat university. Unklabot 1.0 was developed to take advantage of an advanced large language model (LLM), namely OpenAI GPT-3 (text-d…	artificial intelligence; chatbot; chroma database; intent recognition; large language model; machine learning; openai gpt; semantic search; unklabot	Character recognition; Computational linguistics; Information services; Knowledge based systems; Learning systems; Machine learning; Natural language processing systems; Semantic Web; Chatbots; Chroma database; Intent recognition; Knowledge based; Language model; Large language model; Machine-learning; Openai gpt; Semantic search; Unklabot; Semantics						ACKNOWLEDGMENT This work is supported with good condition and funded by the Computer Science Faculty at Klabat University.																Ventayen, R.J.M., (2023) OpenAI ChatGPT generated results: Similarity index of artificial intelligence-based contents, , Available at SSRN 4332664; Touvron, H., (2023) Llama: Open and efficient foundation language models; Sun, Y., (2021) Ernie 3. 0: Large-scale knowledge enhanced pre-training for language understanding and generation; Ram, B., Pratima Verma, P.V., Artificial intelligence AI-based…	Taju, S.W.; Klabat University, Indonesia; email: semmy@unklab.ac.id			Institute of Electrical and Electronics Engineers Inc.	5th International Conference on Cybernetics and Intelligent Systems, ICORIS 2023	6 October 2023 through 7 October 2023		195656
155	Tan C.W., Lim K.Y.	58769187100;57194266032;	Revolutionizing Formative Assessment in STEM Fields: Leveraging AI and NLP Techniques	2023	2023 Asia Pacific Signal and Information Processing Association Annual Summit and Conference, APSIPA ASC 2023				1357	1364			10.1109/APSIPAASC58517.2023.10317226	https://www.scopus.com/inward/record.uri?eid=2-s2.0-85180008567&doi=10.1109%2fAPSIPAASC58517.2023.10317226&partnerID=40&md5=32dcc788bf2a22422f36f6fbbbccbba0	Faculty of Computing and Information Technology, Tunku Abdul Rahman University of Management and Technology, Setapak, Kuala Lumpur, 53300, Malaysia; Department of Computing and Information Technology, Tunku Abdul Rahman University of Management and Technology, Penang, Malaysia	Tan, C.W., Faculty of Computing and Information Technology, Tunku Abdul Rahman University of Management and Technology, Setapak, Kuala Lumpur, 53300, Malaysia; Lim, K.Y., Department of Computing and Information Technology, Tunku Abdul Rahman University of Management and Technology, Penang, Malaysia	Artificial intelligence (AI) has been extensively studied in science, technology, engineering, and mathematics (STEM), but there is a disparity between AI-generated and human-written scientific content. To bridge this gap, a prototype utilizing Natural Language Processing (NLP) techniques and a large language model (LLM) generates assessment questions and evaluates student answers. This formative…		Benchmarking; Education computing; Engineering education; Natural language processing systems; Assessment system; Engineering and mathematics; Engineering fields; Formative assessment; Language processing techniques; Mathematic fields; Natural languages; Science technologies; Scientific content; Technology fields; Students																						Razzaq, L., The Assistment project: Blending assessment and assisting (2005) Proceedings of the 12th Annual Conference on Artificial Intelligence in Education; Koedinger, K.R., Anderson, J.R., Illustrating Principled Design: The Early Evolution of a Cognitive Tutor for Algebra Symbolization (1998) Interactive Learning Environments, 5 (1), pp. 161-179. , Mar; Figueiredo, J., García-Peñalvo, F.J., …	Tan, C.W.; Faculty of Computing and Information Technology, Setapak, Malaysia; email: chiwee@tarc.edu.my			Institute of Electrical and Electronics Engineers Inc.	2023 Asia Pacific Signal and Information Processing Association Annual Summit and Conference, APSIPA ASC 2023	31 October 2023 through 3 November 2023		194597
156	Tavares C., Oliveira L., Duarte P., da Silva M.M.	57361620600;57193072753;58533248600;57905129300;	Artificial Intelligence: A Blessing or a Threat for Language Service Providers in Portugal	2023	Informatics	10	4	81				1	10.3390/informatics10040081	https://www.scopus.com/inward/record.uri?eid=2-s2.0-85180659093&doi=10.3390%2finformatics10040081&partnerID=40&md5=1bf0896fe4f9ba3feafe7cc3f7602f8e	CEOS.PP, ISCAP Polytechnic of Porto, Porto, 4465-004, Portugal	Tavares, C., CEOS.PP, ISCAP Polytechnic of Porto, Porto, 4465-004, Portugal; Oliveira, L., CEOS.PP, ISCAP Polytechnic of Porto, Porto, 4465-004, Portugal; Duarte, P., CEOS.PP, ISCAP Polytechnic of Porto, Porto, 4465-004, Portugal; da Silva, M.M., CEOS.PP, ISCAP Polytechnic of Porto, Porto, 4465-004, Portugal	According to a recent study by OpenAI, Open Research, and the University of Pennsylvania, large language models (LLMs) based on artificial intelligence (AI), such as generative pretrained transformers (GPTs), may have potential implications for the job market, specifically regarding occupations that demand writing or programming skills. This research points out that interpreters and translators a…	artificial intelligence; interpreters; language service providers; large language models; neural machine translation; translators						Fundação para a Ciência e a Tecnologia, FCT: UIDB/05422/2020	This work is financed by Portuguese national funds through FCT—Fundação para a Ciência e Tecnologia, under project UIDB/05422/2020.										https://www.mckinsey.com/capabilities/quantumblack/our-insights/the-state-of-ai-in-2022-and-a-half-decade-in-review, Available online; Eloundou, T., Manning, S., Mishkin, P., Rock, D., GPTs Are GPTs: An Early Look at the Labor Market Impact Potential of Large Language Models (2023) arXiv, , 2303.10130; https://www.factmr.com/report/language-services-market, Available online; Bowker, L., Fit-for-P…	Oliveira, L.; CEOS.PP, Portugal; email: lgo@eu.ipp.pt			Multidisciplinary Digital Publishing Institute (MDPI)					22279709				English	Informatics
157	Thida M.	24829932800;	Automated Analysis of Job Market Demands using Large Language Model	2023	International Journal of Advanced Computer Science and Applications	14	8		937	946			10.14569/IJACSA.2023.01408103	https://www.scopus.com/inward/record.uri?eid=2-s2.0-85170637602&doi=10.14569%2fIJACSA.2023.01408103&partnerID=40&md5=c4377d826c692e88078c8d76d5b9ec35	Department of Computer Engineering, Chiang Mai University, Chiang Mai, Thailand	Thida, M., Department of Computer Engineering, Chiang Mai University, Chiang Mai, Thailand	This paper presents a comprehensive analysis of labor market demands for Myanmar workers in Japan, and Thailand, focusing on opportunities for individuals without higher education degrees. Leveraging ChatGPT’s text classification and summarization capabilities, we extracted vital insights from extensive job advertisements and social media groups. The dataset comprises 152 job advertisements from …	ChatGPT; labour market analysis; online job adverts; skills demand; skills identification	Classification (of information); Commerce; Decision making; Text processing; ChatGPT; Labor market analyse; Labour market; Market analysis; Market demand; Myanmars; Online job advert; Skill demand; Skill identification; Thailand; Employment						The authors would like to thank the researchers and data analysts from Women in Tech (Myanmar) for collecting the job advertisements manually.																Sutirtha, S. R., Giorgia, D., Elizabeth, R., A growing crisis: Work, workers and wellbeing in myanmar? (2023) World Bank, Tech. Rep, , [1]; Nikoloski, Z., Smith-Govoni, R., (2023) Covid-19, coup d’etat and poverty, , [2] United Nations(UN), Tech. Rep; of Myanmar, G. N. L., (2022) Youths keen on going overseas for work, , [3] May; Smedt, J., Vrang, M., Papantoniou, A., (2015) Esco: Towards a seman…				Science and Information Organization
158	Thirunavukarasu A.J., Hassan R., Mahmood S., Sanghera R., Barzangi K., El Mukashfi M., Shah S.	57219669690;57243967600;58284312900;57923732000;57779567100;58284149400;58283347000;	Trialling a Large Language Model (ChatGPT) in General Practice with the Applied Knowledge Test: Observational Study Demonstrating Opportunities and Limitations in Primary Care	2023	JMIR Medical Education	9		e46599				44	10.2196/46599	https://www.scopus.com/inward/record.uri?eid=2-s2.0-85159891977&doi=10.2196%2f46599&partnerID=40&md5=c2772ec8042c4923172ffcd04001a2a3	University of Cambridge School of Clinical Medicine, Cambridge, United Kingdom; Attenborough Surgery, Bushey Medical Centre, Bushey, United Kingdom	Thirunavukarasu, A.J., University of Cambridge School of Clinical Medicine, Cambridge, United Kingdom; Hassan, R., University of Cambridge School of Clinical Medicine, Cambridge, United Kingdom; Mahmood, S., University of Cambridge School of Clinical Medicine, Cambridge, United Kingdom; Sanghera, R., University of Cambridge School of Clinical Medicine, Cambridge, United Kingdom; Barzangi, K., Uni…	Background: Large language models exhibiting human-level performance in specialized tasks are emerging; examples include Generative Pretrained Transformer 3.5, which underlies the processing of ChatGPT. Rigorous trials are required to understand the capabilities of emerging technology, so that innovation can be directed to benefit patients and practitioners. Objective: Here, we evaluated the stre…	AI; artificial intelligence; chatbot; ChatGPT; decision support techniques; deep learning; family medicine; general practice; large language model; natural language processing; primary care							AJT and SS extend their thanks to Dr Sandip Pramanik for his advice and tutelage.																Esteva, A, Robicquet, A, Ramsundar, B, Kuleshov, V, DePristo, M, Chou, K, A guide to deep learning in healthcare (2019) Nat Med, 25 (1), pp. 24-29. , Jan 7; [doi] [Medline: 30617335]; Brown, TB, Mann, B, Ryder, N, Subbiah, M, Kaplan, J, Dhariwal, P, Language models are few-shot learners (2020) 2020 Presented at: 34th Conference on Neural Information Processing Systems (NeurIPS 2020), , https://pa…	Thirunavukarasu, A.J.; University of Cambridge School of Clinical Medicine, Box 111 Cambridge Biomedical Campus, United Kingdom; email: ajt205@cantab.ac.uk			JMIR Publications Inc.
159	Tsai M.-L., Ong C.W., Chen C.-L.	57953443700;57203358105;7501958595;	Exploring the use of large language models (LLMs) in chemical engineering education: Building core course problem models with Chat-GPT	2023	Education for Chemical Engineers	44			71	95		18	10.1016/j.ece.2023.05.001	https://www.scopus.com/inward/record.uri?eid=2-s2.0-85160214425&doi=10.1016%2fj.ece.2023.05.001&partnerID=40&md5=23f184207eb4faab02d1ded948474c39	Department of Chemical Engineering, National Taiwan University, Taipei, Taiwan	Tsai, M.-L., Department of Chemical Engineering, National Taiwan University, Taipei, Taiwan; Ong, C.W., Department of Chemical Engineering, National Taiwan University, Taipei, Taiwan; Chen, C.-L., Department of Chemical Engineering, National Taiwan University, Taipei, Taiwan	This study highlights the potential benefits of integrating Large Language Models (LLMs) into chemical engineering education. In this study, Chat-GPT, a user-friendly LLM, is used as a problem-solving tool. Chemical engineering education has traditionally focused on fundamental knowledge in the classroom with limited opportunities for hands-on problem-solving. To address this issue, our study pro…	Chat-GPT; Engineering education; Industry 4.0 skill; Large language models (LLMs); Problem-solving; Programming in chemical engineering	Computational linguistics; Education computing; Efficiency; Engineering education; Industry 4.0; Chat-GPT; Chemical engineering education; Core course; Education buildings; Industry 4.0 skill; Language model; Large language model; Problem models; Problem-solving; Programming in chemical engineering; Students					National Science and Technology Council, NSTC; Ministry of Science and Technology, Taiwan, MOST: MOST 110-2221-E-002-022, MOST 111-2221-E-002-001	This research was funded by the National Science and Technology Council , Taiwan (previously Ministry of Science and Technology, Taiwan), grant numbers MOST 110-2221-E-002-022 and MOST 111-2221-E-002-001 .										Andor, D., He, L., Lee, K., Pitler, E., Giving BERT a calculator: finding operations and arguments with reading comprehension (2019) arXiv Prepr. arXiv, 1909; Arjmandi, M., Woo, M.W., Mankelow, C., Loho, T., Shahbaz, K., Auckaili, A., Thambyah, A., Embedding computer programming into a chemical engineering course: the impact on experiential learning (2023) Educ. Chem. Eng., 43, pp. 50-57; Baidoo-…	Chen, C.-L.; Department of Chemical Engineering, Taiwan; email: CCL@ntu.edu.tw			Elsevier B.V.					17497728				English	Educ. Chem. Eng.
160	Tsolaki M., Makri M., Tsatali M., Teichmann Β.	7004174854;57252638500;36633300500;57190231236;	European Projects for Patients with Dementia and Their Caregivers	2023	Advances in Experimental Medicine and Biology	1425			609	618			10.1007/978-3-031-31986-0_59	https://www.scopus.com/inward/record.uri?eid=2-s2.0-85168192011&doi=10.1007%2f978-3-031-31986-0_59&partnerID=40&md5=d8c14dbceccab14393357f277850cba9	Alzheimer Hellas, Thessaloniki, Greece; Laboratory of Neurodegenerative diseases, Center for Interdisciplinary Research and Innovation (CIRI-AUTh), Balkan Center, Aristotle University of Thessaloniki, Thessaloniki, Greece; Network Aging Research, Heidelberg University, Heidelberg, Germany	Tsolaki, M., Alzheimer Hellas, Thessaloniki, Greece, Laboratory of Neurodegenerative diseases, Center for Interdisciplinary Research and Innovation (CIRI-AUTh), Balkan Center, Aristotle University of Thessaloniki, Thessaloniki, Greece; Makri, M., Alzheimer Hellas, Thessaloniki, Greece, Laboratory of Neurodegenerative diseases, Center for Interdisciplinary Research and Innovation (CIRI-AUTh), Balk…	As we all know there is no treatment that can stop or delay the progression of dementia. The treatment we use is only symptomatic. EFNS (European Federation of Neurological Societies) recommendations for dementia prevention by Sorbi et al. (2012) concluded that there is no treatment, no lifestyle, which could have an effect on prevention or delay of onset of different forms of dementia until toda…	AD-gaming; AddNeuroMed; ASPAD; BRIDGE; De-Sign; Dementia right; DESCRIPA; E.L.So.M.C.I; European projects; Games4CoSkills; GECONEU; iCONNECT; ICTUS; INFOCARE; LLM; PIA; RADAR; RECAGE; S.IN.CA.L.A; Story2remember; VRADA	cholinergic receptor blocking agent; AddNeuroMed study; Alzheimer disease; Augmentation of the Support of Patients suffering from Alzheimer Disease and their caregivers study; caregiver; clinical practice; cognitive rehabilitation; De-Sign project; degenerative disease; dementia; Dementia Right study; DESCRIPA study; Development of Screening Guidelines and Clinical Criteria for Predementia Alzhei…					Horizon 2020 Framework Programme, H2020: 779237; European Commission, EC; Academy of Finland, AKA; European Social Fund, ESF; Ministry of Education, Lifelong Learning and Religious Affairs; Swedish Brain Power, SBP	As part of InnoMed, it was a precursor of the Innovative Medicines Initiative (IMI). AddNeuroMed was a cross-European study with participants from six countries (the United Kingdom, Italy, Finland, France, Greece, Poland) and funded by the European Union (EU) and members of the European Federation for Pharmaceutical Industries and Associations (EFPIA), and designed to find biomarkers, or tests, f…	It is materialized by the Special Account of the Research Committee at Aristotle University of Thessaloniki. The project is funded by the European Union (European Social Fund) and the Ministry of Education, Lifelong Learning and Religious Affairs in the context of the National Strategic Reference Framework (NSRF, 2007– 2013). The results of this program were: (1) many Internet-based exercises for…	The RECAGE project will tackle one of the most challenging problems arising during the clinical course of dementia: the so-called Behavioral and Psychological Symptoms of Dementia (BPSD). The current state-of-the-art treatment of these symptoms is still unsatisfactory and there are many unmet needs in this area. The major objective of the project will be to assess the effectiveness of an interven…														Scheltens, P, Alzheimer's disease (2016) Lancet, 388 (10043), pp. 505-517. , [PubMed: 26921134]; Jansen, WJ, Prevalence of cerebral amyloid pathology in persons without dementia: a metaanalysis (2015) JAMA, 313 (19), pp. 1924-1938. , [PubMed: 25988462]; Jack CR, Jr, NIA-AA research framework: toward a biological definition of Alzheimer's disease (2018) Alzheimers Dement, 14 (4), pp. 535-562. , [P…	Tsolaki, M.; Alzheimer HellasGreece			Springer
161	Ülkü A.	58922933600;	Artificial intelligence-based large language models and integrity of exams and assignments in higher education: the case of tourism courses [Inteligência artificial baseada em modelos de linguagem de grande escala e integridade de provas e trabalhos no ensino superior: o caso dos cursos de turismo]	2023	Tourism and Management Studies	19	4		21	34			10.18089/tms.2023.190402	https://www.scopus.com/inward/record.uri?eid=2-s2.0-85186876344&doi=10.18089%2ftms.2023.190402&partnerID=40&md5=8dcf00ea2dbb4ed79b74d94f470bd0dd	School of Tourism and Hotel Management, Harran University, Department of Tourism Guidance, Turkey	Ülkü, A., School of Tourism and Hotel Management, Harran University, Department of Tourism Guidance, Turkey	There is an increasing concern regarding the potential misuse of ChatGPT-4 in compromising the integrity of examinations and assignments. This study aims to examine the capabilities of ChatGPT-4 in critical thinking abilities, whether it poses a threat to examinations and assignments in higher education, and create a discussion agenda on this issue. ChatGPT-4 was asked to generate, answer, and cr…	Artificial Intelligence; ChatGPT; Exams; Integrity; Large Language Models (LLM); Tourism Education																	Ababneh, K. I., Ahmed, K., Dedousis, E., Predictors of cheating in online exams among business students during the Covid pandemic: Testing the theory of planned behavior (2022) The International Journal of Management Education, 20 (3), p. 100713. , https://doi.org/10.1016/j.ijme.2022.100713; Adzima, K., Examining online cheating in higher education using traditional classroom cheating as a guide …	Ülkü, A.; School of Tourism and Hotel Management, Turkey; email: abdullahulku@harran.edu.tr			University of Algarve					21828458				English	Tour. Manag. Stud
162	Uz C., Umay E.	57207102845;24069550800;	“Dr ChatGPT”: Is it a reliable and useful source for common rheumatic diseases?	2023	International Journal of Rheumatic Diseases	26	7		1343	1349		8	10.1111/1756-185X.14749	https://www.scopus.com/inward/record.uri?eid=2-s2.0-85159889928&doi=10.1111%2f1756-185X.14749&partnerID=40&md5=3c5fecb276a9043b1a466a688bd03513	Department of Physical Medicine and Rehabilitation, Etlik City Hospital, Ankara, Turkey	Uz, C., Department of Physical Medicine and Rehabilitation, Etlik City Hospital, Ankara, Turkey; Umay, E., Department of Physical Medicine and Rehabilitation, Etlik City Hospital, Ankara, Turkey	Aim: It is inevitable that artificial intelligence applications will be used as a source of information in the field of health in the near future. For this reason, we aimed to evaluate whether ChatGPT, a new Large Language Model, can be used to obtain information about common rheumatic diseases. Materials and methods: Common rheumatic diseases were identified using the American College of Rheumat…	artificial intelligence; chatbot; ChatGPT; large language model; rheumatic diseases	ankylosing spondylitis; Article; artificial intelligence; ChatGPT; Cronbach alpha coefficient; fibromyalgia; gout; human; interrater reliability; Likert scale; osteoarthritis; psoriatic arthritis; reliability; rheumatic disease; rheumatoid arthritis; search engine; systemic lupus erythematosus; ankylosing spondylitis; artificial intelligence; osteoarthritis; reproducibility; rheumatic disease; rh…																Mintz, Y., Brodie, R., Introduction to artificial intelligence in medicine (2019) Minim Invasive Ther Allied Technol, 28 (2), pp. 73-81; Palanica, A., Flaschner, P., Thommandram, A., Li, M., Fossat, Y., Physicians' perceptions of chatbots in health care: cross-sectional web-based survey (2019) J Med Internet Res, 21 (4); Jeddi, Z., Bohr, A., (2020) Artificial intelligence in healthcare, , Academi…	Uz, C.; Department of Physical Medicine and Rehabilitation, Turkey; email: cumauz12@gmail.com			John Wiley and Sons Inc					17561841			37218530	English	Int. J. Rheum. Dis.
163	Vandamme F., Kaczmarski P.	55767590300;55767831700;	CHATGPT: A TOOL TOWARDS AN EDUCATION REVOLUTION?	2023	Scientia Paedagogica Experimentalis	60	1		95	134		1	10.57028/S60-095-Z1035	https://www.scopus.com/inward/record.uri?eid=2-s2.0-85171139373&doi=10.57028%2fS60-095-Z1035&partnerID=40&md5=c7e91f84dee190049ed451b6f0ade98a	Babbage Institute of Technology (Bikit)), Belgium; BIKEMA, Leiekaai 25-F2, Gent, 9000, Belgium	Vandamme, F., Babbage Institute of Technology (Bikit)), Belgium; Kaczmarski, P., BIKEMA, Leiekaai 25-F2, Gent, 9000, Belgium	In this article we start with elaborating the educational and cultural setting of the use of computers in general and of the additional impact of the ChatGPT in these. Their impact is changing the assessment of education in general. It is crucial to be aware of the related challenges when looking and studying ChatGPT. With this in mind we describe a case study involving the use of ChatGPT in elea…	Accusation; AI; AI chatbot; AI ethics; AI misuse; argumentation; assessment; case study; ChatGPT; computer-based education; defense; dyssocial; dyssocial techniques; e-learning; education; explanation; generating fake news; gnost; hidden curriculum; higher education; justification; Large Language Models; lying; manipulation; OpenAI; personality; plagiarism; prediction; primary school education; s…																							ALSUBAIE, M. A., Hidden Curriculum as One of Current Issue of Curriculum" (PDF) (2015), https://doi.org/10.48550/arXiv.2207.14255, Journal of Education and Practice.<paraend>BAVARIAN, M. et al., 2022. “Efficient Training of Language Models to Fill in the Middle 28 Jul 2022; BENDER, E.M., On the Dangers of Stochastic Parrots: Can Language Models Be Too Big? (2021) Communications of the ACM, FAccT …				ICIWO vzw
164	Varkevisser R.D.M., Birnie E., Vollenbrock C.E., Mul D., Van Dijk P.R., Van Der Klauw M.M., Veeze H., Wolffenbuttel B.H.R., Aanstoot H.-J.	57204288110;6603630987;57192386905;6603062087;55544741600;57211721127;6701788406;57216593031;7003562117;	Cardiovascular risk management in people with type 1 diabetes: Performance using three guidelines	2022	BMJ Open Diabetes Research and Care	10	4	bmjdrc-2022-002765				6	10.1136/bmjdrc-2022-002765	https://www.scopus.com/inward/record.uri?eid=2-s2.0-85134783154&doi=10.1136%2fbmjdrc-2022-002765&partnerID=40&md5=d2b80be3e6438b647eb094e5e1e709fc	Department of Endocrinology, University Medical Center Groningen, Groningen, Netherlands; Diabeter, Center for Focussed Diabetes Care and Research, Rotterdam, Netherlands; Department of Genetics, University Medical Center Groningen, Groningen, Netherlands	Varkevisser, R.D.M., Department of Endocrinology, University Medical Center Groningen, Groningen, Netherlands; Birnie, E., Diabeter, Center for Focussed Diabetes Care and Research, Rotterdam, Netherlands, Department of Genetics, University Medical Center Groningen, Groningen, Netherlands; Vollenbrock, C.E., Department of Endocrinology, University Medical Center Groningen, Groningen, Netherlands; …	Introduction Cardiovascular disease (CVD) is the leading cause of mortality in individuals with type 1 diabetes mellitus (T1DM). Cardiovascular risk management is therefore essential in the management of individuals with T1DM. This study describes the performance of lipid and blood pressure management in individuals with T1DM using three guidelines. Research design and methods Individuals ≥18 yea…	diabetes complications; diabetes mellitus, type 1; guideline adherence	angiotensin receptor antagonist; anticoagulant agent; antihypertensive agent; antilipemic agent; antithrombocytic agent; beta adrenergic receptor blocking agent; creatinine; dihydropyridine; dipeptidyl carboxypeptidase inhibitor; diuretic agent; ezetimibe; hemoglobin A1c; high density lipoprotein cholesterol; hydroxymethylglutaryl coenzyme A reductase inhibitor; lipid; low density lipoprotein cho…		creatinine, 19230-81-0, 60-27-5; dihydropyridine, 27790-75-6; ezetimibe, 163222-33-1; hemoglobin A1c, 62572-11-6; lipid, 66455-18-3; Antihypertensive Agents; Cholesterol, LDL			Diabetes Fonds: 2015.16.1856	This study was supported by Dutch Diabetes Research Foundation grant no. 2015.16.1856, for which we are very grateful.																Nathan, D.M., Cleary, P.A., J-Yc, B., Intensive diabetes treatment and cardiovascular disease in patients with type 1 diabetes (2005) N Engl J Med, 353, pp. 2643-2653; Rawshani, A., Rawshani, A., Franzén, S., Mortality and cardiovascular disease in type 1 and type 2 diabetes (2017) N Engl J Med Overseas Ed, 376, pp. 1407-1418; Lind, M., Svensson, A.-M., Kosiborod, M., Glycemic control and excess …	Varkevisser, R.D.M.; Department of Endocrinology, Netherlands; email: r.d.m.varkevisser@umcg.nl			BMJ Publishing Group
165	Virvou M., Tsihrintzis G.A.	7003569675;7003361233;	Is ChatGPT Beneficial to Education? A Holistic Evaluation Framework Based on Intelligent Tutoring Systems	2023	14th International Conference on Information, Intelligence, Systems and Applications, IISA 2023								10.1109/IISA59645.2023.10345949	https://www.scopus.com/inward/record.uri?eid=2-s2.0-85182019187&doi=10.1109%2fIISA59645.2023.10345949&partnerID=40&md5=cadd7471a4188b4b35924184497087a5	University of Piraeus, Department of Informatics, Piraeus, Greece	Virvou, M., University of Piraeus, Department of Informatics, Piraeus, Greece; Tsihrintzis, G.A., University of Piraeus, Department of Informatics, Piraeus, Greece	The recent launch of ChatGPT by OpenAI has created a profound global impact, initiating deep questions among educators about how it might affect education, syllabi and teaching methods. Currently, the full scope of potential benefits and risks associated with ChatGPT in education remains unclear, given that its impact surpasses the level of preparation educators and institutions may have had for …	AI in Education; ChatGPT; e-learning; Educational Evaluation Frameworks; educational software; generative AI; Intelligent Tutoring Systems; large language models	Education computing; Intelligent vehicle highway systems; Knowledge based systems; Teaching; AI in education; ChatGPT; E - learning; Educational evaluation; Educational evaluation framework; Educational software; Evaluation framework; Generative AI; Intelligent tutoring; Intelligent tutoring system; Language model; Large language model; Tutoring system; Computer aided instruction					T2EDK-02654; European Regional Development Fund, ERDF; University of Piraeus Research Centre, UPRC	ACKNOWLEDGEMENTS This work has been partly supported by the University of Piraeus Research Center and co-financed by the European Regional Development Fund of the European Union and Greek national funds through the Operational Program Competitiveness, Entrepreneurship and Innovation, under thecall RESEARCH-CREATE-INNOVATE (project “KnowYourVisitor”, project code: T2EDK-02654).																(2021) ChatGPT: OpenAI's State-of-The-Art Chatbot, , OpenAI; Virvou, M., Alepis, E., Tsihrintzis, G.A., Jain, L.C., Machine learning paradigms-Advances in learning analytics (2020) Intelligent Systems Reference Library, 158. , Springer; Virvou, M., Brodsky, A., Bourbakis, N.G., Editorial (2018) Int. J. Artif. Intell. Tools, 27 (7), p. 18020031; Virvou, M., A new era towards more engaging and huma…				Institute of Electrical and Electronics Engineers Inc.	14th International Conference on Information, Intelligence, Systems and Applications, IISA 2023	10 July 2023 through 12 July 2023		195501
166	Voelker R.	26221960700;	The Promise and Pitfalls of AI in the Complex World of Diagnosis, Treatment, and Disease Management	2023	JAMA	330	15		1416	1419			10.1001/jama.2023.19180	https://www.scopus.com/inward/record.uri?eid=2-s2.0-85174751249&doi=10.1001%2fjama.2023.19180&partnerID=40&md5=23d53c1b5c5ea2b7e4efb48cb02b3ad4		Voelker, R.	[No abstract available]		hemoglobin A1c; abdominal radiography; American; artificial intelligence; blood sampling; California; cancer diagnosis; career mobility; ChatGPT; chronic disease; clinical medicine; clinical outcome; computer assisted tomography; computer model; computer simulation; diabetes mellitus; diagnostic procedure; doctor patient relationship; economic aspect; electric vehicle; family support; general pra…		hemoglobin A1c, 62572-11-6																		American Medical Association					987484		JAMAA	37755919	English	JAMA
167	Wang K.D., Burkholder E., Wieman C., Salehi S., Haber N.	57142927200;57195574952;7006833489;54795917900;56353182800;	Examining the potential and pitfalls of ChatGPT in science and engineering problem-solving	2023	Frontiers in Education	8		1330486					10.3389/feduc.2023.1330486	https://www.scopus.com/inward/record.uri?eid=2-s2.0-85183909215&doi=10.3389%2ffeduc.2023.1330486&partnerID=40&md5=46614a40804cf67086ad7e5061938edf	Graduate School of Education, Stanford University, StanfordCA, United States; Department of Physics, Auburn University, Auburn, AL, United States; Department of Physics, Stanford University, StanfordCA, United States	Wang, K.D., Graduate School of Education, Stanford University, StanfordCA, United States; Burkholder, E., Department of Physics, Auburn University, Auburn, AL, United States; Wieman, C., Graduate School of Education, Stanford University, StanfordCA, United States, Department of Physics, Stanford University, StanfordCA, United States; Salehi, S., Graduate School of Education, Stanford University, …	The study explores the capabilities of OpenAI's ChatGPT in solving different types of physics problems. ChatGPT (with GPT-4) was queried to solve a total of 40 problems from a college-level engineering physics course. These problems ranged from well-specified problems, where all data required for solving the problem was provided, to under-specified, real-world problems where not all necessary dat…	authentic problems; ChatGPT; generative AI models; GPT-4; physics education; problem-solving; STEM education						Stanford Institute for Human-Centered Artificial Intelligence, Stanford University, HAI	The author(s) declare financial support was received for the research, authorship, and/or publication of this article. This research was supported by the Stanford Accelerator for Learning and the Stanford Institute for Human-Centered AI.										Achiam, J., Adler, S., Agarwal, S., Ahmad, L., Akkaya, I., Aleman, F.L., GPT-4 technical report (2023) arXiv preprint; Bao, L., Koenig, K., Physics education research for 21st century learning (2019) Discip. Interdscip. Sci. Educ. Res, 1, pp. 1-12; Bransford, J., Sherwood, R., Vye, N., Rieser, J., Teaching thinking and problem solving: research foundations (1986) Am. Psychol, 41, p. 1078; Bubeck,…	Wang, K.D.; Graduate School of Education, Stanford, United States; email: kdwang@stanford.edu			Frontiers Media SA					2504284X				English	Front. Educ.
168	Wang R.E., Wirawarn P., Goodman N., Demszky D.	57310835000;58476808800;12767629400;57210871455;	SIGHT: A Large Annotated Dataset on Student Insights Gathered from Higher Education Transcripts	2023	Proceedings of the Annual Meeting of the Association for Computational Linguistics				315	351				https://www.scopus.com/inward/record.uri?eid=2-s2.0-85174531400&partnerID=40&md5=d2f980930af2fe78838aabf013f13105	Stanford University, United States	Wang, R.E., Stanford University, United States; Wirawarn, P., Stanford University, United States; Goodman, N., Stanford University, United States; Demszky, D., Stanford University, United States	Lectures are a learning experience for both students and teachers. Students learn from teachers about the subject material, while teachers learn from students about how to refine their instruction. However, online student feedback is unstructured and abundant, making it challenging for teachers to learn and improve. We take a step towards tackling this challenge. First, we contribute a dataset fo…		Computational linguistics; Education computing; Large dataset; Annotated datasets; High educations; Human annotations; Human modelling; Interrater reliability; Learn+; Learning experiences; Qualitative analysis; Student feedback; Teachers'; Students					National Science Foundation, NSF	REW is supported by the National Science Foundation Graduate Research Fellowship. We thank Professor Shannon Seidel for feedback during the initial stages of the project. We thank Yunsung Kim, Allen Nie, Haley Lepp, and Gabriel Poesia for their feedback on the manuscript. We also thank Betsy Rajala, Quinn Waeiss and Professor Michael Bernstein from the Ethics and Society Review Board for guidance…																Nasser-Abu Alhija, Fadia, Fresko, Barbara, Student evaluation of instruction: what can be learned from students’ written comments? (2009) Studies in Educational evaluation, 35 (1), pp. 37-44; Asselin, Marlene, Dobson, Teresa, Meyers, Eric M, Teixiera, Cristina, Ham, Linda, Learning from youtube: an analysis of information literacy in user discourse (2011) Proceedings of the 2011 iConference, pp. …		Kochmar E.Burstein J.Horbach A.Horbach A.Horbach A.Laarmann-Quante R.Madnani N.Tack A.Yaneva V.Yuan Z.Zesch T.Zesch T.	Cambridge University Press and Assessment;CATALPA;Duolingo;Educational Testing Service;et al.;Grammarly	Association for Computational Linguistics (ACL)	18th Workshop on Innovative Use of NLP for Building Educational Applications, BEA 2023	13 July 2023		193152
169	Watermeyer R., Phipps L., Lanclos D., Knight C.	36440857400;8379226800;36863839300;57203093658;	Generative AI and the Automating of Academia	2023	Postdigital Science and Education							6	10.1007/s42438-023-00440-6	https://www.scopus.com/inward/record.uri?eid=2-s2.0-85175797450&doi=10.1007%2fs42438-023-00440-6&partnerID=40&md5=89551ebb3288297b712567b2d20f08a1	Centre for Higher Education Transformations, School of Education, University of Bristol, Bristol, United Kingdom; JISC and Keele Institute for Innovation and Teaching Excellence, Keele University, Keele, United Kingdom; Munster Technological University, Cork, Ireland; School of Education, University of Bristol, Bristol, United Kingdom	Watermeyer, R., Centre for Higher Education Transformations, School of Education, University of Bristol, Bristol, United Kingdom; Phipps, L., JISC and Keele Institute for Innovation and Teaching Excellence, Keele University, Keele, United Kingdom; Lanclos, D., Munster Technological University, Cork, Ireland; Knight, C., School of Education, University of Bristol, Bristol, United Kingdom	The neoliberal transformation of higher education in the UK and an intertwined focus on the productive efficiency and prestige value of universities has led to an epidemic of overwork and precarity among academics. Many are found to be struggling with lofty performance expectations and an insistence that all dimensions of their work consistently achieve positional gains despite ferocious competit…	Academia; GAI; Generative artificial intelligence; Postdigital; Scholarly craftsmanship; Slow scholarship; Work intensification																							Alvesson, M., (2013) The triumph of emptiness: Consumption, higher education and work organization., , https://doi.org/10.1093/oso/9780199660940.001.0001, Oxford, Oxford University Press; Arday, J., Jones, C., Same storm, different boats: the impact of COVID-19 on Black students and academic staff in UK and US higher education (2022) Higher Education; Bender, E.M., Gebru, T., McMillan-Major, A., …	Watermeyer, R.; Centre for Higher Education Transformations, United Kingdom; email: Richard.watermeyer@bristol.ac.uk			Springer International Publishing
170	Whitfield S., Hofmann M.A.	57210415729;36482822200;	Elicit: AI literature review research assistant	2023	Public Services Quarterly	19	3		201	207		1	10.1080/15228959.2023.2224125	https://www.scopus.com/inward/record.uri?eid=2-s2.0-85171659172&doi=10.1080%2f15228959.2023.2224125&partnerID=40&md5=3d7af440639d05ea8ce7633862eb200b	University Libraries at Rider University, Lawrenceville, NJ, United States	Whitfield, S., University Libraries at Rider University, Lawrenceville, NJ, United States; Hofmann, M.A., University Libraries at Rider University, Lawrenceville, NJ, United States	Can Artificial Intelligence (AI) be used for good in the academic and creative worlds? This is a question that is being asked by educators who are concerned about student learning and academic integrity AI use in higher education. Numerous articles decry the potential of college students using AI to cheat on exam questions, discussion board posts, and research papers. Yet, through the use of lang…	Artificial intelligence; literature review; search engine																							(2023), https://www.semanticscholar.org/faq, Semantic Scholar FAQ. Retrieved May 5, 2023, from; Formica, A., Taglino, F., An enriched information-theoretic definition of semantic similarity in a taxonomy (2021) IEEE Access, 9, pp. 100583-100593; (2022), https://ought.org/updates/2022-04-08-elicit-plan, Ought: The plan for elicit. Retrieved April 7, 2023, from; (2023), https://elicit.org/faq, Elic…	Whitfield, S.; University Libraries at Rider University, 2083 Lawrenceville Road, United States; email: swhitfield@rider.edu			Routledge
171	Willey L., White B.J., Deale C.S.	36057766500;55417495300;16240762200;	Teaching AI in the college course: introducing the AI prompt development life cycle (PDLC)	2023	Issues in Information Systems	24	2		123	138		1	10.48009/2_iis_2023_111	https://www.scopus.com/inward/record.uri?eid=2-s2.0-85174247261&doi=10.48009%2f2_iis_2023_111&partnerID=40&md5=bf90b1f416de9274e54eeea7de42393a	Western Carolina University, United States; East Carolina University, United States	Willey, L., Western Carolina University, United States; White, B.J., Western Carolina University, United States; Deale, C.S., East Carolina University, United States	This paper discusses how the public emergence of generative AI is compelling those in academia to rethink teaching and learning and to consider the impact AI has on higher education. The decision as to when to use generative AI in a college course, and when not to, is now a significant component in the development of student assessment and activities. Obviously, there are academic activities that…	ChatGPT; generative AI; large language model; LLM; PDLC; prompt development life cycle; prompt engineering																							(2020) AACSB Business Accreditation Standards, , https://www.aacsb.edu/educators/accreditation/businessaccreditation/aacsb-business-accreditation-standards; Branch, R. M., (2009) Instructional design: The ADDIE approach, 722. , New York: Springer; Burke, B., Chandrasekaran, A., Sicular, S., (2022) Innovation insight for generative AI, , https://www.gartner.com/document/4022272?ref=solrAll&refval=…				International Association for Computer Information Systems
172	Williams D.O., Fadda E.	58288196300;10042754800;	Can ChatGPT pass Glycobiology?	2023	Glycobiology	33	8		606	614			10.1093/glycob/cwad064	https://www.scopus.com/inward/record.uri?eid=2-s2.0-85173580426&doi=10.1093%2fglycob%2fcwad064&partnerID=40&md5=176a97746d46c30d3529ba866bc19a35	Department of Chemistry, Maynooth University, co. Kildare, Maynooth, Ireland; Hamilton Institute, Maynooth University, co. Kildare, Maynooth, Ireland	Williams, D.O., Department of Chemistry, Maynooth University, co. Kildare, Maynooth, Ireland; Fadda, E., Department of Chemistry, Maynooth University, co. Kildare, Maynooth, Ireland, Hamilton Institute, Maynooth University, co. Kildare, Maynooth, Ireland	The release of text-generating applications based on interactive Large Language Models (LLMs) in late 2022 triggered an unprecedented and ever-growing interest worldwide. The almost instantaneous success of LLMs stimulated lively discussions in public media and in academic fora alike not only on the value and potentials of such tools in all areas of knowledge and information acquisition and distr…	AI; ChatGPT; Glycobiology; higher education; LLM	Article; carbohydrate analysis; ChatGPT; clinical evaluation; glycobiology; human; language model; medical documentation; medical information; multiple choice test; nonhuman; questionnaire; scientific literature; task performance; writing; glycomics; Glycomics; Humans						DOW is a final year BSc Double Honors student in Chemistry and in Mathematics and Statistics at Maynooth University. The work presented in this manuscript is part of DOW’s final year project in Chemistry. EF is an associate professor in the Department of Chemistry, affiliated to the Hamilton Institute at Maynooth University and project supervisor. EF designed the project. DOW ran all the tests on…										Bommasani, R, Hudson, DA, Adeli, E, Altman, R, Arora, S, von Arx, S, Bernstein, MS, Brunskill, E, (2021) On the opportunities and risks of foundation models, , arXiv [csLG]; Casalino, L, Gaieb, Z, Goldsmith, JA, Hjorth, CK, Dommer, AC, Harbison, AM, Fogarty, CA, McLellan, JS, Beyond shielding: the roles of glycans in the SARS-CoV-2 spike protein (2020) ACS Cent Sci, 6 (10), pp. 1722-1734; Chomsky…	Fadda, E.; Department of Chemistry, Ireland; email: elisa.fadda@mu.ie			Oxford University Press					9596658		GLYCE	37531256	English	Glycobiology
173	Xie X., Ding S.	58921228300;54881100500;	Opportunities, Challenges, Strategies, and Reforms for ChatGPT in Higher Education	2023	Proceedings - 2023 International Conference on Educational Knowledge and Informatization, EKI 2023				14	18			10.1109/EKI61071.2023.00010	https://www.scopus.com/inward/record.uri?eid=2-s2.0-85186755850&doi=10.1109%2fEKI61071.2023.00010&partnerID=40&md5=fcb4a0d1ad77ce8d806b6cdc36c4f9d0	Wuhan University of Science and Technology, Journal Editorial Department of Wuhan University of Science and Technology, Wuhan, China; Wuhan University of Science and Technology, College of Computer Science and Technology, Wuhan, China	Xie, X., Wuhan University of Science and Technology, Journal Editorial Department of Wuhan University of Science and Technology, Wuhan, China; Ding, S., Wuhan University of Science and Technology, College of Computer Science and Technology, Wuhan, China	ChatGPT is a powerful large language model developed by OpenAI. It has a profound impact on higher education fields. This technology offers exciting opportunities for students and educators, including personalized feedback, increased accessibility, interactive conversations, lecture preparation, performance evaluation, and new ways to teach complex concepts. At the same time, ChatGPT poses differ…	ChatGPT; Higher Education; Large Language Model	Computational linguistics; Education computing; ChatGPT; Education field; High educations; Higher education system; Human like; Language model; Large language model; Online exams; Performances evaluation; Personalized feedback; Students																Thorp, H.H., ChatGPT is fun, but not an author (2023) Science, 379 (6630), p. 313; Taecharungroj, V., What can ChatGPT do? ' Analyzing early reactions to the innovative AI Chatbot on Twitter (2023) Big Data and Cognitive Computing, 7 (35), p. 35; Biswas, S.S., Role of ChatGPT in public health (2023) Annals of Biomedical Engineering, 51, pp. 868-869; Van Dis, E.A.M., Bollen, J., Zuidema, W., Van R…	Ding, S.; Wuhan University of Science and Technology, China; email: 361782849@qq.com			Institute of Electrical and Electronics Engineers Inc.	2023 International Conference on Educational Knowledge and Informatization, EKI 2023	22 September 2023 through 24 September 2023		197355		9798350331264			English	Proc. - Int. Conf. Educ. Knowl. Informatiz., EKI
174	Yaroshenko T.O., Iaroshenko O.I.	56462729200;58823375900;	Artificial Intelligence (AI) for Research Lifecycle: Challenges and Opportunities	2023	University Library at a New Stage of Social Communications Development. Conference Proceedings	2023	8		194	201			10.15802/unilib/2023_294639	https://www.scopus.com/inward/record.uri?eid=2-s2.0-85182783744&doi=10.15802%2funilib%2f2023_294639&partnerID=40&md5=a263f311ebb3e4a34a18681eee732fdf	National University of Kyiv Mohyla Academy, Kyiv, Ukraine	Yaroshenko, T.O., National University of Kyiv Mohyla Academy, Kyiv, Ukraine; Iaroshenko, O.I., National University of Kyiv Mohyla Academy, Kyiv, Ukraine	Objective. This article aims to review the progress of AI technologies concerning their potential impact on academia, research processes, scientific communication, and libraries. Methods. AI tools for research lifecycle and their potential impact on academia and libraries were identified from various sources, mostly from the most influential recent scientific publications. Results. AI has become …	AI; artificial intelligence; ChatGPT; Llama-2; LLM; research lifecycle; scholarly publishing; scientific communication; аcademic libraries																							Alto, V., (2023) Modern generative AI with ChatGPT and OpenAI models: leverage the capabilities of OpenAI's LLM for productivity and innovation with GPT3, , https://www.oreilly.com/library/view/-/9781805123330/, Birmingham, UK: Packt Publishing. Retrieved October 12, 2023 from (in English); Currie, G., Academic integrity and artificial intelligence: is ChatGPT hype, hero or heresy? (2023) Seminar…				Dnipro National University of Railway Transport named after Academician V. Lazaryan	Conference on Library and knowledge management in times of crisis, 2023	5 October 2023 through 6 October 2023		306699
[truncated: 3 more rows]
[truncated: 59 more columns]

## Sheet: WOSInitial
Number	Publication Type	Authors	Book Authors	Book Editors	Book Group Authors	Author Full Names	Book Author Full Names	Group Authors	Article Title	Source Title	Book Series Title	Book Series Subtitle	Language	Document Type	Conference Title	Conference Date	Conference Location	Conference Sponsor	Conference Host	Author Keywords	Keywords Plus	Abstract	Addresses	Affiliations	Reprint Addresses	Email Addresses	Researcher Ids	ORCIDs	Funding Orgs	Funding Name Preferred	Funding Text	Cited References	Cited Reference Count	Times Cited, WoS Core	Times Cited, All Databases	180 Day Usage Count	Since 2013 Usage Count	Publisher	Publisher City	Publisher Address	ISSN	eISSN	ISBN	Journal Abbreviation	Journal ISO Abbreviation	Publication Date	Publication Year	Volume	Issue
[truncated: 631 more rows]
[truncated: 23 more columns]

## Sheet: ScopusF1
Number	Authors	Author(s) ID	Title	Year	Source title	Volume	Issue	Art. No.	Page start	Page end	Page count	Cited by	DOI	Link	Affiliations	Authors with affiliations	Abstract	Author Keywords	Index Keywords	Molecular Sequence Numbers	Chemicals/CAS	Tradenames	Manufacturers	Funding Details	Funding Text 1	Funding Text 2	Funding Text 3	Funding Text 4	Funding Text 5	Funding Text 6	Funding Text 7	Funding Text 8	Funding Text 9	Funding Text 10	References	Correspondence Address	Editors	Sponsors	Publisher	Conference name	Conference date	Conference location	Conference code	ISSN	ISBN	CODEN	PubMed ID	Language of Original Document	Abbreviated Source Title
[truncated: 177 more rows]
[truncated: 50 more columns]

[truncated: 10 more sheets: WOSF1, ScopusF2, WOSF2, DBS&WOS, F3, F4, F5, ELEGIBILITY, ELEGIBILITY FINAL, DATABASEFINAL]
